# Supplementary material
Source: publisher figshare collection journal article supplement (https://acs.figshare.com/ndownloader/files/4274304)
Supplement: Supplementary file 1 [file 4274304]

data_1a
 
_audit_creation_method            SHELXL-97
_chemical_name_systematic
;
 ?
;
_chemical_name_common             ?
_chemical_melting_point           ?
_chemical_formula_moiety          'C86 H61 Cr Mn3 N2 O14 P4 S2'
_chemical_formula_sum             'C86 H61 Cr Mn3 N2 O14 P4 S2'
_chemical_formula_weight          1751.19
 
loop_
 _atom_type_symbol
 _atom_type_description
 _atom_type_scat_dispersion_real
 _atom_type_scat_dispersion_imag
 _atom_type_scat_source
 'C'  'C'   0.0033   0.0016
 'International Tables Vol C Tables 4.2.6.8 and 6.1.1.4'
 'H'  'H'   0.0000   0.0000
 'International Tables Vol C Tables 4.2.6.8 and 6.1.1.4'
 'N'  'N'   0.0061   0.0033
 'International Tables Vol C Tables 4.2.6.8 and 6.1.1.4'
 'O'  'O'   0.0106   0.0060
 'International Tables Vol C Tables 4.2.6.8 and 6.1.1.4'
 'P'  'P'   0.1023   0.0942
 'International Tables Vol C Tables 4.2.6.8 and 6.1.1.4'
 'S'  'S'   0.1246   0.1234
 'International Tables Vol C Tables 4.2.6.8 and 6.1.1.4'
 'Cr'  'Cr'   0.3209   0.6236
 'International Tables Vol C Tables 4.2.6.8 and 6.1.1.4'
 'Mn'  'Mn'   0.3368   0.7283
 'International Tables Vol C Tables 4.2.6.8 and 6.1.1.4'
 
_symmetry_cell_setting            triclinic
_symmetry_space_group_name_H-M    'P -1'
 
loop_
 _symmetry_equiv_pos_as_xyz
 'x, y, z'
 '-x, -y, -z'
 
_cell_length_a                    13.6111(6)
_cell_length_b                    14.6217(7)
_cell_length_c                    21.6738(10)
_cell_angle_alpha                 88.358(2)
_cell_angle_beta                  87.626(2)
_cell_angle_gamma                 82.321(2)
_cell_volume                      4269.9(3)
_cell_formula_units_Z             2
_cell_measurement_temperature     298(2)
_cell_measurement_reflns_used     0
_cell_measurement_theta_min       0
_cell_measurement_theta_max       0
 
_exptl_crystal_description        prism
_exptl_crystal_colour             red
_exptl_crystal_size_max           0.38
_exptl_crystal_size_mid           0.34
_exptl_crystal_size_min           0.08
_exptl_crystal_density_meas       ?
_exptl_crystal_density_diffrn     1.362
_exptl_crystal_density_method     'not measured'
_exptl_crystal_F_000              1788
_exptl_absorpt_coefficient_mu     0.743
_exptl_absorpt_correction_type    multi-scan
_exptl_absorpt_correction_T_min   0.7655
_exptl_absorpt_correction_T_max   0.9429
_exptl_absorpt_process_details    ?
 
_exptl_special_details
;
 ?
;
 
_diffrn_ambient_temperature       298(2)
_diffrn_radiation_wavelength      0.71073
_diffrn_radiation_type            MoK\a
_diffrn_radiation_source          'fine-focus sealed tube'
_diffrn_radiation_monochromator   graphite
_diffrn_measurement_device_type   ?
_diffrn_measurement_method        ?
_diffrn_detector_area_resol_mean  ?
_diffrn_standards_number          ?
_diffrn_standards_interval_count  ?
_diffrn_standards_interval_time   ?
_diffrn_standards_decay_%         ?
_diffrn_reflns_number             27755
_diffrn_reflns_av_R_equivalents   0.0464
_diffrn_reflns_av_sigmaI/netI     0.0970
_diffrn_reflns_limit_h_min        -14
_diffrn_reflns_limit_h_max        16
_diffrn_reflns_limit_k_min        -17
_diffrn_reflns_limit_k_max        15
_diffrn_reflns_limit_l_min        -23
_diffrn_reflns_limit_l_max        25
_diffrn_reflns_theta_min          1.92
_diffrn_reflns_theta_max          24.98
_reflns_number_total              14861
_reflns_number_gt                 7898
_reflns_threshold_expression      >2sigma(I)
 
_computing_data_collection        ?
_computing_cell_refinement        ?
_computing_data_reduction         ?
_computing_structure_solution     'SHELXS-86 (Sheldrick, 1986)'
_computing_structure_refinement   'SHELXL-97 (Sheldrick, 1997)'
_computing_molecular_graphics     'Ortep-3 for Windows (Farrugia, 1997)'
_computing_publication_material   'WinGX publication routines (Farrugia, 1999)'
 
_refine_special_details
;
 Refinement of F^2^ against ALL reflections.  The weighted R-factor wR and
 goodness of fit S are based on F^2^, conventional R-factors R are based
 on F, with F set to zero for negative F^2^. The threshold expression of
 F^2^ > 2sigma(F^2^) is used only for calculating R-factors(gt) etc. and is
 not relevant to the choice of reflections for refinement.  R-factors based
 on F^2^ are statistically about twice as large as those based on F, and R-
 factors based on ALL data will be even larger.
;
 
_refine_ls_structure_factor_coef  Fsqd
_refine_ls_matrix_type            full
_refine_ls_weighting_scheme       calc
_refine_ls_weighting_details
 'calc w=1/[\s^2^(Fo^2^)+(0.0920P)^2^+0.0000P] where P=(Fo^2^+2Fc^2^)/3'
_atom_sites_solution_primary      direct
_atom_sites_solution_secondary    difmap
_atom_sites_solution_hydrogens    geom
_refine_ls_hydrogen_treatment     fixed
_refine_ls_extinction_method      none
_refine_ls_extinction_coef        ?
_refine_ls_number_reflns          14861
_refine_ls_number_parameters      1003
_refine_ls_number_restraints      0
_refine_ls_R_factor_all           0.1334
_refine_ls_R_factor_gt            0.0571
_refine_ls_wR_factor_ref          0.1843
_refine_ls_wR_factor_gt           0.1329
_refine_ls_goodness_of_fit_ref    0.972
_refine_ls_restrained_S_all       0.972
_refine_ls_shift/su_max           0.000
_refine_ls_shift/su_mean          0.000
 
loop_
 _atom_site_label
 _atom_site_type_symbol
 _atom_site_fract_x
 _atom_site_fract_y
 _atom_site_fract_z
 _atom_site_U_iso_or_equiv
 _atom_site_adp_type
 _atom_site_occupancy
 _atom_site_symmetry_multiplicity
 _atom_site_calc_flag
 _atom_site_refinement_flags
 _atom_site_disorder_assembly
 _atom_site_disorder_group
C1 C 0.3259(5) 0.9067(5) 0.1708(3) 0.077(2) Uani 1 1 d . . .
C2 C 0.3899(6) 0.9854(5) 0.2700(5) 0.1009(19) Uani 1 1 d . . .
C3 C 0.3868(6) 1.0681(5) 0.1590(4) 0.1009(19) Uani 1 1 d . . .
C4 C 0.5619(6) 1.0036(5) 0.2105(4) 0.086(2) Uani 1 1 d . . .
C5 C 0.4984(5) 0.9254(4) 0.1095(4) 0.076(2) Uani 1 1 d . . .
C6 C 0.7422(6) 0.7815(6) 0.2723(4) 0.095(2) Uani 1 1 d . . .
C7 C 0.7087(4) 0.8088(4) 0.1568(4) 0.073(2) Uani 1 1 d . . .
C8 C 0.7724(4) 0.6434(4) 0.1975(3) 0.0562(15) Uani 1 1 d . . .
C9 C 0.4587(4) 0.7052(4) 0.1232(3) 0.0532(15) Uani 1 1 d . . .
C10 C 0.5393(4) 0.5479(4) 0.1708(2) 0.0538(15) Uani 1 1 d . . .
C11 C 0.3834(5) 0.6325(4) 0.2195(3) 0.0579(15) Uani 1 1 d . . .
C12 C 0.4119(5) 0.6319(5) 0.3603(3) 0.0655(17) Uani 1 1 d . . .
C13 C 0.3260(5) 0.7807(4) 0.3089(3) 0.0652(17) Uani 1 1 d . . .
C14 C 0.4788(5) 0.7840(5) 0.3753(4) 0.083(2) Uani 1 1 d . . .
C15 C 0.3142(4) 0.3163(4) 0.3526(3) 0.0551(15) Uani 1 1 d . . .
C16 C 0.3636(5) 0.2282(5) 0.3537(3) 0.086(2) Uani 1 1 d . . .
H16 H 0.3347 0.1813 0.3743 0.103 Uiso 1 1 calc R . .
C17 C 0.4561(6) 0.2083(6) 0.3246(5) 0.119(3) Uani 1 1 d . . .
H17 H 0.4895 0.1485 0.3263 0.143 Uiso 1 1 calc R . .
C18 C 0.4984(6) 0.2765(7) 0.2932(4) 0.115(3) Uani 1 1 d . . .
H18 H 0.5599 0.2629 0.2728 0.139 Uiso 1 1 calc R . .
C19 C 0.4506(6) 0.3639(7) 0.2919(4) 0.108(3) Uani 1 1 d . . .
H19 H 0.4801 0.4103 0.2711 0.130 Uiso 1 1 calc R . .
C20 C 0.3585(5) 0.3851(5) 0.3211(3) 0.079(2) Uani 1 1 d . . .
H20 H 0.3262 0.4453 0.3196 0.095 Uiso 1 1 calc R . .
C21 C 0.1250(4) 0.4369(4) 0.3525(2) 0.0472(13) Uani 1 1 d . . .
C22 C 0.0490(4) 0.4209(4) 0.3143(2) 0.0565(15) Uani 1 1 d . . .
H22 H 0.0346 0.3612 0.3092 0.068 Uiso 1 1 calc R . .
C23 C -0.0046(5) 0.4947(5) 0.2842(3) 0.0705(18) Uani 1 1 d . . .
H23 H -0.0556 0.4848 0.2590 0.085 Uiso 1 1 calc R . .
C24 C 0.0172(5) 0.5826(5) 0.2913(3) 0.076(2) Uani 1 1 d . . .
H24 H -0.0188 0.6320 0.2708 0.091 Uiso 1 1 calc R . .
C25 C 0.0923(6) 0.5977(5) 0.3288(3) 0.085(2) Uani 1 1 d . . .
H25 H 0.1072 0.6575 0.3327 0.101 Uiso 1 1 calc R . .
C26 C 0.1457(5) 0.5262(4) 0.3606(3) 0.0631(17) Uani 1 1 d . . .
H26 H 0.1948 0.5374 0.3869 0.076 Uiso 1 1 calc R . .
C27 C 0.2110(4) 0.3764(4) 0.4677(2) 0.0530(14) Uani 1 1 d . . .
C28 C 0.3024(5) 0.3688(5) 0.4920(3) 0.090(2) Uani 1 1 d . . .
H28 H 0.3590 0.3482 0.4681 0.108 Uiso 1 1 calc R . .
C29 C 0.3096(7) 0.3924(7) 0.5533(4) 0.123(3) Uani 1 1 d . . .
H29 H 0.3714 0.3877 0.5709 0.148 Uiso 1 1 calc R . .
C30 C 0.2253(7) 0.4225(5) 0.5877(3) 0.100(3) Uani 1 1 d . . .
H30 H 0.2305 0.4369 0.6288 0.120 Uiso 1 1 calc R . .
C31 C 0.1345(6) 0.4318(5) 0.5630(3) 0.087(2) Uani 1 1 d . . .
H31 H 0.0779 0.4539 0.5864 0.104 Uiso 1 1 calc R . .
C32 C 0.1283(5) 0.4079(4) 0.5030(3) 0.0643(17) Uani 1 1 d . . .
H32 H 0.0664 0.4130 0.4857 0.077 Uiso 1 1 calc R . .
C33 C 0.0571(4) 0.0977(3) 0.3679(3) 0.0543(15) Uani 1 1 d . . .
C34 C 0.1098(5) 0.0839(4) 0.3121(3) 0.0654(17) Uani 1 1 d . . .
H34 H 0.1635 0.1158 0.3029 0.079 Uiso 1 1 calc R . .
C35 C 0.0834(7) 0.0232(5) 0.2698(3) 0.087(2) Uani 1 1 d . . .
H35 H 0.1199 0.0138 0.2327 0.104 Uiso 1 1 calc R . .
C36 C 0.0048(8) -0.0223(5) 0.2823(4) 0.099(3) Uani 1 1 d . . .
H36 H -0.0122 -0.0634 0.2539 0.119 Uiso 1 1 calc R . .
C37 C -0.0486(7) -0.0089(5) 0.3350(4) 0.098(3) Uani 1 1 d . . .
H37 H -0.1033 -0.0402 0.3424 0.118 Uiso 1 1 calc R . .
C38 C -0.0245(5) 0.0508(4) 0.3788(3) 0.0684(18) Uani 1 1 d . . .
H38 H -0.0627 0.0594 0.4153 0.082 Uiso 1 1 calc R . .
C39 C -0.0105(4) 0.2120(4) 0.4725(3) 0.0562(15) Uani 1 1 d . . .
C40 C -0.0748(5) 0.2893(4) 0.4545(3) 0.0662(17) Uani 1 1 d . . .
H40 H -0.0600 0.3222 0.4187 0.079 Uiso 1 1 calc R . .
C41 C -0.1605(5) 0.3179(5) 0.4893(4) 0.083(2) Uani 1 1 d . . .
H41 H -0.2040 0.3690 0.4769 0.100 Uiso 1 1 calc R . .
C42 C -0.1802(6) 0.2685(6) 0.5434(4) 0.094(2) Uani 1 1 d . . .
H42 H -0.2375 0.2864 0.5673 0.113 Uiso 1 1 calc R . .
C43 C -0.1162(6) 0.1945(5) 0.5614(4) 0.104(3) Uani 1 1 d . . .
H43 H -0.1296 0.1628 0.5979 0.125 Uiso 1 1 calc R . .
C44 C -0.0319(5) 0.1657(4) 0.5265(3) 0.081(2) Uani 1 1 d . . .
H44 H 0.0110 0.1145 0.5394 0.097 Uiso 1 1 calc R . .
C45 C 0.1848(4) 0.1061(4) 0.4713(3) 0.0566(15) Uani 1 1 d . . .
C46 C 0.2135(6) 0.1433(5) 0.5236(3) 0.085(2) Uani 1 1 d . . .
H46 H 0.1838 0.2014 0.5357 0.102 Uiso 1 1 calc R . .
C47 C 0.2867(7) 0.0950(7) 0.5589(4) 0.116(3) Uani 1 1 d . . .
H47 H 0.3046 0.1192 0.5954 0.140 Uiso 1 1 calc R . .
C48 C 0.3315(7) 0.0127(8) 0.5397(5) 0.136(4) Uani 1 1 d . . .
H48 H 0.3825 -0.0186 0.5624 0.163 Uiso 1 1 calc R . .
C49 C 0.3045(7) -0.0255(7) 0.4886(5) 0.142(4) Uani 1 1 d . . .
H49 H 0.3364 -0.0828 0.4765 0.170 Uiso 1 1 calc R . .
C50 C 0.2282(5) 0.0211(5) 0.4533(3) 0.092(2) Uani 1 1 d . . .
H50 H 0.2078 -0.0056 0.4183 0.111 Uiso 1 1 calc R . .
C51 C 0.7474(4) 0.4551(3) 0.0130(2) 0.0423(12) Uani 1 1 d . . .
C52 C 0.7786(5) 0.5324(4) 0.0351(3) 0.0659(17) Uani 1 1 d . . .
H52 H 0.8350 0.5263 0.0585 0.079 Uiso 1 1 calc R . .
C53 C 0.7290(6) 0.6186(4) 0.0239(3) 0.085(2) Uani 1 1 d . . .
H53 H 0.7518 0.6705 0.0390 0.102 Uiso 1 1 calc R . .
C54 C 0.6460(5) 0.6275(4) -0.0096(3) 0.079(2) Uani 1 1 d . . .
H54 H 0.6118 0.6859 -0.0170 0.095 Uiso 1 1 calc R . .
C55 C 0.6118(5) 0.5523(5) -0.0325(3) 0.0743(19) Uani 1 1 d . . .
H55 H 0.5553 0.5592 -0.0558 0.089 Uiso 1 1 calc R . .
C56 C 0.6624(4) 0.4658(4) -0.0206(3) 0.0606(16) Uani 1 1 d . . .
H56 H 0.6389 0.4140 -0.0353 0.073 Uiso 1 1 calc R . .
C57 C 0.7301(4) 0.2623(3) 0.0391(2) 0.0426(12) Uani 1 1 d . . .
C58 C 0.6504(5) 0.2855(4) 0.0802(3) 0.0634(16) Uani 1 1 d . . .
H58 H 0.6415 0.3428 0.0987 0.076 Uiso 1 1 calc R . .
C59 C 0.5846(5) 0.2236(5) 0.0936(3) 0.083(2) Uani 1 1 d . . .
H59 H 0.5306 0.2394 0.1207 0.099 Uiso 1 1 calc R . .
C60 C 0.5982(6) 0.1383(5) 0.0669(3) 0.086(2) Uani 1 1 d . . .
H60 H 0.5529 0.0970 0.0756 0.103 Uiso 1 1 calc R . .
C61 C 0.6774(5) 0.1142(4) 0.0281(3) 0.0716(18) Uani 1 1 d . . .
H61 H 0.6869 0.0560 0.0109 0.086 Uiso 1 1 calc R . .
C62 C 0.7442(4) 0.1757(4) 0.0138(3) 0.0562(15) Uani 1 1 d . . .
H62 H 0.7985 0.1588 -0.0128 0.067 Uiso 1 1 calc R . .
C63 C 0.8877(4) 0.3109(3) -0.0435(2) 0.0431(13) Uani 1 1 d . . .
C64 C 0.8439(4) 0.2957(4) -0.0971(3) 0.0581(15) Uani 1 1 d . . .
H64 H 0.7751 0.3027 -0.0981 0.070 Uiso 1 1 calc R . .
C65 C 0.9001(5) 0.2702(4) -0.1498(3) 0.0652(17) Uani 1 1 d . . .
H65 H 0.8696 0.2602 -0.1861 0.078 Uiso 1 1 calc R . .
C66 C 1.0014(5) 0.2600(4) -0.1478(3) 0.075(2) Uani 1 1 d . . .
H66 H 1.0398 0.2425 -0.1831 0.089 Uiso 1 1 calc R . .
C67 C 1.0457(5) 0.2749(5) -0.0957(4) 0.083(2) Uani 1 1 d . . .
H67 H 1.1145 0.2671 -0.0948 0.099 Uiso 1 1 calc R . .
C68 C 0.9898(4) 0.3015(4) -0.0439(3) 0.0645(17) Uani 1 1 d . . .
H68 H 1.0212 0.3136 -0.0083 0.077 Uiso 1 1 calc R . .
C69 C 0.9639(5) 0.1680(4) 0.1183(3) 0.0566(15) Uani 1 1 d . . .
C70 C 0.8944(5) 0.1089(4) 0.1322(3) 0.0748(19) Uani 1 1 d . . .
H70 H 0.8344 0.1305 0.1523 0.090 Uiso 1 1 calc R . .
C71 C 0.9154(7) 0.0154(5) 0.1156(4) 0.095(3) Uani 1 1 d . . .
H71 H 0.8693 -0.0253 0.1240 0.114 Uiso 1 1 calc R . .
C72 C 1.0033(9) -0.0137(6) 0.0874(4) 0.111(3) Uani 1 1 d . . .
H72 H 1.0171 -0.0757 0.0774 0.133 Uiso 1 1 calc R . .
C73 C 1.0731(7) 0.0423(6) 0.0726(4) 0.108(3) Uani 1 1 d . . .
H73 H 1.1328 0.0197 0.0525 0.130 Uiso 1 1 calc R . .
C74 C 1.0524(5) 0.1337(4) 0.0884(3) 0.079(2) Uani 1 1 d . . .
H74 H 1.0991 0.1733 0.0787 0.094 Uiso 1 1 calc R . .
C75 C 1.0509(4) 0.3299(3) 0.1496(2) 0.0449(13) Uani 1 1 d . . .
C76 C 1.1223(4) 0.2786(4) 0.1841(3) 0.0605(16) Uani 1 1 d . . .
H76 H 1.1125 0.2202 0.1991 0.073 Uiso 1 1 calc R . .
C77 C 1.2089(5) 0.3141(5) 0.1963(3) 0.0711(18) Uani 1 1 d . . .
H77 H 1.2571 0.2786 0.2191 0.085 Uiso 1 1 calc R . .
C78 C 1.2246(6) 0.3992(6) 0.1758(3) 0.090(2) Uani 1 1 d . . .
H78 H 1.2832 0.4219 0.1841 0.108 Uiso 1 1 calc R . .
C79 C 1.1529(6) 0.4517(6) 0.1426(3) 0.092(2) Uani 1 1 d . . .
H79 H 1.1625 0.5110 0.1293 0.110 Uiso 1 1 calc R . .
C80 C 1.0665(5) 0.4177(4) 0.1286(3) 0.0670(17) Uani 1 1 d . . .
H80 H 1.0191 0.4534 0.1053 0.080 Uiso 1 1 calc R . .
C81 C 0.8605(4) 0.3011(3) 0.2043(2) 0.0475(13) Uani 1 1 d . . .
C82 C 0.8764(4) 0.2398(4) 0.2544(3) 0.0645(17) Uani 1 1 d . . .
H82 H 0.9245 0.1884 0.2513 0.077 Uiso 1 1 calc R . .
C83 C 0.8216(5) 0.2553(5) 0.3074(3) 0.081(2) Uani 1 1 d . . .
H83 H 0.8328 0.2144 0.3408 0.097 Uiso 1 1 calc R . .
C84 C 0.7503(5) 0.3297(5) 0.3129(3) 0.082(2) Uani 1 1 d . . .
H84 H 0.7125 0.3391 0.3495 0.099 Uiso 1 1 calc R . .
C85 C 0.7353(5) 0.3899(4) 0.2645(3) 0.0718(18) Uani 1 1 d . . .
H85 H 0.6882 0.4418 0.2685 0.086 Uiso 1 1 calc R . .
C86 C 0.7877(4) 0.3758(4) 0.2101(3) 0.0568(15) Uani 1 1 d . . .
H86 H 0.7744 0.4166 0.1769 0.068 Uiso 1 1 calc R . .
Cr1 Cr 0.44327(7) 0.95658(6) 0.18996(5) 0.0681(3) Uani 1 1 d . . .
Mn1 Mn 0.67258(6) 0.73094(6) 0.21713(4) 0.0547(3) Uani 1 1 d . . .
H1' H 0.6266 0.6817 0.1626 0.082 Uiso 1 1 d R . .
Mn2 Mn 0.50480(6) 0.66222(5) 0.19611(4) 0.0443(2) Uani 1 1 d . . .
Mn3 Mn 0.45048(6) 0.72258(6) 0.31096(4) 0.0547(3) Uani 1 1 d . . .
N1 N 0.1376(3) 0.2540(3) 0.38639(19) 0.0561(12) Uani 1 1 d . . .
N2 N 0.8870(3) 0.3525(3) 0.0810(2) 0.0533(12) Uani 1 1 d . . .
O1 O 0.2559(4) 0.8792(4) 0.1580(3) 0.1090(18) Uani 1 1 d . . .
O2 O 0.3589(5) 1.0040(4) 0.3186(3) 0.132(2) Uani 1 1 d . . .
O3 O 0.3529(5) 1.1392(4) 0.1386(4) 0.176(3) Uani 1 1 d . . .
O4 O 0.6302(5) 1.0328(4) 0.2230(3) 0.126(2) Uani 1 1 d . . .
O5 O 0.5292(4) 0.9100(4) 0.0613(3) 0.1017(17) Uani 1 1 d . . .
O6 O 0.7911(5) 0.8112(5) 0.3063(3) 0.158(3) Uani 1 1 d . . .
O7 O 0.7338(4) 0.8573(4) 0.1191(3) 0.117(2) Uani 1 1 d . . .
O8 O 0.8350(3) 0.5865(3) 0.1835(2) 0.0757(13) Uani 1 1 d . . .
O9 O 0.4289(3) 0.7296(3) 0.0763(2) 0.0801(14) Uani 1 1 d . . .
O10 O 0.5599(4) 0.4729(3) 0.1542(2) 0.0941(16) Uani 1 1 d . . .
O11 O 0.3080(3) 0.6068(3) 0.2251(2) 0.0892(15) Uani 1 1 d . . .
O12 O 0.3885(4) 0.5764(4) 0.3937(2) 0.1033(18) Uani 1 1 d . . .
O13 O 0.2451(4) 0.8160(4) 0.3079(2) 0.1014(18) Uani 1 1 d . . .
O14 O 0.4975(5) 0.8228(5) 0.4182(3) 0.145(3) Uani 1 1 d . . .
P1 P 0.19489(11) 0.34043(10) 0.39061(6) 0.0472(4) Uani 1 1 d . . .
P2 P 0.09557(11) 0.17344(10) 0.42370(7) 0.0497(4) Uani 1 1 d . . .
P3 P 0.81659(10) 0.34343(9) 0.02606(6) 0.0421(3) Uani 1 1 d . . .
P4 P 0.93660(11) 0.28907(9) 0.13467(7) 0.0459(4) Uani 1 1 d . . .
S1 S 0.51385(10) 0.80851(9) 0.23315(7) 0.0506(4) Uani 1 1 d . . .
S2 S 0.59629(11) 0.63197(10) 0.28450(6) 0.0539(4) Uani 1 1 d . . .
 
loop_
 _atom_site_aniso_label
 _atom_site_aniso_U_11
 _atom_site_aniso_U_22
 _atom_site_aniso_U_33
 _atom_site_aniso_U_23
 _atom_site_aniso_U_13
 _atom_site_aniso_U_12
C1 0.060(5) 0.063(4) 0.102(6) 0.006(4) 0.018(4) -0.001(4)
C2 0.080(4) 0.063(3) 0.154(6) -0.006(3) 0.038(4) -0.003(3)
C3 0.080(4) 0.063(3) 0.154(6) -0.006(3) 0.038(4) -0.003(3)
C4 0.080(6) 0.067(5) 0.109(6) -0.014(4) 0.021(5) -0.012(4)
C5 0.067(5) 0.054(4) 0.102(6) 0.003(4) 0.018(4) -0.005(3)
C6 0.068(5) 0.112(6) 0.108(6) -0.049(5) 0.008(4) -0.020(4)
C7 0.035(4) 0.061(4) 0.119(6) -0.011(4) 0.023(4) 0.006(3)
C8 0.044(4) 0.065(4) 0.059(4) -0.003(3) -0.004(3) -0.004(3)
C9 0.050(4) 0.049(3) 0.060(4) -0.006(3) -0.006(3) -0.005(3)
C10 0.057(4) 0.050(4) 0.052(4) -0.005(3) -0.011(3) 0.002(3)
C11 0.051(4) 0.061(4) 0.062(4) -0.008(3) -0.002(3) -0.008(3)
C12 0.055(4) 0.075(4) 0.065(4) -0.009(4) 0.003(3) -0.001(3)
C13 0.056(4) 0.075(4) 0.062(4) 0.005(3) 0.024(3) -0.011(4)
C14 0.073(5) 0.087(5) 0.090(6) -0.030(4) 0.011(4) -0.009(4)
C15 0.053(4) 0.059(4) 0.055(4) -0.008(3) -0.004(3) -0.013(3)
C16 0.067(5) 0.069(5) 0.120(6) -0.012(4) 0.013(4) -0.011(4)
C17 0.066(6) 0.099(6) 0.190(10) -0.056(6) 0.024(6) 0.000(5)
C18 0.063(6) 0.143(9) 0.146(8) -0.051(7) 0.026(5) -0.033(6)
C19 0.078(6) 0.132(8) 0.116(7) 0.010(6) 0.022(5) -0.036(6)
C20 0.061(4) 0.079(5) 0.099(5) 0.007(4) 0.010(4) -0.019(4)
C21 0.053(4) 0.052(3) 0.037(3) -0.001(2) 0.002(3) -0.007(3)
C22 0.064(4) 0.071(4) 0.036(3) -0.007(3) -0.003(3) -0.015(3)
C23 0.067(4) 0.097(5) 0.044(4) 0.003(4) -0.007(3) 0.001(4)
C24 0.092(6) 0.069(5) 0.063(4) 0.018(4) -0.018(4) 0.005(4)
C25 0.106(6) 0.059(4) 0.091(5) 0.010(4) -0.011(5) -0.022(4)
C26 0.077(4) 0.048(4) 0.067(4) 0.008(3) -0.018(3) -0.017(3)
C27 0.060(4) 0.050(3) 0.047(3) -0.002(3) -0.005(3) 0.000(3)
C28 0.078(5) 0.126(6) 0.062(5) -0.019(4) -0.024(4) 0.016(5)
C29 0.088(6) 0.183(9) 0.092(7) -0.028(6) -0.042(5) 0.024(6)
C30 0.135(8) 0.109(6) 0.051(5) -0.016(4) -0.020(5) 0.009(6)
C31 0.100(6) 0.102(6) 0.054(5) -0.013(4) -0.001(4) 0.004(5)
C32 0.076(5) 0.072(4) 0.046(4) -0.011(3) -0.008(3) -0.011(4)
C33 0.066(4) 0.036(3) 0.058(4) 0.004(3) -0.009(3) 0.000(3)
C34 0.069(4) 0.065(4) 0.058(4) -0.004(3) -0.004(3) 0.008(3)
C35 0.116(7) 0.079(5) 0.057(5) -0.019(4) -0.014(5) 0.024(5)
C36 0.155(9) 0.067(5) 0.078(6) -0.009(4) -0.040(6) -0.011(6)
C37 0.136(8) 0.068(5) 0.102(7) 0.009(5) -0.046(6) -0.043(5)
C38 0.090(5) 0.054(4) 0.064(4) 0.006(3) -0.011(4) -0.016(4)
C39 0.066(4) 0.046(3) 0.056(4) -0.005(3) 0.005(3) -0.008(3)
C40 0.066(4) 0.067(4) 0.066(4) 0.004(3) 0.002(3) -0.009(3)
C41 0.069(5) 0.075(5) 0.103(6) -0.019(4) 0.001(4) 0.005(4)
C42 0.093(6) 0.093(6) 0.094(6) -0.020(5) 0.041(5) -0.013(5)
C43 0.127(7) 0.077(5) 0.101(6) 0.001(4) 0.061(6) -0.004(5)
C44 0.105(6) 0.062(4) 0.069(4) 0.015(3) 0.028(4) 0.005(4)
C45 0.063(4) 0.059(4) 0.049(4) 0.002(3) -0.002(3) -0.013(3)
C46 0.105(6) 0.087(5) 0.064(5) 0.006(4) -0.027(4) -0.013(4)
C47 0.130(8) 0.143(9) 0.077(6) 0.004(6) -0.035(6) -0.018(7)
C48 0.118(8) 0.180(11) 0.102(8) 0.006(8) -0.056(6) 0.022(8)
C49 0.138(9) 0.142(8) 0.122(8) -0.012(7) -0.033(7) 0.073(7)
C50 0.092(6) 0.100(6) 0.076(5) -0.011(4) -0.012(4) 0.027(5)
C51 0.042(3) 0.040(3) 0.043(3) -0.001(2) -0.004(2) -0.001(2)
C52 0.075(4) 0.047(4) 0.076(4) -0.004(3) -0.032(4) -0.001(3)
C53 0.110(6) 0.040(4) 0.108(6) -0.008(4) -0.047(5) -0.005(4)
C54 0.081(5) 0.052(4) 0.097(5) 0.006(4) -0.010(4) 0.020(4)
C55 0.049(4) 0.064(4) 0.108(6) 0.006(4) -0.022(4) 0.005(3)
C56 0.056(4) 0.047(3) 0.080(4) 0.001(3) -0.015(3) -0.006(3)
C57 0.045(3) 0.045(3) 0.037(3) 0.003(2) -0.004(2) -0.005(3)
C58 0.069(4) 0.057(4) 0.066(4) -0.002(3) 0.012(3) -0.016(3)
C59 0.075(5) 0.084(5) 0.088(5) 0.004(4) 0.030(4) -0.018(4)
C60 0.098(6) 0.082(5) 0.083(5) 0.018(4) 0.010(5) -0.045(5)
C61 0.097(5) 0.044(3) 0.077(5) -0.001(3) -0.002(4) -0.023(4)
C62 0.061(4) 0.046(3) 0.061(4) -0.003(3) 0.001(3) -0.006(3)
C63 0.040(3) 0.041(3) 0.048(3) 0.004(2) 0.003(3) -0.005(2)
C64 0.042(3) 0.083(4) 0.048(4) -0.001(3) 0.001(3) -0.003(3)
C65 0.070(5) 0.083(4) 0.046(4) -0.004(3) 0.005(3) -0.021(4)
C66 0.072(5) 0.074(4) 0.075(5) 0.000(4) 0.035(4) -0.008(4)
C67 0.052(4) 0.109(6) 0.082(5) 0.000(4) 0.013(4) 0.000(4)
C68 0.045(4) 0.080(4) 0.070(4) -0.003(3) -0.007(3) -0.012(3)
C69 0.071(4) 0.043(3) 0.056(4) 0.000(3) -0.022(3) -0.003(3)
C70 0.092(5) 0.055(4) 0.082(5) 0.002(3) -0.033(4) -0.016(4)
C71 0.140(8) 0.055(5) 0.099(6) 0.016(4) -0.052(6) -0.033(5)
C72 0.181(11) 0.051(5) 0.100(7) -0.012(5) -0.042(7) 0.003(6)
C73 0.138(8) 0.069(5) 0.109(7) -0.034(5) 0.008(6) 0.022(5)
C74 0.089(5) 0.062(4) 0.082(5) -0.024(4) -0.005(4) 0.006(4)
C75 0.046(3) 0.048(3) 0.040(3) -0.006(3) -0.006(3) -0.001(3)
C76 0.059(4) 0.058(4) 0.064(4) -0.009(3) -0.016(3) -0.002(3)
C77 0.055(4) 0.088(5) 0.070(5) -0.022(4) -0.015(3) 0.001(4)
C78 0.071(5) 0.133(7) 0.077(5) -0.012(5) 0.001(4) -0.053(5)
C79 0.096(6) 0.109(6) 0.083(5) 0.013(5) -0.013(5) -0.058(5)
C80 0.073(5) 0.067(4) 0.065(4) 0.011(3) -0.012(3) -0.021(4)
C81 0.045(3) 0.043(3) 0.056(4) 0.002(3) -0.014(3) -0.007(3)
C82 0.061(4) 0.070(4) 0.056(4) 0.015(3) -0.003(3) 0.009(3)
C83 0.081(5) 0.098(5) 0.058(4) 0.023(4) -0.003(4) 0.007(4)
C84 0.068(5) 0.116(6) 0.061(5) -0.009(4) 0.004(4) -0.006(5)
C85 0.062(4) 0.069(4) 0.079(5) -0.004(4) 0.000(4) 0.011(3)
C86 0.057(4) 0.051(3) 0.060(4) 0.001(3) -0.012(3) 0.002(3)
Cr1 0.0581(6) 0.0423(5) 0.1013(8) -0.0052(5) 0.0225(6) -0.0039(5)
Mn1 0.0379(5) 0.0600(6) 0.0664(6) -0.0130(4) 0.0037(4) -0.0069(4)
Mn2 0.0395(5) 0.0437(5) 0.0489(5) -0.0038(4) -0.0017(4) -0.0015(4)
Mn3 0.0481(5) 0.0600(5) 0.0552(6) -0.0096(4) 0.0099(4) -0.0060(4)
N1 0.067(3) 0.056(3) 0.047(3) 0.001(2) 0.006(2) -0.020(2)
N2 0.058(3) 0.046(3) 0.055(3) 0.005(2) -0.025(2) 0.001(2)
O1 0.065(4) 0.121(5) 0.145(5) -0.015(4) 0.003(3) -0.025(3)
O2 0.147(5) 0.104(4) 0.143(5) -0.049(4) 0.074(4) -0.022(4)
O3 0.153(6) 0.072(4) 0.279(9) 0.051(5) 0.058(6) 0.041(4)
O4 0.098(5) 0.121(5) 0.170(6) -0.030(4) 0.000(4) -0.052(4)
O5 0.110(4) 0.109(4) 0.088(4) -0.002(3) 0.018(3) -0.030(3)
O6 0.130(6) 0.196(7) 0.166(7) -0.088(5) -0.037(5) -0.058(5)
O7 0.080(4) 0.099(4) 0.164(5) 0.037(4) 0.050(4) -0.012(3)
O8 0.051(3) 0.074(3) 0.097(3) -0.002(2) 0.002(2) 0.009(2)
O9 0.096(4) 0.074(3) 0.072(3) 0.010(2) -0.036(3) -0.011(3)
O10 0.117(4) 0.060(3) 0.100(4) -0.029(3) -0.019(3) 0.017(3)
O11 0.053(3) 0.118(4) 0.106(4) -0.013(3) -0.001(3) -0.042(3)
O12 0.110(4) 0.107(4) 0.095(4) 0.025(3) 0.015(3) -0.034(3)
O13 0.059(3) 0.117(4) 0.116(4) 0.020(3) 0.035(3) 0.015(3)
O14 0.134(5) 0.172(6) 0.135(5) -0.098(5) -0.003(4) -0.026(4)
P1 0.0514(9) 0.0489(8) 0.0420(8) -0.0019(7) 0.0004(7) -0.0098(7)
P2 0.0586(10) 0.0462(8) 0.0450(9) -0.0008(7) 0.0034(7) -0.0115(7)
P3 0.0412(8) 0.0391(7) 0.0458(8) 0.0003(6) -0.0045(6) -0.0043(6)
P4 0.0490(9) 0.0379(7) 0.0508(9) -0.0010(6) -0.0117(7) -0.0021(7)
S1 0.0423(8) 0.0441(8) 0.0648(9) -0.0102(7) 0.0105(7) -0.0056(6)
S2 0.0469(9) 0.0633(9) 0.0499(9) -0.0048(7) -0.0038(7) -0.0002(7)
 
_geom_special_details
;
 All esds (except the esd in the dihedral angle between two l.s. planes)
 are estimated using the full covariance matrix.  The cell esds are taken
 into account individually in the estimation of esds in distances, angles
 and torsion angles; correlations between esds in cell parameters are only
 used when they are defined by crystal symmetry.  An approximate (isotropic)
 treatment of cell esds is used for estimating esds involving l.s. planes.
;
 
loop_
 _geom_bond_atom_site_label_1
 _geom_bond_atom_site_label_2
 _geom_bond_distance
 _geom_bond_site_symmetry_2
 _geom_bond_publ_flag
C1 O1 1.131(8) . ?
C1 Cr1 1.907(8) . ?
C2 O2 1.145(9) . ?
C2 Cr1 1.890(9) . ?
C3 O3 1.163(8) . ?
C3 Cr1 1.829(8) . ?
C4 O4 1.120(8) . ?
C4 Cr1 1.911(9) . ?
C5 O5 1.127(7) . ?
C5 Cr1 1.912(8) . ?
C6 O6 1.144(8) . ?
C6 Mn1 1.791(8) . ?
C7 O7 1.139(7) . ?
C7 Mn1 1.805(7) . ?
C8 O8 1.146(6) . ?
C8 Mn1 1.785(6) . ?
C9 O9 1.142(6) . ?
C9 Mn2 1.789(6) . ?
C10 O10 1.158(6) . ?
C10 Mn2 1.771(6) . ?
C11 O11 1.140(6) . ?
C11 Mn2 1.813(6) . ?
C12 O12 1.139(7) . ?
C12 Mn3 1.799(7) . ?
C13 O13 1.154(7) . ?
C13 Mn3 1.792(7) . ?
C14 O14 1.156(8) . ?
C14 Mn3 1.764(8) . ?
C15 C16 1.371(8) . ?
C15 C20 1.391(8) . ?
C15 P1 1.786(6) . ?
C16 C17 1.384(10) . ?
C16 H16 0.9300 . ?
C17 C18 1.368(11) . ?
C17 H17 0.9300 . ?
C18 C19 1.355(11) . ?
C18 H18 0.9300 . ?
C19 C20 1.380(9) . ?
C19 H19 0.9300 . ?
C20 H20 0.9300 . ?
C21 C26 1.390(7) . ?
C21 C22 1.399(7) . ?
C21 P1 1.793(5) . ?
C22 C23 1.382(7) . ?
C22 H22 0.9300 . ?
C23 C24 1.371(9) . ?
C23 H23 0.9300 . ?
C24 C25 1.375(9) . ?
C24 H24 0.9300 . ?
C25 C26 1.377(8) . ?
C25 H25 0.9300 . ?
C26 H26 0.9300 . ?
C27 C28 1.361(8) . ?
C27 C32 1.370(8) . ?
C27 P1 1.796(6) . ?
C28 C29 1.394(10) . ?
C28 H28 0.9300 . ?
C29 C30 1.371(10) . ?
C29 H29 0.9300 . ?
C30 C31 1.355(10) . ?
C30 H30 0.9300 . ?
C31 C32 1.365(8) . ?
C31 H31 0.9300 . ?
C32 H32 0.9300 . ?
C33 C34 1.386(8) . ?
C33 C38 1.390(8) . ?
C33 P2 1.803(6) . ?
C34 C35 1.384(9) . ?
C34 H34 0.9300 . ?
C35 C36 1.347(11) . ?
C35 H35 0.9300 . ?
C36 C37 1.333(11) . ?
C36 H36 0.9300 . ?
C37 C38 1.387(9) . ?
C37 H37 0.9300 . ?
C38 H38 0.9300 . ?
C39 C44 1.375(7) . ?
C39 C40 1.390(7) . ?
C39 P2 1.793(6) . ?
C40 C41 1.386(8) . ?
C40 H40 0.9300 . ?
C41 C42 1.395(9) . ?
C41 H41 0.9300 . ?
C42 C43 1.353(9) . ?
C42 H42 0.9300 . ?
C43 C44 1.372(9) . ?
C43 H43 0.9300 . ?
C44 H44 0.9300 . ?
C45 C50 1.363(8) . ?
C45 C46 1.367(8) . ?
C45 P2 1.798(6) . ?
C46 C47 1.386(10) . ?
C46 H46 0.9300 . ?
C47 C48 1.344(12) . ?
C47 H47 0.9300 . ?
C48 C49 1.339(12) . ?
C48 H48 0.9300 . ?
C49 C50 1.406(10) . ?
C49 H49 0.9300 . ?
C50 H50 0.9300 . ?
C51 C52 1.365(7) . ?
C51 C56 1.382(7) . ?
C51 P3 1.794(5) . ?
C52 C53 1.369(7) . ?
C52 H52 0.9300 . ?
C53 C54 1.357(9) . ?
C53 H53 0.9300 . ?
C54 C55 1.364(9) . ?
C54 H54 0.9300 . ?
C55 C56 1.380(7) . ?
C55 H55 0.9300 . ?
C56 H56 0.9300 . ?
C57 C62 1.382(7) . ?
C57 C58 1.387(7) . ?
C57 P3 1.789(5) . ?
C58 C59 1.373(8) . ?
C58 H58 0.9300 . ?
C59 C60 1.377(9) . ?
C59 H59 0.9300 . ?
C60 C61 1.354(9) . ?
C60 H60 0.9300 . ?
C61 C62 1.381(8) . ?
C61 H61 0.9300 . ?
C62 H62 0.9300 . ?
C63 C64 1.365(7) . ?
C63 C68 1.378(7) . ?
C63 P3 1.799(5) . ?
C64 C65 1.380(8) . ?
C64 H64 0.9300 . ?
C65 C66 1.369(8) . ?
C65 H65 0.9300 . ?
C66 C67 1.339(9) . ?
C66 H66 0.9300 . ?
C67 C68 1.366(8) . ?
C67 H67 0.9300 . ?
C68 H68 0.9300 . ?
C69 C74 1.383(8) . ?
C69 C70 1.384(8) . ?
C69 P4 1.803(6) . ?
C70 C71 1.413(9) . ?
C70 H70 0.9300 . ?
C71 C72 1.344(11) . ?
C71 H71 0.9300 . ?
C72 C73 1.358(12) . ?
C72 H72 0.9300 . ?
C73 C74 1.379(9) . ?
C73 H73 0.9300 . ?
C74 H74 0.9300 . ?
C75 C76 1.378(7) . ?
C75 C80 1.389(7) . ?
C75 P4 1.784(5) . ?
C76 C77 1.388(8) . ?
C76 H76 0.9300 . ?
C77 C78 1.349(9) . ?
C77 H77 0.9300 . ?
C78 C79 1.373(9) . ?
C78 H78 0.9300 . ?
C79 C80 1.385(9) . ?
C79 H79 0.9300 . ?
C80 H80 0.9300 . ?
C81 C86 1.378(7) . ?
C81 C82 1.394(7) . ?
C81 P4 1.794(6) . ?
C82 C83 1.353(8) . ?
C82 H82 0.9300 . ?
C83 C84 1.361(9) . ?
C83 H83 0.9300 . ?
C84 C85 1.355(8) . ?
C84 H84 0.9300 . ?
C85 C86 1.357(8) . ?
C85 H85 0.9300 . ?
C86 H86 0.9300 . ?
Cr1 S1 2.4267(16) . ?
Mn1 S1 2.3196(16) . ?
Mn1 S2 2.3365(17) . ?
Mn1 Mn2 2.6755(12) . ?
Mn1 H1' 1.5923 . ?
Mn2 S1 2.3263(16) . ?
Mn2 S2 2.3277(16) . ?
Mn2 Mn3 2.7055(11) . ?
Mn2 H1' 1.8360 . ?
Mn3 S1 2.2835(16) . ?
Mn3 S2 2.2955(16) . ?
N1 P2 1.567(4) . ?
N1 P1 1.578(5) . ?
N2 P3 1.578(4) . ?
N2 P4 1.582(4) . ?
 
loop_
 _geom_angle_atom_site_label_1
 _geom_angle_atom_site_label_2
 _geom_angle_atom_site_label_3
 _geom_angle
 _geom_angle_site_symmetry_1
 _geom_angle_site_symmetry_3
 _geom_angle_publ_flag
O1 C1 Cr1 177.8(7) . . ?
O2 C2 Cr1 178.7(8) . . ?
O3 C3 Cr1 178.4(7) . . ?
O4 C4 Cr1 178.5(7) . . ?
O5 C5 Cr1 177.5(6) . . ?
O6 C6 Mn1 176.3(7) . . ?
O7 C7 Mn1 178.3(6) . . ?
O8 C8 Mn1 178.1(6) . . ?
O9 C9 Mn2 177.7(5) . . ?
O10 C10 Mn2 178.7(6) . . ?
O11 C11 Mn2 168.7(6) . . ?
O12 C12 Mn3 177.0(6) . . ?
O13 C13 Mn3 178.3(6) . . ?
O14 C14 Mn3 178.8(8) . . ?
C16 C15 C20 118.6(6) . . ?
C16 C15 P1 120.0(5) . . ?
C20 C15 P1 121.4(5) . . ?
C15 C16 C17 120.8(7) . . ?
C15 C16 H16 119.6 . . ?
C17 C16 H16 119.6 . . ?
C18 C17 C16 120.0(8) . . ?
C18 C17 H17 120.0 . . ?
C16 C17 H17 120.0 . . ?
C19 C18 C17 119.8(8) . . ?
C19 C18 H18 120.1 . . ?
C17 C18 H18 120.1 . . ?
C18 C19 C20 120.9(8) . . ?
C18 C19 H19 119.5 . . ?
C20 C19 H19 119.5 . . ?
C19 C20 C15 119.9(7) . . ?
C19 C20 H20 120.1 . . ?
C15 C20 H20 120.1 . . ?
C26 C21 C22 120.3(5) . . ?
C26 C21 P1 120.7(4) . . ?
C22 C21 P1 119.0(4) . . ?
C23 C22 C21 119.3(6) . . ?
C23 C22 H22 120.3 . . ?
C21 C22 H22 120.3 . . ?
C24 C23 C22 120.3(6) . . ?
C24 C23 H23 119.8 . . ?
C22 C23 H23 119.8 . . ?
C23 C24 C25 120.1(6) . . ?
C23 C24 H24 120.0 . . ?
C25 C24 H24 120.0 . . ?
C26 C25 C24 121.3(6) . . ?
C26 C25 H25 119.4 . . ?
C24 C25 H25 119.4 . . ?
C25 C26 C21 118.7(6) . . ?
C25 C26 H26 120.7 . . ?
C21 C26 H26 120.7 . . ?
C28 C27 C32 120.1(6) . . ?
C28 C27 P1 121.4(5) . . ?
C32 C27 P1 118.4(5) . . ?
C27 C28 C29 118.7(7) . . ?
C27 C28 H28 120.6 . . ?
C29 C28 H28 120.6 . . ?
C30 C29 C28 119.7(7) . . ?
C30 C29 H29 120.2 . . ?
C28 C29 H29 120.2 . . ?
C31 C30 C29 121.5(7) . . ?
C31 C30 H30 119.3 . . ?
C29 C30 H30 119.3 . . ?
C30 C31 C32 118.3(7) . . ?
C30 C31 H31 120.9 . . ?
C32 C31 H31 120.9 . . ?
C31 C32 C27 121.7(6) . . ?
C31 C32 H32 119.2 . . ?
C27 C32 H32 119.2 . . ?
C34 C33 C38 117.7(6) . . ?
C34 C33 P2 120.1(5) . . ?
C38 C33 P2 122.1(5) . . ?
C35 C34 C33 120.8(7) . . ?
C35 C34 H34 119.6 . . ?
C33 C34 H34 119.6 . . ?
C36 C35 C34 119.9(8) . . ?
C36 C35 H35 120.0 . . ?
C34 C35 H35 120.0 . . ?
C37 C36 C35 120.7(8) . . ?
C37 C36 H36 119.7 . . ?
C35 C36 H36 119.7 . . ?
C36 C37 C38 121.3(8) . . ?
C36 C37 H37 119.3 . . ?
C38 C37 H37 119.3 . . ?
C37 C38 C33 119.5(7) . . ?
C37 C38 H38 120.2 . . ?
C33 C38 H38 120.2 . . ?
C44 C39 C40 118.9(6) . . ?
C44 C39 P2 121.9(5) . . ?
C40 C39 P2 119.2(4) . . ?
C41 C40 C39 120.8(6) . . ?
C41 C40 H40 119.6 . . ?
C39 C40 H40 119.6 . . ?
C40 C41 C42 118.6(7) . . ?
C40 C41 H41 120.7 . . ?
C42 C41 H41 120.7 . . ?
C43 C42 C41 120.3(7) . . ?
C43 C42 H42 119.8 . . ?
C41 C42 H42 119.8 . . ?
C42 C43 C44 121.0(7) . . ?
C42 C43 H43 119.5 . . ?
C44 C43 H43 119.5 . . ?
C43 C44 C39 120.4(6) . . ?
C43 C44 H44 119.8 . . ?
C39 C44 H44 119.8 . . ?
C50 C45 C46 120.2(6) . . ?
C50 C45 P2 120.4(5) . . ?
C46 C45 P2 119.3(5) . . ?
C45 C46 C47 120.3(8) . . ?
C45 C46 H46 119.8 . . ?
C47 C46 H46 119.8 . . ?
C48 C47 C46 119.1(9) . . ?
C48 C47 H47 120.4 . . ?
C46 C47 H47 120.4 . . ?
C49 C48 C47 121.7(9) . . ?
C49 C48 H48 119.1 . . ?
C47 C48 H48 119.1 . . ?
C48 C49 C50 120.0(9) . . ?
C48 C49 H49 120.0 . . ?
C50 C49 H49 120.0 . . ?
C45 C50 C49 118.6(8) . . ?
C45 C50 H50 120.7 . . ?
C49 C50 H50 120.7 . . ?
C52 C51 C56 118.0(5) . . ?
C52 C51 P3 120.7(4) . . ?
C56 C51 P3 121.3(4) . . ?
C51 C52 C53 121.8(6) . . ?
C51 C52 H52 119.1 . . ?
C53 C52 H52 119.1 . . ?
C54 C53 C52 119.1(6) . . ?
C54 C53 H53 120.4 . . ?
C52 C53 H53 120.4 . . ?
C53 C54 C55 121.3(6) . . ?
C53 C54 H54 119.4 . . ?
C55 C54 H54 119.4 . . ?
C54 C55 C56 118.9(6) . . ?
C54 C55 H55 120.6 . . ?
C56 C55 H55 120.6 . . ?
C55 C56 C51 120.9(6) . . ?
C55 C56 H56 119.6 . . ?
C51 C56 H56 119.6 . . ?
C62 C57 C58 119.4(5) . . ?
C62 C57 P3 122.5(4) . . ?
C58 C57 P3 118.0(4) . . ?
C59 C58 C57 119.8(6) . . ?
C59 C58 H58 120.1 . . ?
C57 C58 H58 120.1 . . ?
C58 C59 C60 120.2(6) . . ?
C58 C59 H59 119.9 . . ?
C60 C59 H59 119.9 . . ?
C61 C60 C59 120.3(6) . . ?
C61 C60 H60 119.8 . . ?
C59 C60 H60 119.8 . . ?
C60 C61 C62 120.4(6) . . ?
C60 C61 H61 119.8 . . ?
C62 C61 H61 119.8 . . ?
C61 C62 C57 119.9(6) . . ?
C61 C62 H62 120.1 . . ?
C57 C62 H62 120.1 . . ?
C64 C63 C68 118.0(5) . . ?
C64 C63 P3 122.1(4) . . ?
C68 C63 P3 119.9(4) . . ?
C63 C64 C65 121.0(5) . . ?
C63 C64 H64 119.5 . . ?
C65 C64 H64 119.5 . . ?
C66 C65 C64 119.1(6) . . ?
C66 C65 H65 120.5 . . ?
C64 C65 H65 120.5 . . ?
C67 C66 C65 120.7(6) . . ?
C67 C66 H66 119.7 . . ?
C65 C66 H66 119.7 . . ?
C66 C67 C68 120.1(6) . . ?
C66 C67 H67 120.0 . . ?
C68 C67 H67 120.0 . . ?
C67 C68 C63 121.1(6) . . ?
C67 C68 H68 119.4 . . ?
C63 C68 H68 119.4 . . ?
C74 C69 C70 118.9(6) . . ?
C74 C69 P4 120.5(5) . . ?
C70 C69 P4 120.4(5) . . ?
C69 C70 C71 119.3(7) . . ?
C69 C70 H70 120.4 . . ?
C71 C70 H70 120.4 . . ?
C72 C71 C70 118.7(8) . . ?
C72 C71 H71 120.6 . . ?
C70 C71 H71 120.6 . . ?
C71 C72 C73 123.7(8) . . ?
C71 C72 H72 118.2 . . ?
C73 C72 H72 118.2 . . ?
C72 C73 C74 117.6(8) . . ?
C72 C73 H73 121.2 . . ?
C74 C73 H73 121.2 . . ?
C73 C74 C69 121.7(8) . . ?
C73 C74 H74 119.1 . . ?
C69 C74 H74 119.1 . . ?
C76 C75 C80 118.9(5) . . ?
C76 C75 P4 121.8(4) . . ?
C80 C75 P4 119.2(4) . . ?
C75 C76 C77 120.0(6) . . ?
C75 C76 H76 120.0 . . ?
C77 C76 H76 120.0 . . ?
C78 C77 C76 121.3(6) . . ?
C78 C77 H77 119.3 . . ?
C76 C77 H77 119.3 . . ?
C77 C78 C79 119.1(7) . . ?
C77 C78 H78 120.4 . . ?
C79 C78 H78 120.4 . . ?
C78 C79 C80 121.0(7) . . ?
C78 C79 H79 119.5 . . ?
C80 C79 H79 119.5 . . ?
C79 C80 C75 119.6(6) . . ?
C79 C80 H80 120.2 . . ?
C75 C80 H80 120.2 . . ?
C86 C81 C82 118.6(5) . . ?
C86 C81 P4 119.5(4) . . ?
C82 C81 P4 121.8(4) . . ?
C83 C82 C81 119.7(6) . . ?
C83 C82 H82 120.2 . . ?
C81 C82 H82 120.2 . . ?
C82 C83 C84 121.3(6) . . ?
C82 C83 H83 119.3 . . ?
C84 C83 H83 119.3 . . ?
C85 C84 C83 119.1(6) . . ?
C85 C84 H84 120.4 . . ?
C83 C84 H84 120.4 . . ?
C84 C85 C86 121.3(6) . . ?
C84 C85 H85 119.3 . . ?
C86 C85 H85 119.3 . . ?
C85 C86 C81 120.0(5) . . ?
C85 C86 H86 120.0 . . ?
C81 C86 H86 120.0 . . ?
C3 Cr1 C2 91.3(3) . . ?
C3 Cr1 C1 88.4(3) . . ?
C2 Cr1 C1 90.5(3) . . ?
C3 Cr1 C5 89.7(3) . . ?
C2 Cr1 C5 179.0(3) . . ?
C1 Cr1 C5 89.6(3) . . ?
C3 Cr1 C4 93.1(3) . . ?
C2 Cr1 C4 89.1(3) . . ?
C1 Cr1 C4 178.4(3) . . ?
C5 Cr1 C4 90.8(3) . . ?
C3 Cr1 S1 178.2(2) . . ?
C2 Cr1 S1 87.2(2) . . ?
C1 Cr1 S1 90.6(2) . . ?
C5 Cr1 S1 91.79(19) . . ?
C4 Cr1 S1 87.9(2) . . ?
C8 Mn1 C6 93.6(3) . . ?
C8 Mn1 C7 92.8(3) . . ?
C6 Mn1 C7 91.4(4) . . ?
C8 Mn1 S1 161.63(19) . . ?
C6 Mn1 S1 102.6(2) . . ?
C7 Mn1 S1 95.27(18) . . ?
C8 Mn1 S2 92.76(19) . . ?
C6 Mn1 S2 98.3(3) . . ?
C7 Mn1 S2 168.4(2) . . ?
S1 Mn1 S2 76.59(5) . . ?
C8 Mn1 Mn2 106.67(19) . . ?
C6 Mn1 Mn2 146.1(2) . . ?
C7 Mn1 Mn2 113.8(2) . . ?
S1 Mn1 Mn2 54.96(4) . . ?
S2 Mn1 Mn2 54.84(4) . . ?
C8 Mn1 H1' 78.9 . . ?
C6 Mn1 H1' 171.2 . . ?
C7 Mn1 H1' 84.6 . . ?
S1 Mn1 H1' 85.5 . . ?
S2 Mn1 H1' 86.6 . . ?
Mn2 Mn1 H1' 42.1 . . ?
C10 Mn2 C9 94.5(2) . . ?
C10 Mn2 C11 89.2(3) . . ?
C9 Mn2 C11 90.3(3) . . ?
C10 Mn2 S1 161.65(19) . . ?
C9 Mn2 S1 93.89(18) . . ?
C11 Mn2 S1 107.07(19) . . ?
C10 Mn2 S2 91.51(18) . . ?
C9 Mn2 S2 164.80(19) . . ?
C11 Mn2 S2 103.77(19) . . ?
S1 Mn2 S2 76.63(6) . . ?
C10 Mn2 Mn1 107.00(19) . . ?
C9 Mn2 Mn1 109.67(18) . . ?
C11 Mn2 Mn1 152.67(19) . . ?
S1 Mn2 Mn1 54.72(4) . . ?
S2 Mn2 Mn1 55.15(5) . . ?
C10 Mn2 Mn3 129.29(18) . . ?
C9 Mn2 Mn3 129.22(18) . . ?
C11 Mn2 Mn3 69.18(19) . . ?
S1 Mn2 Mn3 53.33(4) . . ?
S2 Mn2 Mn3 53.63(4) . . ?
Mn1 Mn2 Mn3 83.60(3) . . ?
C10 Mn2 H1' 84.2 . . ?
C9 Mn2 H1' 85.0 . . ?
C11 Mn2 H1' 171.6 . . ?
S1 Mn2 H1' 80.3 . . ?
S2 Mn2 H1' 81.7 . . ?
Mn1 Mn2 H1' 35.5 . . ?
Mn3 Mn2 H1' 119.1 . . ?
C14 Mn3 C13 93.2(3) . . ?
C14 Mn3 C12 91.3(3) . . ?
C13 Mn3 C12 91.6(3) . . ?
C14 Mn3 S1 99.9(2) . . ?
C13 Mn3 S1 96.05(18) . . ?
C12 Mn3 S1 166.0(2) . . ?
C14 Mn3 S2 104.5(2) . . ?
C13 Mn3 S2 162.0(2) . . ?
C12 Mn3 S2 91.05(19) . . ?
S1 Mn3 S2 78.12(6) . . ?
C14 Mn3 Mn2 147.7(2) . . ?
C13 Mn3 Mn2 108.0(2) . . ?
C12 Mn3 Mn2 111.6(2) . . ?
S1 Mn3 Mn2 54.80(4) . . ?
S2 Mn3 Mn2 54.74(4) . . ?
P2 N1 P1 145.2(3) . . ?
P3 N2 P4 138.0(3) . . ?
N1 P1 C15 109.3(3) . . ?
N1 P1 C21 108.4(3) . . ?
C15 P1 C21 109.3(3) . . ?
N1 P1 C27 115.0(2) . . ?
C15 P1 C27 108.6(3) . . ?
C21 P1 C27 106.1(2) . . ?
N1 P2 C39 113.2(3) . . ?
N1 P2 C45 113.9(3) . . ?
C39 P2 C45 107.3(3) . . ?
N1 P2 C33 106.9(3) . . ?
C39 P2 C33 107.6(3) . . ?
C45 P2 C33 107.7(3) . . ?
N2 P3 C57 115.3(2) . . ?
N2 P3 C51 107.2(2) . . ?
C57 P3 C51 108.0(2) . . ?
N2 P3 C63 110.8(2) . . ?
C57 P3 C63 107.2(2) . . ?
C51 P3 C63 108.2(2) . . ?
N2 P4 C75 107.1(2) . . ?
N2 P4 C81 110.5(2) . . ?
C75 P4 C81 107.4(2) . . ?
N2 P4 C69 115.6(2) . . ?
C75 P4 C69 107.6(3) . . ?
C81 P4 C69 108.4(3) . . ?
Mn3 S1 Mn1 102.38(6) . . ?
Mn3 S1 Mn2 71.87(5) . . ?
Mn1 S1 Mn2 70.32(5) . . ?
Mn3 S1 Cr1 128.56(6) . . ?
Mn1 S1 Cr1 128.40(7) . . ?
Mn2 S1 Cr1 128.03(7) . . ?
Mn3 S2 Mn2 71.63(5) . . ?
Mn3 S2 Mn1 101.49(6) . . ?
Mn2 S2 Mn1 70.00(5) . . ?
 
_diffrn_measured_fraction_theta_max    0.989
_diffrn_reflns_theta_full              24.98
_diffrn_measured_fraction_theta_full   0.989
_refine_diff_density_max    0.433
_refine_diff_density_min   -0.656
_refine_diff_density_rms    0.146

#=============================================END
  
data_1b
  
_audit_creation_method            SHELXL-97 
_chemical_name_systematic 
; 
 ? 
; 
_chemical_name_common             ? 
_chemical_melting_point           ? 
_chemical_formula_moiety          'C62 H41 Cr Mn3 O14 P2 Se2' 
_chemical_formula_sum              'C62 H41 Cr Mn3 O14 P2 Se2' 
_chemical_formula_weight          1446.63 
  
loop_ 
 _atom_type_symbol 
 _atom_type_description 
 _atom_type_scat_dispersion_real 
 _atom_type_scat_dispersion_imag 
 _atom_type_scat_source 
 'C'  'C'   0.0033   0.0016 
 'International Tables Vol C Tables 4.2.6.8 and 6.1.1.4' 
 'H'  'H'   0.0000   0.0000 
 'International Tables Vol C Tables 4.2.6.8 and 6.1.1.4' 
 'O'  'O'   0.0106   0.0060 
 'International Tables Vol C Tables 4.2.6.8 and 6.1.1.4' 
 'P'  'P'   0.1023   0.0942 
 'International Tables Vol C Tables 4.2.6.8 and 6.1.1.4' 
 'Cr'  'Cr'   0.3209   0.6236 
 'International Tables Vol C Tables 4.2.6.8 and 6.1.1.4' 
 'Mn'  'Mn'   0.3368   0.7283 
 'International Tables Vol C Tables 4.2.6.8 and 6.1.1.4' 
 'Se'  'Se'  -0.0929   2.2259 
 'International Tables Vol C Tables 4.2.6.8 and 6.1.1.4' 
  
_symmetry_cell_setting            Orthorhombic 
_symmetry_space_group_name_H-M    Pbca 
  
loop_ 
 _symmetry_equiv_pos_as_xyz 
 'x, y, z' 
 '-x+1/2, -y, z+1/2' 
 '-x, y+1/2, -z+1/2' 
 'x+1/2, -y+1/2, -z' 
 '-x, -y, -z' 
 'x-1/2, y, -z-1/2' 
 'x, -y-1/2, z-1/2' 
 '-x-1/2, y-1/2, z' 
  
_cell_length_a                    19.3174(3) 
_cell_length_b                    24.2509(4) 
_cell_length_c                    26.8237(1) 
_cell_angle_alpha                 90.00 
_cell_angle_beta                  90.00 
_cell_angle_gamma                 90.00 
_cell_volume                      12565.9(3) 
_cell_formula_units_Z             8 
_cell_measurement_temperature     298(2) 
_cell_measurement_reflns_used     8192 
_cell_measurement_theta_min       1.00 
_cell_measurement_theta_max       25.00 
  
_exptl_crystal_description        palte 
_exptl_crystal_colour             red 
_exptl_crystal_size_max           0.50 
_exptl_crystal_size_mid           0.15 
_exptl_crystal_size_min           0.02 
_exptl_crystal_density_meas       not_measured 
_exptl_crystal_density_diffrn     1.529 
_exptl_crystal_density_method     'not measured' 
_exptl_crystal_F_000              5776 
_exptl_absorpt_coefficient_mu     2.029 
_exptl_absorpt_correction_type    multi-scan 
_exptl_absorpt_correction_T_min   0.5495 
_exptl_absorpt_correction_T_max   0.7199 
_exptl_absorpt_process_details    ? 
  
_exptl_special_details 
; 
 ? 
; 
  
_diffrn_ambient_temperature       298(2) 
_diffrn_radiation_wavelength      0.71073 
_diffrn_radiation_type            MoK\a 
_diffrn_radiation_source          'fine-focus sealed tube' 
_diffrn_radiation_monochromator   graphite 
_diffrn_measurement_device_type   ? 
_diffrn_measurement_method        '\w scans' 
_diffrn_detector_area_resol_mean  ? 
_diffrn_standards_number          ? 
_diffrn_standards_interval_count  ? 
_diffrn_standards_interval_time   ? 
_diffrn_standards_decay_%         ? 
_diffrn_reflns_number             59811 
_diffrn_reflns_av_R_equivalents   0.1148 
_diffrn_reflns_av_sigmaI/netI     0.0698 
_diffrn_reflns_limit_h_min        -22 
_diffrn_reflns_limit_h_max        22 
_diffrn_reflns_limit_k_min        -28 
_diffrn_reflns_limit_k_max        28 
_diffrn_reflns_limit_l_min        -31 
_diffrn_reflns_limit_l_max        31 
_diffrn_reflns_theta_min          1.52 
_diffrn_reflns_theta_max          25.00 
_reflns_number_total              11049 
_reflns_number_gt                 6562 
_reflns_threshold_expression      >2sigma(I) 
  
_computing_data_collection        'Siemens SMART' 
_computing_cell_refinement        'Siemens SAINT' 
_computing_data_reduction         'Siemens SAINT' 
_computing_structure_solution     'SHELXS-97 (Sheldrick, 1990)' 
_computing_structure_refinement   'SHELXL-97 (Sheldrick, 1997)' 
_computing_molecular_graphics     'Siemens SHELXTL' 
_computing_publication_material   'Siemens SHELXTL' 
  
_refine_special_details 
; 
 Refinement of F^2^ against ALL reflections.  The weighted R-factor wR and 
 goodness of fit S are based on F^2^, conventional R-factors R are based 
 on F, with F set to zero for negative F^2^. The threshold expression of 
 F^2^ > 2sigma(F^2^) is used only for calculating R-factors(gt) etc. and is 
 not relevant to the choice of reflections for refinement.  R-factors based 
 on F^2^ are statistically about twice as large as those based on F, and R- 
 factors based on ALL data will be even larger. 
; 
  
_refine_ls_structure_factor_coef  Fsqd 
_refine_ls_matrix_type            full 
_refine_ls_weighting_scheme       calc 
_refine_ls_weighting_details 
 'calc w=1/[\s^2^(Fo^2^)+(0.0221P)^2^+11.6130P] where P=(Fo^2^+2Fc^2^)/3' 
_atom_sites_solution_primary      direct 
_atom_sites_solution_secondary    difmap 
_atom_sites_solution_hydrogens    geom 
_refine_ls_hydrogen_treatment     fixed 
_refine_ls_extinction_method      none 
_refine_ls_extinction_coef        ? 
_refine_ls_number_reflns          11049 
_refine_ls_number_parameters      761 
_refine_ls_number_restraints      0 
_refine_ls_R_factor_all           0.1178 
_refine_ls_R_factor_gt            0.0554 
_refine_ls_wR_factor_ref          0.0989 
_refine_ls_wR_factor_gt           0.0807 
_refine_ls_goodness_of_fit_ref    1.086 
_refine_ls_restrained_S_all       1.086 
_refine_ls_shift/su_max           0.002 
_refine_ls_shift/su_mean          0.000 
  
loop_ 
 _atom_site_label 
 _atom_site_type_symbol 
 _atom_site_fract_x 
 _atom_site_fract_y 
 _atom_site_fract_z 
 _atom_site_U_iso_or_equiv 
 _atom_site_adp_type 
 _atom_site_occupancy 
 _atom_site_symmetry_multiplicity 
 _atom_site_calc_flag 
 _atom_site_refinement_flags 
 _atom_site_disorder_assembly 
 _atom_site_disorder_group 
Se1 Se 0.38111(2) 0.20287(2) 0.646098(19) 0.04217(13) Uani 1 1 d . . . 
Se2 Se 0.36969(3) 0.32932(2) 0.64721(2) 0.05220(15) Uani 1 1 d . . . 
Cr Cr 0.39231(5) 0.09889(3) 0.64319(3) 0.0589(3) Uani 1 1 d . . . 
Mn1 Mn 0.29891(4) 0.25986(3) 0.69108(3) 0.0476(2) Uani 1 1 d . . . 
Mn2 Mn 0.31795(4) 0.26288(4) 0.58911(3) 0.0493(2) Uani 1 1 d . . . 
Mn3 Mn 0.45850(4) 0.27018(3) 0.61227(3) 0.0448(2) Uani 1 1 d . . . 
C1 C 0.3794(4) 0.1019(2) 0.7122(3) 0.0797(19) Uani 1 1 d . . . 
C2 C 0.4878(4) 0.1096(3) 0.6536(3) 0.078(2) Uani 1 1 d . . . 
C3 C 0.4045(4) 0.0239(3) 0.6424(3) 0.094(2) Uani 1 1 d . . . 
C4 C 0.4043(3) 0.1074(2) 0.5741(2) 0.0711(18) Uani 1 1 d . . . 
C5 C 0.2969(4) 0.0875(3) 0.6339(2) 0.0738(18) Uani 1 1 d . . . 
C6 C 0.5193(3) 0.2720(2) 0.6617(2) 0.0632(16) Uani 1 1 d . . . 
C7 C 0.3479(3) 0.2616(2) 0.7469(2) 0.0585(15) Uani 1 1 d . . . 
C8 C 0.2376(3) 0.3095(3) 0.7126(2) 0.0649(17) Uani 1 1 d . . . 
C9 C 0.2446(3) 0.2043(3) 0.7108(2) 0.0622(16) Uani 1 1 d . . . 
C10 C 0.5094(3) 0.2227(2) 0.5768(2) 0.0576(16) Uani 1 1 d . . . 
C11 C 0.4959(3) 0.3270(2) 0.5796(2) 0.0510(14) Uani 1 1 d . . . 
C12 C 0.2637(3) 0.3148(3) 0.5635(2) 0.0781(19) Uani 1 1 d . . . 
C13 C 0.3722(3) 0.2666(2) 0.5351(2) 0.0551(14) Uani 1 1 d . . . 
C14 C 0.2721(3) 0.2059(3) 0.5622(2) 0.0709(19) Uani 1 1 d . . . 
O1 O 0.3720(3) 0.1057(2) 0.75428(18) 0.137(2) Uani 1 1 d . . . 
O2 O 0.5450(3) 0.1158(2) 0.6608(2) 0.136(2) Uani 1 1 d . . . 
O3 O 0.4118(3) -0.0236(2) 0.6421(2) 0.145(2) Uani 1 1 d . . . 
O4 O 0.4115(3) 0.1150(2) 0.53233(17) 0.1067(18) Uani 1 1 d . . . 
O5 O 0.2389(3) 0.0786(2) 0.62858(18) 0.1153(19) Uani 1 1 d . . . 
O6 O 0.5573(2) 0.2743(2) 0.69461(18) 0.1075(17) Uani 1 1 d . . . 
O7 O 0.3806(2) 0.26362(19) 0.78317(17) 0.0959(15) Uani 1 1 d . . . 
O8 O 0.1991(2) 0.3421(2) 0.72732(19) 0.1085(18) Uani 1 1 d . . . 
O9 O 0.2101(2) 0.1680(2) 0.72354(16) 0.0970(16) Uani 1 1 d . . . 
O10 O 0.5442(2) 0.19360(19) 0.55335(17) 0.0914(14) Uani 1 1 d . . . 
O11 O 0.5217(2) 0.36329(18) 0.55844(15) 0.0812(13) Uani 1 1 d . . . 
O12 O 0.2278(2) 0.3482(2) 0.5456(2) 0.125(2) Uani 1 1 d . . . 
O13 O 0.3965(2) 0.26948(18) 0.49531(14) 0.0781(13) Uani 1 1 d . . . 
O14 O 0.2429(3) 0.1692(2) 0.54438(17) 0.1093(18) Uani 1 1 d . . . 
P1 P 0.37192(6) 0.41175(5) 0.87776(5) 0.0435(3) Uani 1 1 d . . . 
P2 P 0.39805(7) 0.06689(6) 0.89956(5) 0.0482(4) Uani 1 1 d . . . 
C15 C 0.3557(2) 0.4492(2) 0.82094(18) 0.0444(13) Uani 1 1 d . . . 
C16 C 0.3576(3) 0.5062(2) 0.8203(2) 0.0612(16) Uani 1 1 d . . . 
H16A H 0.3674 0.5257 0.8492 0.073 Uiso 1 1 calc R . . 
C17 C 0.3447(3) 0.5340(3) 0.7761(2) 0.083(2) Uani 1 1 d . . . 
H17A H 0.3453 0.5723 0.7756 0.100 Uiso 1 1 calc R . . 
C18 C 0.3311(3) 0.5054(3) 0.7333(2) 0.0792(19) Uani 1 1 d . . . 
H18A H 0.3233 0.5244 0.7037 0.095 Uiso 1 1 calc R . . 
C19 C 0.3289(3) 0.4489(3) 0.7337(2) 0.0749(19) Uani 1 1 d . . . 
H19A H 0.3196 0.4297 0.7045 0.090 Uiso 1 1 calc R . . 
C20 C 0.3404(3) 0.4206(2) 0.7772(2) 0.0632(16) Uani 1 1 d . . . 
H20A H 0.3380 0.3823 0.7775 0.076 Uiso 1 1 calc R . . 
C21 C 0.4541(2) 0.37722(19) 0.87595(19) 0.0415(12) Uani 1 1 d . . . 
C22 C 0.4828(3) 0.3602(2) 0.8314(2) 0.0574(15) Uani 1 1 d . . . 
H22A H 0.4600 0.3673 0.8015 0.069 Uiso 1 1 calc R . . 
C23 C 0.5449(3) 0.3327(2) 0.8313(2) 0.0692(17) Uani 1 1 d . . . 
H23A H 0.5636 0.3208 0.8013 0.083 Uiso 1 1 calc R . . 
C24 C 0.5799(3) 0.3226(2) 0.8752(3) 0.0664(17) Uani 1 1 d . . . 
H24A H 0.6226 0.3049 0.8746 0.080 Uiso 1 1 calc R . . 
C25 C 0.5514(3) 0.3386(2) 0.9197(2) 0.0639(16) Uani 1 1 d . . . 
H25A H 0.5741 0.3311 0.9496 0.077 Uiso 1 1 calc R . . 
C26 C 0.4887(3) 0.3661(2) 0.9198(2) 0.0560(15) Uani 1 1 d . . . 
H26A H 0.4695 0.3772 0.9500 0.067 Uiso 1 1 calc R . . 
C27 C 0.3034(3) 0.3633(2) 0.88763(19) 0.0488(13) Uani 1 1 d . . . 
C28 C 0.2372(3) 0.3759(3) 0.8715(2) 0.0727(18) Uani 1 1 d . . . 
H28A H 0.2296 0.4069 0.8518 0.087 Uiso 1 1 calc R . . 
C29 C 0.1825(3) 0.3425(3) 0.8849(3) 0.085(2) Uani 1 1 d . . . 
H29A H 0.1380 0.3509 0.8740 0.102 Uiso 1 1 calc R . . 
C30 C 0.1931(3) 0.2971(3) 0.9139(3) 0.0799(19) Uani 1 1 d . . . 
H30A H 0.1559 0.2753 0.9235 0.096 Uiso 1 1 calc R . . 
C31 C 0.2585(3) 0.2838(2) 0.9288(2) 0.0699(17) Uani 1 1 d . . . 
H31A H 0.2657 0.2525 0.9482 0.084 Uiso 1 1 calc R . . 
C32 C 0.3140(3) 0.3165(2) 0.9154(2) 0.0559(15) Uani 1 1 d . . . 
H32A H 0.3585 0.3069 0.9253 0.067 Uiso 1 1 calc R . . 
C33 C 0.3711(2) 0.4588(2) 0.92959(18) 0.0452(13) Uani 1 1 d . . . 
C34 C 0.4261(3) 0.4954(2) 0.9364(2) 0.0571(15) Uani 1 1 d . . . 
H34A H 0.4636 0.4949 0.9147 0.069 Uiso 1 1 calc R . . 
C35 C 0.4245(3) 0.5325(2) 0.9755(2) 0.0674(17) Uani 1 1 d . . . 
H35A H 0.4607 0.5572 0.9798 0.081 Uiso 1 1 calc R . . 
C36 C 0.3693(4) 0.5329(3) 1.0082(2) 0.0743(19) Uani 1 1 d . . . 
H36A H 0.3684 0.5578 1.0345 0.089 Uiso 1 1 calc R . . 
C37 C 0.3160(3) 0.4967(3) 1.0018(2) 0.0695(17) Uani 1 1 d . . . 
H37A H 0.2793 0.4969 1.0242 0.083 Uiso 1 1 calc R . . 
C38 C 0.3158(3) 0.4600(2) 0.9628(2) 0.0584(15) Uani 1 1 d . . . 
H38A H 0.2788 0.4359 0.9586 0.070 Uiso 1 1 calc R . . 
C39 C 0.4039(3) 0.0118(2) 0.85494(19) 0.0498(13) Uani 1 1 d . . . 
C40 C 0.3525(3) 0.0039(2) 0.8198(2) 0.0596(15) Uani 1 1 d . . . 
H40A H 0.3131 0.0259 0.8201 0.071 Uiso 1 1 calc R . . 
C41 C 0.3601(4) -0.0367(3) 0.7845(2) 0.0777(19) Uani 1 1 d . . . 
H41A H 0.3258 -0.0416 0.7606 0.093 Uiso 1 1 calc R . . 
C42 C 0.4173(4) -0.0701(3) 0.7839(3) 0.090(2) Uani 1 1 d . . . 
H42A H 0.4216 -0.0974 0.7598 0.108 Uiso 1 1 calc R . . 
C43 C 0.4683(4) -0.0629(3) 0.8191(3) 0.087(2) Uani 1 1 d . . . 
H43A H 0.5071 -0.0857 0.8191 0.104 Uiso 1 1 calc R . . 
C44 C 0.4618(3) -0.0223(2) 0.8543(2) 0.0729(18) Uani 1 1 d . . . 
H44A H 0.4965 -0.0174 0.8779 0.087 Uiso 1 1 calc R . . 
C45 C 0.3913(3) 0.0376(2) 0.96091(18) 0.0496(13) Uani 1 1 d . . . 
C46 C 0.3925(3) -0.0183(2) 0.9685(2) 0.0686(17) Uani 1 1 d . . . 
H46A H 0.3992 -0.0419 0.9416 0.082 Uiso 1 1 calc R . . 
C47 C 0.3839(4) -0.0399(3) 1.0157(3) 0.088(2) Uani 1 1 d . . . 
H47A H 0.3844 -0.0779 1.0203 0.106 Uiso 1 1 calc R . . 
C48 C 0.3749(3) -0.0063(3) 1.0552(2) 0.0775(19) Uani 1 1 d . . . 
H48A H 0.3706 -0.0210 1.0870 0.093 Uiso 1 1 calc R . . 
C49 C 0.3720(3) 0.0494(3) 1.0484(2) 0.0776(19) Uani 1 1 d . . . 
H49A H 0.3648 0.0725 1.0756 0.093 Uiso 1 1 calc R . . 
C50 C 0.3798(3) 0.0716(3) 1.0014(2) 0.0713(17) Uani 1 1 d . . . 
H50A H 0.3773 0.1096 0.9970 0.086 Uiso 1 1 calc R . . 
C51 C 0.3224(2) 0.1074(2) 0.88876(19) 0.0469(13) Uani 1 1 d . . . 
C52 C 0.2602(3) 0.0934(2) 0.9106(2) 0.0682(17) Uani 1 1 d . . . 
H52A H 0.2583 0.0642 0.9331 0.082 Uiso 1 1 calc R . . 
C53 C 0.2007(3) 0.1225(3) 0.8993(3) 0.0765(19) Uani 1 1 d . . . 
H53A H 0.1590 0.1132 0.9144 0.092 Uiso 1 1 calc R . . 
C54 C 0.2032(3) 0.1650(3) 0.8660(2) 0.0691(17) Uani 1 1 d . . . 
H54A H 0.1628 0.1835 0.8575 0.083 Uiso 1 1 calc R . . 
C55 C 0.2644(3) 0.1804(3) 0.8450(2) 0.0710(18) Uani 1 1 d . . . 
H55A H 0.2658 0.2100 0.8231 0.085 Uiso 1 1 calc R . . 
C56 C 0.3246(3) 0.1521(2) 0.8563(2) 0.0616(15) Uani 1 1 d . . . 
H56A H 0.3665 0.1629 0.8423 0.074 Uiso 1 1 calc R . . 
C57 C 0.4740(3) 0.1089(2) 0.8922(2) 0.0488(13) Uani 1 1 d . . . 
C58 C 0.5086(3) 0.1095(3) 0.8475(2) 0.093(2) Uani 1 1 d . . . 
H58A H 0.4931 0.0875 0.8214 0.112 Uiso 1 1 calc R . . 
C59 C 0.5657(4) 0.1423(4) 0.8410(3) 0.113(3) Uani 1 1 d . . . 
H59A H 0.5882 0.1426 0.8103 0.136 Uiso 1 1 calc R . . 
C60 C 0.5898(3) 0.1743(3) 0.8785(3) 0.093(2) Uani 1 1 d . . . 
H60A H 0.6288 0.1963 0.8739 0.112 Uiso 1 1 calc R . . 
C61 C 0.5570(4) 0.1740(3) 0.9223(3) 0.095(2) Uani 1 1 d . . . 
H61A H 0.5732 0.1961 0.9481 0.114 Uiso 1 1 calc R . . 
C62 C 0.4987(3) 0.1412(3) 0.9299(2) 0.081(2) Uani 1 1 d . . . 
H62A H 0.4766 0.1414 0.9607 0.097 Uiso 1 1 calc R . . 
H H 0.260(2) 0.2613(18) 0.6346(15) 0.064(14) Uiso 1 1 d . . . 
  
loop_ 
 _atom_site_aniso_label 
 _atom_site_aniso_U_11 
 _atom_site_aniso_U_22 
 _atom_site_aniso_U_33 
 _atom_site_aniso_U_23 
 _atom_site_aniso_U_13 
 _atom_site_aniso_U_12 
Se1 0.0390(3) 0.0407(3) 0.0468(3) 0.0012(3) 0.0033(3) -0.0048(2) 
Se2 0.0528(3) 0.0418(3) 0.0620(4) 0.0005(3) 0.0083(3) -0.0005(3) 
Cr 0.0714(6) 0.0434(5) 0.0618(6) -0.0019(5) 0.0161(5) -0.0033(5) 
Mn1 0.0389(4) 0.0570(5) 0.0468(5) -0.0018(4) 0.0055(4) -0.0034(4) 
Mn2 0.0382(4) 0.0612(5) 0.0483(5) 0.0073(4) 0.0000(4) -0.0033(4) 
Mn3 0.0353(4) 0.0468(5) 0.0523(5) 0.0032(4) 0.0033(4) -0.0069(4) 
C1 0.122(6) 0.052(4) 0.065(4) 0.005(3) 0.018(4) 0.009(4) 
C2 0.068(4) 0.058(4) 0.108(6) 0.009(4) 0.006(4) 0.013(4) 
C3 0.124(6) 0.060(5) 0.099(5) -0.003(4) 0.035(5) 0.006(4) 
C4 0.085(4) 0.063(4) 0.065(4) -0.022(3) 0.020(4) -0.027(3) 
C5 0.082(5) 0.079(5) 0.061(4) -0.003(3) 0.018(4) -0.024(4) 
C6 0.052(4) 0.070(4) 0.068(4) 0.007(3) 0.005(3) -0.014(3) 
C7 0.057(3) 0.060(4) 0.058(4) 0.001(3) 0.004(3) -0.021(3) 
C8 0.047(3) 0.086(5) 0.062(4) -0.013(3) 0.000(3) 0.000(3) 
C9 0.051(3) 0.086(5) 0.049(4) -0.002(3) -0.005(3) -0.012(3) 
C10 0.042(3) 0.061(4) 0.069(4) 0.001(3) 0.012(3) -0.018(3) 
C11 0.041(3) 0.054(4) 0.059(4) 0.002(3) -0.006(3) -0.007(3) 
C12 0.051(4) 0.105(6) 0.078(5) 0.022(4) 0.007(3) 0.004(4) 
C13 0.051(3) 0.059(4) 0.056(4) 0.001(3) -0.004(3) -0.011(3) 
C14 0.057(4) 0.108(6) 0.048(4) 0.014(4) -0.007(3) -0.023(4) 
O1 0.241(7) 0.109(4) 0.060(3) 0.012(3) 0.021(4) 0.012(4) 
O2 0.069(3) 0.133(5) 0.206(6) 0.033(4) -0.012(4) 0.014(4) 
O3 0.223(7) 0.052(3) 0.161(5) 0.000(4) 0.058(5) 0.022(4) 
O4 0.132(4) 0.125(4) 0.064(3) -0.028(3) 0.036(3) -0.047(3) 
O5 0.086(3) 0.150(5) 0.110(4) 0.000(3) 0.007(3) -0.057(4) 
O6 0.089(3) 0.146(5) 0.087(3) 0.015(3) -0.036(3) -0.024(3) 
O7 0.101(3) 0.113(4) 0.073(3) 0.010(3) -0.028(3) -0.039(3) 
O8 0.064(3) 0.125(4) 0.136(4) -0.054(3) 0.007(3) 0.032(3) 
O9 0.087(3) 0.119(4) 0.086(3) 0.015(3) 0.000(3) -0.058(3) 
O10 0.071(3) 0.098(4) 0.106(4) -0.022(3) 0.030(3) 0.008(3) 
O11 0.069(3) 0.081(3) 0.093(3) 0.037(3) -0.001(2) -0.028(2) 
O12 0.081(3) 0.157(5) 0.137(5) 0.066(4) -0.005(3) 0.048(3) 
O13 0.075(3) 0.113(4) 0.046(2) 0.003(2) 0.008(2) -0.031(3) 
O14 0.110(4) 0.137(5) 0.081(3) -0.004(3) -0.012(3) -0.070(4) 
P1 0.0386(7) 0.0429(8) 0.0490(8) -0.0021(6) -0.0017(7) 0.0010(6) 
P2 0.0456(8) 0.0481(9) 0.0508(9) -0.0055(7) 0.0009(7) -0.0021(7) 
C15 0.044(3) 0.046(3) 0.044(3) 0.000(3) -0.004(3) 0.000(3) 
C16 0.080(4) 0.049(4) 0.054(4) 0.001(3) -0.013(3) -0.003(3) 
C17 0.122(6) 0.056(4) 0.072(5) 0.012(4) -0.021(4) -0.006(4) 
C18 0.093(5) 0.087(5) 0.058(4) 0.020(4) -0.016(4) 0.007(4) 
C19 0.090(5) 0.088(5) 0.047(4) -0.012(4) -0.013(3) 0.016(4) 
C20 0.068(4) 0.059(4) 0.063(4) -0.007(3) -0.014(3) 0.010(3) 
C21 0.041(3) 0.036(3) 0.048(3) -0.001(2) 0.000(3) 0.000(2) 
C22 0.047(3) 0.066(4) 0.058(4) 0.006(3) 0.002(3) 0.007(3) 
C23 0.060(4) 0.077(5) 0.070(4) -0.007(4) 0.018(4) 0.016(4) 
C24 0.040(3) 0.064(4) 0.095(5) 0.005(4) 0.008(4) 0.012(3) 
C25 0.053(4) 0.071(4) 0.069(4) 0.005(3) -0.009(3) 0.017(3) 
C26 0.055(3) 0.058(4) 0.055(4) -0.001(3) 0.001(3) 0.004(3) 
C27 0.043(3) 0.047(3) 0.057(3) -0.005(3) -0.004(3) -0.002(3) 
C28 0.042(3) 0.067(4) 0.109(5) 0.012(4) -0.014(3) 0.000(3) 
C29 0.039(4) 0.082(5) 0.134(6) -0.002(5) -0.012(4) -0.001(4) 
C30 0.055(4) 0.079(5) 0.106(5) -0.005(4) 0.008(4) -0.020(4) 
C31 0.078(4) 0.061(4) 0.070(4) 0.011(3) -0.006(4) -0.022(4) 
C32 0.051(3) 0.055(4) 0.062(4) 0.002(3) -0.004(3) -0.003(3) 
C33 0.040(3) 0.047(3) 0.048(3) -0.003(3) -0.011(3) 0.006(3) 
C34 0.052(3) 0.058(4) 0.062(4) -0.004(3) -0.003(3) 0.006(3) 
C35 0.069(4) 0.060(4) 0.073(4) -0.010(4) -0.022(4) -0.002(3) 
C36 0.097(5) 0.068(5) 0.058(4) -0.019(3) -0.017(4) 0.025(4) 
C37 0.070(4) 0.076(5) 0.062(4) -0.012(4) 0.007(3) 0.019(4) 
C38 0.052(4) 0.062(4) 0.061(4) -0.001(3) -0.001(3) 0.011(3) 
C39 0.048(3) 0.052(3) 0.049(3) -0.003(3) 0.004(3) -0.005(3) 
C40 0.053(4) 0.065(4) 0.061(4) -0.006(3) 0.007(3) -0.012(3) 
C41 0.081(5) 0.086(5) 0.066(4) -0.018(4) -0.003(4) -0.022(4) 
C42 0.106(6) 0.076(5) 0.087(5) -0.041(4) 0.021(5) -0.019(5) 
C43 0.078(5) 0.089(5) 0.094(5) -0.030(4) 0.022(4) 0.017(4) 
C44 0.063(4) 0.083(5) 0.072(4) -0.029(4) -0.002(3) 0.017(4) 
C45 0.046(3) 0.059(4) 0.044(3) -0.008(3) -0.001(3) -0.004(3) 
C46 0.086(4) 0.054(4) 0.065(4) -0.004(3) 0.010(4) 0.017(4) 
C47 0.108(6) 0.070(5) 0.086(5) 0.015(4) 0.009(5) 0.018(4) 
C48 0.072(4) 0.100(6) 0.061(4) 0.021(4) 0.000(4) -0.006(4) 
C49 0.083(5) 0.095(6) 0.055(4) -0.017(4) 0.010(4) -0.016(4) 
C50 0.086(5) 0.063(4) 0.065(4) -0.005(3) 0.008(4) -0.015(4) 
C51 0.047(3) 0.043(3) 0.051(3) -0.005(3) 0.004(3) -0.005(3) 
C52 0.054(4) 0.053(4) 0.097(5) 0.019(3) 0.006(4) -0.008(3) 
C53 0.041(4) 0.070(5) 0.119(6) 0.006(4) 0.011(4) -0.011(3) 
C54 0.056(4) 0.062(4) 0.089(5) -0.011(4) -0.006(4) 0.008(3) 
C55 0.070(4) 0.075(5) 0.068(4) 0.020(3) 0.009(4) 0.012(4) 
C56 0.055(4) 0.073(4) 0.057(4) 0.000(3) 0.012(3) 0.006(3) 
C57 0.046(3) 0.048(3) 0.053(3) 0.002(3) -0.002(3) 0.000(3) 
C58 0.075(4) 0.124(6) 0.080(5) -0.034(4) 0.017(4) -0.043(4) 
C59 0.076(5) 0.138(7) 0.127(7) -0.026(6) 0.041(5) -0.043(5) 
C60 0.066(5) 0.071(5) 0.142(7) 0.000(5) 0.009(5) -0.020(4) 
C61 0.095(6) 0.078(5) 0.113(6) -0.025(5) 0.006(5) -0.033(4) 
C62 0.077(4) 0.082(5) 0.085(5) -0.014(4) 0.017(4) -0.032(4) 
  
_geom_special_details 
; 
 All esds (except the esd in the dihedral angle between two l.s. planes) 
 are estimated using the full covariance matrix.  The cell esds are taken 
 into account individually in the estimation of esds in distances, angles 
 and torsion angles; correlations between esds in cell parameters are only 
 used when they are defined by crystal symmetry.  An approximate (isotropic) 
 treatment of cell esds is used for estimating esds involving l.s. planes. 
; 
  
loop_ 
 _geom_bond_atom_site_label_1 
 _geom_bond_atom_site_label_2 
 _geom_bond_distance 
 _geom_bond_site_symmetry_2 
 _geom_bond_publ_flag 
Se1 Mn3 2.3924(9) . ? 
Se1 Mn1 2.4265(9) . ? 
Se1 Mn2 2.4380(9) . ? 
Se1 Cr 2.5321(10) . ? 
Se2 Mn3 2.4246(9) . ? 
Se2 Mn2 2.4544(10) . ? 
Se2 Mn1 2.4681(9) . ? 
Cr C3 1.834(7) . ? 
Cr C1 1.870(7) . ? 
Cr C4 1.879(7) . ? 
Cr C5 1.880(7) . ? 
Cr C2 1.884(7) . ? 
Mn1 C7 1.772(6) . ? 
Mn1 C8 1.784(6) . ? 
Mn1 C9 1.787(6) . ? 
Mn1 Mn2 2.7608(11) . ? 
Mn2 C12 1.776(7) . ? 
Mn2 C13 1.790(6) . ? 
Mn2 C14 1.795(7) . ? 
Mn2 Mn3 2.7910(10) . ? 
Mn3 C6 1.771(6) . ? 
Mn3 C11 1.785(6) . ? 
Mn3 C10 1.788(6) . ? 
C1 O1 1.141(7) . ? 
C2 O2 1.132(7) . ? 
C3 O3 1.159(7) . ? 
C4 O4 1.144(6) . ? 
C5 O5 1.150(7) . ? 
C6 O6 1.150(6) . ? 
C7 O7 1.161(6) . ? 
C8 O8 1.155(6) . ? 
C9 O9 1.157(6) . ? 
C10 O10 1.160(6) . ? 
C11 O11 1.160(6) . ? 
C12 O12 1.169(7) . ? 
C13 O13 1.168(6) . ? 
C14 O14 1.156(7) . ? 
P1 C27 1.790(5) . ? 
P1 C21 1.796(5) . ? 
P1 C33 1.798(5) . ? 
P1 C15 1.801(5) . ? 
P2 C51 1.785(5) . ? 
P2 C57 1.797(5) . ? 
P2 C39 1.797(5) . ? 
P2 C45 1.797(5) . ? 
C15 C16 1.382(7) . ? 
C15 C20 1.394(7) . ? 
C16 C17 1.385(7) . ? 
C17 C18 1.367(8) . ? 
C18 C19 1.371(8) . ? 
C19 C20 1.371(7) . ? 
C21 C26 1.379(6) . ? 
C21 C22 1.380(6) . ? 
C22 C23 1.372(7) . ? 
C23 C24 1.380(7) . ? 
C24 C25 1.370(7) . ? 
C25 C26 1.382(7) . ? 
C27 C32 1.372(7) . ? 
C27 C28 1.385(7) . ? 
C28 C29 1.380(8) . ? 
C29 C30 1.362(8) . ? 
C30 C31 1.363(8) . ? 
C31 C32 1.382(7) . ? 
C33 C38 1.392(7) . ? 
C33 C34 1.396(7) . ? 
C34 C35 1.381(7) . ? 
C35 C36 1.381(8) . ? 
C36 C37 1.363(8) . ? 
C37 C38 1.375(7) . ? 
C39 C40 1.383(7) . ? 
C39 C44 1.391(7) . ? 
C40 C41 1.375(7) . ? 
C41 C42 1.369(8) . ? 
C42 C43 1.378(8) . ? 
C43 C44 1.370(7) . ? 
C45 C46 1.371(7) . ? 
C45 C50 1.382(7) . ? 
C46 C47 1.380(8) . ? 
C47 C48 1.347(8) . ? 
C48 C49 1.363(8) . ? 
C49 C50 1.378(8) . ? 
C51 C52 1.379(7) . ? 
C51 C56 1.390(7) . ? 
C52 C53 1.383(7) . ? 
C53 C54 1.364(8) . ? 
C54 C55 1.361(8) . ? 
C55 C56 1.384(7) . ? 
C57 C62 1.366(7) . ? 
C57 C58 1.372(7) . ? 
C58 C59 1.372(8) . ? 
C59 C60 1.354(9) . ? 
C60 C61 1.335(9) . ? 
C61 C62 1.393(8) . ? 
  
loop_ 
 _geom_angle_atom_site_label_1 
 _geom_angle_atom_site_label_2 
 _geom_angle_atom_site_label_3 
 _geom_angle 
 _geom_angle_site_symmetry_1 
 _geom_angle_site_symmetry_3 
 _geom_angle_publ_flag 
Mn3 Se1 Mn1 102.05(3) . . ? 
Mn3 Se1 Mn2 70.59(3) . . ? 
Mn1 Se1 Mn2 69.16(3) . . ? 
Mn3 Se1 Cr 127.92(3) . . ? 
Mn1 Se1 Cr 129.68(3) . . ? 
Mn2 Se1 Cr 128.17(4) . . ? 
Mn3 Se2 Mn2 69.78(3) . . ? 
Mn3 Se2 Mn1 99.94(3) . . ? 
Mn2 Se2 Mn1 68.23(3) . . ? 
C3 Cr C1 93.8(3) . . ? 
C3 Cr C4 94.7(3) . . ? 
C1 Cr C4 171.4(3) . . ? 
C3 Cr C5 88.8(3) . . ? 
C1 Cr C5 90.4(3) . . ? 
C4 Cr C5 90.3(3) . . ? 
C3 Cr C2 90.7(3) . . ? 
C1 Cr C2 88.7(3) . . ? 
C4 Cr C2 90.6(3) . . ? 
C5 Cr C2 178.9(3) . . ? 
C3 Cr Se1 177.3(3) . . ? 
C1 Cr Se1 85.38(18) . . ? 
C4 Cr Se1 86.04(18) . . ? 
C5 Cr Se1 93.8(2) . . ? 
C2 Cr Se1 86.67(19) . . ? 
C7 Mn1 C8 93.7(3) . . ? 
C7 Mn1 C9 94.6(2) . . ? 
C8 Mn1 C9 91.4(3) . . ? 
C7 Mn1 Se1 94.85(18) . . ? 
C8 Mn1 Se1 168.30(19) . . ? 
C9 Mn1 Se1 95.86(19) . . ? 
C7 Mn1 Se2 95.21(17) . . ? 
C8 Mn1 Se2 93.5(2) . . ? 
C9 Mn1 Se2 168.73(18) . . ? 
Se1 Mn1 Se2 77.83(3) . . ? 
C7 Mn1 Mn2 139.96(17) . . ? 
C8 Mn1 Mn2 112.98(19) . . ? 
C9 Mn1 Mn2 113.08(17) . . ? 
Se1 Mn1 Mn2 55.62(3) . . ? 
Se2 Mn1 Mn2 55.65(3) . . ? 
C12 Mn2 C13 89.8(3) . . ? 
C12 Mn2 C14 95.7(3) . . ? 
C13 Mn2 C14 90.1(2) . . ? 
C12 Mn2 Se1 163.9(2) . . ? 
C13 Mn2 Se1 104.15(17) . . ? 
C14 Mn2 Se1 92.3(2) . . ? 
C12 Mn2 Se2 91.2(2) . . ? 
C13 Mn2 Se2 104.04(17) . . ? 
C14 Mn2 Se2 164.32(18) . . ? 
Se1 Mn2 Se2 77.87(3) . . ? 
C12 Mn2 Mn1 108.9(2) . . ? 
C13 Mn2 Mn1 151.77(16) . . ? 
C14 Mn2 Mn1 108.23(18) . . ? 
Se1 Mn2 Mn1 55.22(3) . . ? 
Se2 Mn2 Mn1 56.12(3) . . ? 
C12 Mn2 Mn3 128.0(2) . . ? 
C13 Mn2 Mn3 66.89(16) . . ? 
C14 Mn2 Mn3 128.2(2) . . ? 
Se1 Mn2 Mn3 53.94(2) . . ? 
Se2 Mn2 Mn3 54.61(2) . . ? 
Mn1 Mn2 Mn3 84.88(3) . . ? 
C6 Mn3 C11 94.6(2) . . ? 
C6 Mn3 C10 92.8(3) . . ? 
C11 Mn3 C10 90.7(2) . . ? 
C6 Mn3 Se1 98.46(18) . . ? 
C11 Mn3 Se1 164.95(16) . . ? 
C10 Mn3 Se1 96.10(16) . . ? 
C6 Mn3 Se2 99.53(19) . . ? 
C11 Mn3 Se2 91.14(17) . . ? 
C10 Mn3 Se2 167.32(18) . . ? 
Se1 Mn3 Se2 79.33(3) . . ? 
C6 Mn3 Mn2 144.40(17) . . ? 
C11 Mn3 Mn2 109.50(16) . . ? 
C10 Mn3 Mn2 112.07(17) . . ? 
Se1 Mn3 Mn2 55.47(2) . . ? 
Se2 Mn3 Mn2 55.61(3) . . ? 
O1 C1 Cr 177.5(6) . . ? 
O2 C2 Cr 178.8(7) . . ? 
O3 C3 Cr 179.5(8) . . ? 
O4 C4 Cr 177.1(6) . . ? 
O5 C5 Cr 177.7(7) . . ? 
O6 C6 Mn3 177.7(6) . . ? 
O7 C7 Mn1 178.7(5) . . ? 
O8 C8 Mn1 178.4(6) . . ? 
O9 C9 Mn1 179.3(6) . . ? 
O10 C10 Mn3 177.4(5) . . ? 
O11 C11 Mn3 178.5(5) . . ? 
O12 C12 Mn2 178.5(7) . . ? 
O13 C13 Mn2 167.8(5) . . ? 
O14 C14 Mn2 179.3(6) . . ? 
C27 P1 C21 110.6(2) . . ? 
C27 P1 C33 107.2(2) . . ? 
C21 P1 C33 108.9(2) . . ? 
C27 P1 C15 109.1(2) . . ? 
C21 P1 C15 111.4(2) . . ? 
C33 P1 C15 109.5(2) . . ? 
C51 P2 C57 109.8(2) . . ? 
C51 P2 C39 110.7(2) . . ? 
C57 P2 C39 107.2(2) . . ? 
C51 P2 C45 107.9(2) . . ? 
C57 P2 C45 112.6(2) . . ? 
C39 P2 C45 108.7(2) . . ? 
C16 C15 C20 119.4(5) . . ? 
C16 C15 P1 120.7(4) . . ? 
C20 C15 P1 119.9(4) . . ? 
C15 C16 C17 119.6(5) . . ? 
C18 C17 C16 120.3(6) . . ? 
C17 C18 C19 120.4(6) . . ? 
C20 C19 C18 120.1(6) . . ? 
C19 C20 C15 120.1(5) . . ? 
C26 C21 C22 119.0(5) . . ? 
C26 C21 P1 119.8(4) . . ? 
C22 C21 P1 121.2(4) . . ? 
C23 C22 C21 119.8(5) . . ? 
C22 C23 C24 120.9(5) . . ? 
C25 C24 C23 119.7(5) . . ? 
C24 C25 C26 119.3(5) . . ? 
C21 C26 C25 121.1(5) . . ? 
C32 C27 C28 119.4(5) . . ? 
C32 C27 P1 120.9(4) . . ? 
C28 C27 P1 119.4(4) . . ? 
C29 C28 C27 119.7(6) . . ? 
C30 C29 C28 120.5(6) . . ? 
C29 C30 C31 119.9(6) . . ? 
C30 C31 C32 120.4(6) . . ? 
C27 C32 C31 120.0(5) . . ? 
C38 C33 C34 119.1(5) . . ? 
C38 C33 P1 121.0(4) . . ? 
C34 C33 P1 119.9(4) . . ? 
C35 C34 C33 119.8(5) . . ? 
C34 C35 C36 120.3(6) . . ? 
C37 C36 C35 119.9(6) . . ? 
C36 C37 C38 121.0(6) . . ? 
C37 C38 C33 119.9(5) . . ? 
C40 C39 C44 119.1(5) . . ? 
C40 C39 P2 120.8(4) . . ? 
C44 C39 P2 120.1(4) . . ? 
C41 C40 C39 119.5(6) . . ? 
C42 C41 C40 121.2(6) . . ? 
C41 C42 C43 119.7(6) . . ? 
C44 C43 C42 119.8(6) . . ? 
C43 C44 C39 120.7(6) . . ? 
C46 C45 C50 118.4(5) . . ? 
C46 C45 P2 121.8(4) . . ? 
C50 C45 P2 119.7(4) . . ? 
C45 C46 C47 120.6(6) . . ? 
C48 C47 C46 120.5(6) . . ? 
C47 C48 C49 119.9(6) . . ? 
C48 C49 C50 120.4(6) . . ? 
C49 C50 C45 120.2(6) . . ? 
C52 C51 C56 119.1(5) . . ? 
C52 C51 P2 120.5(4) . . ? 
C56 C51 P2 120.3(4) . . ? 
C51 C52 C53 120.3(5) . . ? 
C54 C53 C52 120.0(6) . . ? 
C55 C54 C53 120.6(6) . . ? 
C54 C55 C56 120.2(6) . . ? 
C55 C56 C51 119.8(5) . . ? 
C62 C57 C58 118.1(5) . . ? 
C62 C57 P2 121.9(4) . . ? 
C58 C57 P2 120.0(4) . . ? 
C57 C58 C59 120.6(6) . . ? 
C60 C59 C58 121.0(7) . . ? 
C61 C60 C59 119.1(7) . . ? 
C60 C61 C62 121.1(7) . . ? 
C57 C62 C61 120.1(6) . . ? 
  
_diffrn_measured_fraction_theta_max    1.000 
_diffrn_reflns_theta_full              25.00 
_diffrn_measured_fraction_theta_full   1.000 
_refine_diff_density_max    0.369 
_refine_diff_density_min   -0.386 
_refine_diff_density_rms    0.076 

#=============================================END

data_2a
 
_audit_creation_method            SHELXL-97
_chemical_name_systematic
;
 ?
;
_chemical_name_common             ?
_chemical_melting_point           ?
_chemical_formula_moiety          'C43 H44 Cl2 Cr Mn3 N3 O12 S2'
_chemical_formula_sum             'C43 H44 Cl2 Cr Mn3 N3 O12 S2'
_chemical_formula_weight          1146.65
 
loop_
 _atom_type_symbol
 _atom_type_description
 _atom_type_scat_dispersion_real
 _atom_type_scat_dispersion_imag
 _atom_type_scat_source
 'C'  'C'   0.0033   0.0016
 'International Tables Vol C Tables 4.2.6.8 and 6.1.1.4'
 'H'  'H'   0.0000   0.0000
 'International Tables Vol C Tables 4.2.6.8 and 6.1.1.4'
 'N'  'N'   0.0061   0.0033
 'International Tables Vol C Tables 4.2.6.8 and 6.1.1.4'
 'O'  'O'   0.0106   0.0060
 'International Tables Vol C Tables 4.2.6.8 and 6.1.1.4'
 'Cr'  'Cr'   0.3209   0.6236
 'International Tables Vol C Tables 4.2.6.8 and 6.1.1.4'
 'Mn'  'Mn'   0.3368   0.7283
 'International Tables Vol C Tables 4.2.6.8 and 6.1.1.4'
 'S'  'S'   0.1246   0.1234
 'International Tables Vol C Tables 4.2.6.8 and 6.1.1.4'
 'Cl'  'Cl'   0.1484   0.1585
 'International Tables Vol C Tables 4.2.6.8 and 6.1.1.4'
 
_symmetry_cell_setting            triclinic
_symmetry_space_group_name_H-M    'P -1'
 
loop_
 _symmetry_equiv_pos_as_xyz
 'x, y, z'
 '-x, -y, -z'
 
_cell_length_a                    12.2105(4)
_cell_length_b                    13.2732(4)
_cell_length_c                    16.8203(6)
_cell_angle_alpha                 68.679(2)
_cell_angle_beta                  85.157(2)
_cell_angle_gamma                 88.3120(10)
_cell_volume                      2530.46(14)
_cell_formula_units_Z             2
_cell_measurement_temperature     200(2)
_cell_measurement_reflns_used     0
_cell_measurement_theta_min       0
_cell_measurement_theta_max       0
 
_exptl_crystal_description        prism
_exptl_crystal_colour             black
_exptl_crystal_size_max           0.34
_exptl_crystal_size_mid           0.14
_exptl_crystal_size_min           0.04
_exptl_crystal_density_meas       ?
_exptl_crystal_density_diffrn     1.505
_exptl_crystal_density_method     'not measured'
_exptl_crystal_F_000              1168
_exptl_absorpt_coefficient_mu     1.188
_exptl_absorpt_correction_type    multi-scan
_exptl_absorpt_correction_T_min   0.6882
_exptl_absorpt_correction_T_max   0.9540
_exptl_absorpt_process_details    ?
 
_exptl_special_details
;
 ?
;
 
_diffrn_ambient_temperature       200(2)
_diffrn_radiation_wavelength      0.71073
_diffrn_radiation_type            MoK\a
_diffrn_radiation_source          'fine-focus sealed tube'
_diffrn_radiation_monochromator   graphite
_diffrn_measurement_device_type   ?
_diffrn_measurement_method        ?
_diffrn_detector_area_resol_mean  ?
_diffrn_standards_number          ?
_diffrn_standards_interval_count  ?
_diffrn_standards_interval_time   ?
_diffrn_standards_decay_%         ?
_diffrn_reflns_number             19741
_diffrn_reflns_av_R_equivalents   0.1659
_diffrn_reflns_av_sigmaI/netI     0.1633
_diffrn_reflns_limit_h_min        -14
_diffrn_reflns_limit_h_max        14
_diffrn_reflns_limit_k_min        -14
_diffrn_reflns_limit_k_max        15
_diffrn_reflns_limit_l_min        -19
_diffrn_reflns_limit_l_max        16
_diffrn_reflns_theta_min          1.65
_diffrn_reflns_theta_max          25.02
_reflns_number_total              8771
_reflns_number_gt                 4983
_reflns_threshold_expression      >2sigma(I)
 
_computing_data_collection        ?
_computing_cell_refinement        ?
_computing_data_reduction         ?
_computing_structure_solution     'SHELXS-86 (Sheldrick, 1986)'
_computing_structure_refinement   'SHELXL-97 (Sheldrick, 1997)'
_computing_molecular_graphics     'Ortep-3 for Windows (Farrugia, 1997)'
_computing_publication_material   'WinGX publication routines (Farrugia, 1999)'
 
_refine_special_details
;
 Refinement of F^2^ against ALL reflections.  The weighted R-factor wR and
 goodness of fit S are based on F^2^, conventional R-factors R are based
 on F, with F set to zero for negative F^2^. The threshold expression of
 F^2^ > 2sigma(F^2^) is used only for calculating R-factors(gt) etc. and is
 not relevant to the choice of reflections for refinement.  R-factors based
 on F^2^ are statistically about twice as large as those based on F, and R-
 factors based on ALL data will be even larger.
;
 
_refine_ls_structure_factor_coef  Fsqd
_refine_ls_matrix_type            full
_refine_ls_weighting_scheme       calc
_refine_ls_weighting_details
 'calc w=1/[\s^2^(Fo^2^)+(0.1032P)^2^+0.0000P] where P=(Fo^2^+2Fc^2^)/3'
_atom_sites_solution_primary      direct
_atom_sites_solution_secondary    difmap
_atom_sites_solution_hydrogens    geom
_refine_ls_hydrogen_treatment     fixed
_refine_ls_extinction_method      none
_refine_ls_extinction_coef        ?
_refine_ls_number_reflns          8771
_refine_ls_number_parameters      607
_refine_ls_number_restraints      0
_refine_ls_R_factor_all           0.1198
_refine_ls_R_factor_gt            0.0666
_refine_ls_wR_factor_ref          0.1922
_refine_ls_wR_factor_gt           0.1562
_refine_ls_goodness_of_fit_ref    0.864
_refine_ls_restrained_S_all       0.864
_refine_ls_shift/su_max           0.021
_refine_ls_shift/su_mean          0.210
 
loop_
 _atom_site_label
 _atom_site_type_symbol
 _atom_site_fract_x
 _atom_site_fract_y
 _atom_site_fract_z
 _atom_site_U_iso_or_equiv
 _atom_site_adp_type
 _atom_site_occupancy
 _atom_site_symmetry_multiplicity
 _atom_site_calc_flag
 _atom_site_refinement_flags
 _atom_site_disorder_assembly
 _atom_site_disorder_group
C1 C 0.8992(5) 0.3331(6) 0.4163(5) 0.0336(17) Uani 1 1 d . . .
C2 C 0.8294(5) 0.2872(6) 0.5737(4) 0.0311(17) Uani 1 1 d . . .
C3 C 0.7732(6) 0.4644(6) 0.4606(4) 0.042(2) Uani 1 1 d . . .
C4 C 0.8168(5) 0.6813(5) 0.3820(4) 0.0308(17) Uani 1 1 d . . .
C5 C 0.7721(5) 0.6242(5) 0.5375(4) 0.0333(17) Uani 1 1 d . . .
C6 C 0.9429(6) 0.7319(6) 0.4676(4) 0.0373(18) Uani 1 1 d . . .
C7 C 0.6609(5) 0.3981(5) 0.1627(4) 0.0284(16) Uani 1 1 d . . .
C8 C 0.6482(5) 0.2775(6) 0.0706(4) 0.0340(18) Uani 1 1 d . . .
C9 C 0.4771(6) 0.3125(6) 0.1634(5) 0.0392(19) Uani 1 1 d . . .
C10 C 0.2934(6) 0.3197(6) 0.0759(4) 0.0356(18) Uani 1 1 d . . .
C11 C 0.2603(7) 0.5273(6) 0.0010(4) 0.0377(18) Uani 1 1 d . . .
C12 C 0.3011(5) 0.4411(5) 0.1606(4) 0.0292(17) Uani 1 1 d . . .
C13 C -0.0169(6) 0.4764(6) 0.1675(5) 0.045(2) Uani 1 1 d . . .
H13A H -0.0859 0.4451 0.1612 0.067 Uiso 1 1 calc R . .
H13B H 0.0048 0.4401 0.2259 0.067 Uiso 1 1 calc R . .
H13C H 0.0406 0.4667 0.1266 0.067 Uiso 1 1 calc R . .
C14 C -0.0663(7) 0.6495(6) 0.0605(4) 0.050(2) Uani 1 1 d . . .
H14A H -0.1367 0.6195 0.0554 0.075 Uiso 1 1 calc R . .
H14B H -0.0101 0.6366 0.0201 0.075 Uiso 1 1 calc R . .
H14C H -0.0741 0.7274 0.0474 0.075 Uiso 1 1 calc R . .
C15 C -0.1212(5) 0.6100(7) 0.2120(5) 0.045(2) Uani 1 1 d . . .
H15A H -0.1905 0.5809 0.2040 0.067 Uiso 1 1 calc R . .
H15B H -0.1300 0.6872 0.2022 0.067 Uiso 1 1 calc R . .
H15C H -0.1011 0.5714 0.2706 0.067 Uiso 1 1 calc R . .
C16 C 0.0775(5) 0.6382(6) 0.1609(4) 0.0355(18) Uani 1 1 d . . .
C17 C 0.0775(5) 0.7581(6) 0.1449(4) 0.0296(16) Uani 1 1 d . . .
C18 C 0.1102(6) 0.8317(7) 0.0635(5) 0.050(2) Uani 1 1 d . . .
H18 H 0.1276 0.8069 0.0176 0.060 Uiso 1 1 calc R . .
C19 C 0.1170(7) 0.9399(7) 0.0496(6) 0.062(3) Uani 1 1 d . . .
H19 H 0.1395 0.9897 -0.0059 0.075 Uiso 1 1 calc R . .
C20 C 0.0920(7) 0.9763(7) 0.1147(7) 0.067(3) Uani 1 1 d . . .
H20 H 0.0965 1.0514 0.1043 0.080 Uiso 1 1 calc R . .
C21 C 0.0604(7) 0.9052(7) 0.1950(6) 0.060(2) Uani 1 1 d . . .
H21 H 0.0433 0.9311 0.2403 0.072 Uiso 1 1 calc R . .
C22 C 0.0531(6) 0.7957(7) 0.2105(5) 0.047(2) Uani 1 1 d . . .
H22 H 0.0312 0.7466 0.2665 0.057 Uiso 1 1 calc R . .
C23 C 0.4696(6) 0.6590(6) 0.3567(4) 0.043(2) Uani 1 1 d . . .
H23A H 0.5461 0.6511 0.3716 0.065 Uiso 1 1 calc R . .
H23B H 0.4234 0.6071 0.4032 0.065 Uiso 1 1 calc R . .
H23C H 0.4444 0.7327 0.3484 0.065 Uiso 1 1 calc R . .
C24 C 0.5001(6) 0.5236(6) 0.2908(5) 0.048(2) Uani 1 1 d . . .
H24A H 0.5764 0.5157 0.3061 0.073 Uiso 1 1 calc R . .
H24B H 0.4954 0.5082 0.2384 0.073 Uiso 1 1 calc R . .
H24C H 0.4533 0.4727 0.3375 0.073 Uiso 1 1 calc R . .
C25 C 0.3449(6) 0.6479(6) 0.2537(5) 0.048(2) Uani 1 1 d . . .
H25A H 0.3402 0.6340 0.2007 0.072 Uiso 1 1 calc R . .
H25B H 0.3184 0.7211 0.2456 0.072 Uiso 1 1 calc R . .
H25C H 0.2995 0.5952 0.3002 0.072 Uiso 1 1 calc R . .
C26 C 0.5385(6) 0.7118(6) 0.2026(4) 0.0380(18) Uani 1 1 d . . .
C27 C 0.5057(6) 0.8287(6) 0.1752(4) 0.0344(18) Uani 1 1 d . . .
C28 C 0.4328(7) 0.8733(8) 0.1114(5) 0.063(3) Uani 1 1 d . . .
H28 H 0.4012 0.8291 0.0858 0.076 Uiso 1 1 calc R . .
C29 C 0.4067(8) 0.9842(9) 0.0855(6) 0.077(3) Uani 1 1 d . . .
H29 H 0.3567 1.0147 0.0427 0.092 Uiso 1 1 calc R . .
C30 C 0.4530(8) 1.0481(8) 0.1216(6) 0.065(3) Uani 1 1 d . . .
H30 H 0.4336 1.1224 0.1045 0.078 Uiso 1 1 calc R . .
C31 C 0.5260(8) 1.0068(7) 0.1814(5) 0.059(2) Uani 1 1 d . . .
H31 H 0.5595 1.0521 0.2051 0.071 Uiso 1 1 calc R . .
C32 C 0.5514(6) 0.8974(6) 0.2079(5) 0.045(2) Uani 1 1 d . . .
H32 H 0.6023 0.8689 0.2503 0.053 Uiso 1 1 calc R . .
C33 C 0.1151(6) 1.0191(6) 0.4075(5) 0.045(2) Uani 1 1 d . . .
H33A H 0.0848 1.0385 0.4559 0.067 Uiso 1 1 calc R . .
H33B H 0.1400 0.9438 0.4287 0.067 Uiso 1 1 calc R . .
H33C H 0.0583 1.0276 0.3678 0.067 Uiso 1 1 calc R . .
C34 C 0.2545(6) 1.0598(6) 0.2890(4) 0.043(2) Uani 1 1 d . . .
H34A H 0.3170 1.1068 0.2589 0.065 Uiso 1 1 calc R . .
H34B H 0.1974 1.0683 0.2494 0.065 Uiso 1 1 calc R . .
H34C H 0.2789 0.9843 0.3104 0.065 Uiso 1 1 calc R . .
C35 C 0.1694(7) 1.2054(6) 0.3291(5) 0.054(2) Uani 1 1 d . . .
H35A H 0.2313 1.2533 0.2991 0.081 Uiso 1 1 calc R . .
H35B H 0.1382 1.2256 0.3768 0.081 Uiso 1 1 calc R . .
H35C H 0.1130 1.2124 0.2893 0.081 Uiso 1 1 calc R . .
C36 C 0.2985(6) 1.0870(6) 0.4229(4) 0.0400(19) Uani 1 1 d . . .
C37 C 0.3562(6) 0.9779(6) 0.4543(4) 0.0378(18) Uani 1 1 d . . .
C38 C 0.4569(6) 0.9660(7) 0.4140(5) 0.0425(19) Uani 1 1 d . . .
H38 H 0.4873 1.0241 0.3657 0.051 Uiso 1 1 calc R . .
C39 C 0.5142(7) 0.8665(7) 0.4453(6) 0.055(2) Uani 1 1 d . . .
H39 H 0.5831 0.8577 0.4178 0.066 Uiso 1 1 calc R . .
C40 C 0.4708(8) 0.7843(7) 0.5140(6) 0.065(3) Uani 1 1 d . . .
H40 H 0.5094 0.7178 0.5345 0.078 Uiso 1 1 calc R . .
C41 C 0.3721(8) 0.7954(7) 0.5546(6) 0.063(3) Uani 1 1 d . . .
H41 H 0.3427 0.7370 0.6030 0.076 Uiso 1 1 calc R . .
C42 C 0.3146(7) 0.8924(6) 0.5251(5) 0.051(2) Uani 1 1 d . . .
H42 H 0.2462 0.8999 0.5537 0.062 Uiso 1 1 calc R . .
C43 C 0.8206(9) 0.1511(8) 0.2441(6) 0.085(3) Uani 1 1 d . . .
H43A H 0.8081 0.1918 0.2831 0.102 Uiso 1 1 calc R . .
H43B H 0.7583 0.1664 0.2074 0.102 Uiso 1 1 calc R . .
N1 N -0.0328(4) 0.5957(4) 0.1500(3) 0.0320(14) Uani 1 1 d . . .
N2 N 0.4619(4) 0.6378(4) 0.2759(3) 0.0320(14) Uani 1 1 d . . .
N3 N 0.2088(4) 1.0904(4) 0.3628(3) 0.0339(14) Uani 1 1 d . . .
O1 O 0.8972(4) 0.2879(4) 0.3686(3) 0.0539(15) Uani 1 1 d . . .
O2 O 0.7806(4) 0.2159(4) 0.6239(3) 0.0448(14) Uani 1 1 d . . .
O3 O 0.6819(4) 0.4758(4) 0.4422(3) 0.0495(14) Uani 1 1 d . . .
O4 O 0.7636(4) 0.7334(4) 0.3257(3) 0.0484(14) Uani 1 1 d . . .
O5 O 0.6965(4) 0.6405(4) 0.5778(3) 0.0518(15) Uani 1 1 d . . .
O6 O 0.9475(4) 0.8252(4) 0.4601(3) 0.0468(14) Uani 1 1 d . . .
O7 O 0.7087(4) 0.3966(4) 0.2199(3) 0.0466(14) Uani 1 1 d . . .
O8 O 0.6892(4) 0.2001(4) 0.0655(3) 0.0532(15) Uani 1 1 d . . .
O9 O 0.4573(4) 0.2423(4) 0.2283(3) 0.0488(14) Uani 1 1 d . . .
O10 O 0.2359(4) 0.2478(4) 0.0830(3) 0.0554(15) Uani 1 1 d . . .
O11 O 0.1676(4) 0.5472(5) -0.0060(3) 0.0506(15) Uani 1 1 d . . .
O12 O 0.2504(4) 0.4443(4) 0.2214(3) 0.0412(13) Uani 1 1 d . . .
Mn1 Mn 0.9007(13) 0.3973(15) 0.4906(10) 0.0252(13) Uani 0.75 1 d P . 1
Mn2 Mn 0.8868(15) 0.6086(11) 0.4705(11) 0.0255(12) Uani 0.75 1 d P . 1
Cr1 Cr 0.911(4) 0.397(5) 0.499(3) 0.0252(13) Uani 0.25 1 d P . 2
Cr2 Cr 0.892(5) 0.597(4) 0.480(4) 0.0255(12) Uani 0.25 1 d P . 2
Mn3 Mn 0.57970(13) 0.39495(17) 0.07976(13) 0.0307(5) Uani 0.75 1 d P . 3
Mn4 Mn 0.3696(3) 0.4381(3) 0.0639(2) 0.0331(6) Uani 0.75 1 d P . 3
Cr3 Cr 0.6131(5) 0.4149(7) 0.0611(5) 0.0307(5) Uani 0.25 1 d P . 4
Cr4 Cr 0.3908(11) 0.4150(11) 0.0789(9) 0.0331(6) Uani 0.25 1 d P . 4
S1 S 1.03553(13) 0.53036(13) 0.40817(10) 0.0277(4) Uani 1 1 d . . .
S2 S 0.50471(15) 0.57171(14) 0.04983(11) 0.0329(5) Uani 1 1 d . . .
Cl1 Cl 0.9448(3) 0.1976(2) 0.17814(17) 0.0986(10) Uani 1 1 d . . .
Cl2 Cl 0.8227(3) 0.0171(2) 0.3031(2) 0.1178(12) Uani 1 1 d . . .
 
loop_
 _atom_site_aniso_label
 _atom_site_aniso_U_11
 _atom_site_aniso_U_22
 _atom_site_aniso_U_33
 _atom_site_aniso_U_23
 _atom_site_aniso_U_13
 _atom_site_aniso_U_12
C1 0.026(4) 0.040(4) 0.034(4) -0.012(4) 0.000(3) 0.001(3)
C2 0.027(4) 0.038(4) 0.032(4) -0.017(3) -0.006(3) 0.017(3)
C3 0.036(5) 0.054(5) 0.031(4) -0.010(4) -0.006(3) 0.014(4)
C4 0.020(4) 0.036(4) 0.036(4) -0.015(3) 0.003(3) 0.003(3)
C5 0.023(4) 0.035(4) 0.034(4) -0.003(3) 0.000(3) -0.004(3)
C6 0.041(4) 0.042(5) 0.031(4) -0.018(4) 0.008(3) -0.007(4)
C7 0.021(4) 0.036(4) 0.026(4) -0.009(3) 0.008(3) 0.001(3)
C8 0.025(4) 0.043(5) 0.033(4) -0.013(3) 0.006(3) -0.001(3)
C9 0.038(4) 0.035(4) 0.050(5) -0.024(4) 0.004(4) 0.003(4)
C10 0.028(4) 0.037(4) 0.038(4) -0.008(3) -0.006(3) -0.001(4)
C11 0.050(5) 0.038(4) 0.027(4) -0.015(3) 0.000(4) 0.003(4)
C12 0.019(4) 0.028(4) 0.034(4) -0.002(3) -0.005(3) -0.003(3)
C13 0.039(4) 0.049(5) 0.049(5) -0.021(4) -0.004(4) 0.011(4)
C14 0.051(5) 0.058(5) 0.043(5) -0.018(4) -0.024(4) 0.005(4)
C15 0.028(4) 0.068(6) 0.049(5) -0.035(4) -0.002(4) 0.006(4)
C16 0.026(4) 0.042(4) 0.044(4) -0.020(4) -0.009(3) 0.002(3)
C17 0.021(4) 0.040(4) 0.033(4) -0.020(3) -0.004(3) 0.007(3)
C18 0.036(4) 0.063(6) 0.051(5) -0.022(5) 0.002(4) -0.006(4)
C19 0.065(6) 0.056(6) 0.057(6) -0.010(5) -0.008(5) -0.017(5)
C20 0.065(6) 0.049(6) 0.087(8) -0.022(6) -0.016(6) -0.001(5)
C21 0.058(6) 0.065(6) 0.074(7) -0.047(6) -0.001(5) 0.004(5)
C22 0.048(5) 0.050(5) 0.046(5) -0.019(4) -0.004(4) -0.002(4)
C23 0.047(5) 0.050(5) 0.038(4) -0.023(4) 0.005(4) 0.001(4)
C24 0.047(5) 0.041(5) 0.059(5) -0.021(4) -0.002(4) 0.009(4)
C25 0.029(4) 0.052(5) 0.068(6) -0.027(4) -0.011(4) 0.003(4)
C26 0.038(4) 0.038(4) 0.036(4) -0.015(3) 0.011(3) 0.001(3)
C27 0.030(4) 0.049(5) 0.031(4) -0.023(4) 0.000(3) -0.003(4)
C28 0.057(6) 0.068(7) 0.052(5) -0.006(5) -0.015(5) -0.011(5)
C29 0.049(6) 0.080(8) 0.066(7) 0.018(6) -0.014(5) 0.003(6)
C30 0.055(6) 0.048(6) 0.078(7) -0.011(5) 0.010(5) 0.011(5)
C31 0.074(7) 0.039(5) 0.060(6) -0.017(4) 0.011(5) -0.001(5)
C32 0.046(5) 0.046(5) 0.039(5) -0.014(4) 0.004(4) -0.001(4)
C33 0.034(4) 0.047(5) 0.051(5) -0.017(4) 0.009(4) -0.011(4)
C34 0.040(4) 0.050(5) 0.039(4) -0.015(4) 0.001(4) -0.005(4)
C35 0.060(5) 0.031(4) 0.065(6) -0.011(4) -0.004(4) 0.002(4)
C36 0.043(5) 0.043(5) 0.038(4) -0.017(4) -0.014(4) 0.000(4)
C37 0.043(5) 0.041(5) 0.034(4) -0.018(4) -0.005(4) -0.001(4)
C38 0.041(5) 0.057(5) 0.038(4) -0.025(4) -0.007(4) -0.003(4)
C39 0.043(5) 0.076(7) 0.064(6) -0.044(6) -0.016(5) 0.010(5)
C40 0.064(7) 0.055(6) 0.080(7) -0.022(5) -0.041(6) 0.017(5)
C41 0.064(6) 0.051(6) 0.061(6) -0.002(5) -0.014(5) 0.003(5)
C42 0.053(5) 0.052(5) 0.043(5) -0.009(4) -0.008(4) 0.001(4)
C43 0.100(8) 0.092(8) 0.067(7) -0.030(6) -0.032(6) 0.031(7)
N1 0.025(3) 0.041(4) 0.036(3) -0.020(3) -0.004(3) 0.005(3)
N2 0.028(3) 0.032(3) 0.040(3) -0.019(3) 0.000(3) 0.001(3)
N3 0.033(3) 0.032(3) 0.037(3) -0.014(3) 0.004(3) -0.002(3)
O1 0.057(4) 0.065(4) 0.053(4) -0.038(3) -0.003(3) -0.005(3)
O2 0.041(3) 0.034(3) 0.050(3) -0.007(3) 0.012(3) -0.009(2)
O3 0.031(3) 0.047(3) 0.070(4) -0.018(3) -0.015(3) 0.007(3)
O4 0.039(3) 0.059(3) 0.042(3) -0.010(3) -0.016(3) 0.020(3)
O5 0.026(3) 0.068(4) 0.060(4) -0.026(3) 0.014(3) 0.006(3)
O6 0.040(3) 0.039(3) 0.061(4) -0.019(3) 0.000(3) 0.000(3)
O7 0.035(3) 0.071(4) 0.039(3) -0.024(3) -0.010(3) 0.006(3)
O8 0.048(3) 0.050(3) 0.067(4) -0.030(3) 0.005(3) 0.018(3)
O9 0.054(3) 0.037(3) 0.046(3) -0.004(3) 0.000(3) -0.001(3)
O10 0.052(4) 0.042(3) 0.068(4) -0.009(3) -0.024(3) -0.007(3)
O11 0.030(3) 0.075(4) 0.053(3) -0.032(3) 0.001(3) 0.003(3)
O12 0.040(3) 0.045(3) 0.035(3) -0.014(2) 0.011(3) 0.004(2)
Mn1 0.022(3) 0.0303(7) 0.024(3) -0.0104(17) -0.0012(17) -0.001(2)
Mn2 0.0191(16) 0.029(4) 0.024(3) -0.006(2) -0.0018(16) 0.008(2)
Cr1 0.022(3) 0.0303(7) 0.024(3) -0.0104(17) -0.0012(17) -0.001(2)
Cr2 0.0191(16) 0.029(4) 0.024(3) -0.006(2) -0.0018(16) 0.008(2)
Mn3 0.0228(12) 0.0406(13) 0.0322(13) -0.0170(10) -0.0054(8) 0.0062(9)
Mn4 0.0324(17) 0.0373(19) 0.0311(17) -0.0158(13) 0.0061(11) -0.0045(11)
Cr3 0.0228(12) 0.0406(13) 0.0322(13) -0.0170(10) -0.0054(8) 0.0062(9)
Cr4 0.0324(17) 0.0373(19) 0.0311(17) -0.0158(13) 0.0061(11) -0.0045(11)
S1 0.0253(9) 0.0329(10) 0.0237(9) -0.0098(7) 0.0021(7) 0.0022(8)
S2 0.0377(10) 0.0356(10) 0.0306(10) -0.0183(8) -0.0037(8) 0.0020(8)
Cl1 0.146(3) 0.0754(19) 0.0747(18) -0.0275(15) -0.0148(19) 0.0129(19)
Cl2 0.125(3) 0.075(2) 0.138(3) -0.0285(19) 0.023(2) 0.0208(19)
 
_geom_special_details
;
 All esds (except the esd in the dihedral angle between two l.s. planes)
 are estimated using the full covariance matrix.  The cell esds are taken
 into account individually in the estimation of esds in distances, angles
 and torsion angles; correlations between esds in cell parameters are only
 used when they are defined by crystal symmetry.  An approximate (isotropic)
 treatment of cell esds is used for estimating esds involving l.s. planes.
;
 
loop_
 _geom_bond_atom_site_label_1
 _geom_bond_atom_site_label_2
 _geom_bond_distance
 _geom_bond_site_symmetry_2
 _geom_bond_publ_flag
C1 O1 1.165(8) . ?
C1 Cr1 1.89(6) . ?
C1 Mn1 1.752(19) . ?
C2 O2 1.153(8) . ?
C2 Cr1 1.80(6) . ?
C2 Mn1 1.80(2) . ?
C3 O3 1.173(8) . ?
C3 Mn1 1.788(17) . ?
C3 Cr1 1.92(5) . ?
C3 Cr2 2.45(7) . ?
C3 Mn2 2.46(2) . ?
C4 O4 1.183(7) . ?
C4 Mn2 1.732(17) . ?
C4 Cr2 1.92(5) . ?
C5 O5 1.161(7) . ?
C5 Mn2 1.78(2) . ?
C5 Cr2 1.79(6) . ?
C6 O6 1.201(8) . ?
C6 Mn2 1.78(2) . ?
C6 Cr2 1.84(6) . ?
C6 Cr1 2.39(6) 2_766 ?
C6 Mn1 2.497(18) 2_766 ?
C7 O7 1.160(7) . ?
C7 Mn3 1.791(8) . ?
C7 Cr3 1.787(11) . ?
C8 O8 1.158(7) . ?
C8 Cr3 1.813(11) . ?
C8 Mn3 1.797(8) . ?
C9 O9 1.161(8) . ?
C9 Cr3 2.348(10) . ?
C9 Mn3 1.847(8) . ?
C9 Mn4 2.349(8) . ?
C10 O10 1.166(8) . ?
C10 Mn4 1.790(9) . ?
C10 Cr4 1.778(19) . ?
C11 O11 1.161(8) . ?
C11 Cr4 2.296(12) . ?
C11 Mn4 1.881(8) . ?
C11 Mn3 2.318(8) 2_665 ?
C12 O12 1.162(7) . ?
C12 Mn4 1.779(8) . ?
C12 Cr4 1.812(18) . ?
C13 N1 1.511(9) . ?
C13 H13A 0.9800 . ?
C13 H13B 0.9800 . ?
C13 H13C 0.9800 . ?
C14 N1 1.500(8) . ?
C14 H14A 0.9800 . ?
C14 H14B 0.9800 . ?
C14 H14C 0.9800 . ?
C15 N1 1.494(8) . ?
C15 H15A 0.9800 . ?
C15 H15B 0.9800 . ?
C15 H15C 0.9800 . ?
C16 C17 1.515(10) . ?
C16 N1 1.525(8) . ?
C17 C22 1.376(10) . ?
C17 C18 1.396(10) . ?
C18 C19 1.372(11) . ?
C18 H18 0.9500 . ?
C19 C20 1.357(12) . ?
C19 H19 0.9500 . ?
C20 C21 1.368(12) . ?
C20 H20 0.9500 . ?
C21 C22 1.384(11) . ?
C21 H21 0.9500 . ?
C22 H22 0.9500 . ?
C23 N2 1.495(8) . ?
C23 H23A 0.9800 . ?
C23 H23B 0.9800 . ?
C23 H23C 0.9800 . ?
C24 N2 1.511(8) . ?
C24 H24A 0.9800 . ?
C24 H24B 0.9800 . ?
C24 H24C 0.9800 . ?
C25 N2 1.497(8) . ?
C25 H25A 0.9800 . ?
C25 H25B 0.9800 . ?
C25 H25C 0.9800 . ?
C26 C27 1.502(10) . ?
C26 N2 1.530(8) . ?
C27 C32 1.375(10) . ?
C27 C28 1.401(10) . ?
C28 C29 1.410(13) . ?
C28 H28 0.9500 . ?
C29 C30 1.367(13) . ?
C29 H29 0.9500 . ?
C30 C31 1.353(12) . ?
C30 H30 0.9500 . ?
C31 C32 1.390(10) . ?
C31 H31 0.9500 . ?
C32 H32 0.9500 . ?
C33 N3 1.473(8) . ?
C33 H33A 0.9800 . ?
C33 H33B 0.9800 . ?
C33 H33C 0.9800 . ?
C34 N3 1.502(9) . ?
C34 H34A 0.9800 . ?
C34 H34B 0.9800 . ?
C34 H34C 0.9800 . ?
C35 N3 1.502(8) . ?
C35 H35A 0.9800 . ?
C35 H35B 0.9800 . ?
C35 H35C 0.9800 . ?
C36 C37 1.523(9) . ?
C36 N3 1.542(9) . ?
C37 C42 1.383(10) . ?
C37 C38 1.386(10) . ?
C38 C39 1.419(10) . ?
C38 H38 0.9500 . ?
C39 C40 1.350(12) . ?
C39 H39 0.9500 . ?
C40 C41 1.365(12) . ?
C40 H40 0.9500 . ?
C41 C42 1.392(11) . ?
C41 H41 0.9500 . ?
C42 H42 0.9500 . ?
C43 Cl2 1.693(10) . ?
C43 Cl1 1.785(11) . ?
C43 H43A 0.9900 . ?
C43 H43B 0.9900 . ?
Mn1 S1 2.400(18) . ?
Mn1 S1 2.426(15) 2_766 ?
Mn1 C6 2.497(18) 2_766 ?
Mn1 Mn2 2.72(2) 2_766 ?
Mn1 Mn2 2.70(2) . ?
Mn2 S1 2.439(13) 2_766 ?
Mn2 S1 2.416(18) . ?
Mn2 Mn1 2.72(2) 2_766 ?
Cr1 C6 2.39(6) 2_766 ?
Cr1 S1 2.26(5) 2_766 ?
Cr1 S1 2.36(6) . ?
Cr1 Cr2 2.57(8) . ?
Cr1 Cr2 2.47(8) 2_766 ?
Cr2 S1 2.38(6) . ?
Cr2 S1 2.25(4) 2_766 ?
Cr2 Cr1 2.47(8) 2_766 ?
Mn3 C11 2.318(8) 2_665 ?
Mn3 S2 2.385(3) . ?
Mn3 S2 2.379(3) 2_665 ?
Mn3 Mn4 2.626(3) . ?
Mn3 Mn4 2.658(4) 2_665 ?
Mn4 S2 2.389(5) 2_665 ?
Mn4 S2 2.392(5) . ?
Mn4 Mn3 2.658(4) 2_665 ?
Cr3 S2 2.404(9) 2_665 ?
Cr3 S2 2.390(8) . ?
Cr3 Cr4 2.606(14) 2_665 ?
Cr3 Cr4 2.706(15) . ?
Cr4 S2 2.412(17) . ?
Cr4 S2 2.369(16) 2_665 ?
Cr4 Cr3 2.606(14) 2_665 ?
S1 Cr2 2.25(4) 2_766 ?
S1 Mn1 2.426(15) 2_766 ?
S1 Mn2 2.439(13) 2_766 ?
S1 Cr1 2.26(5) 2_766 ?
S2 Mn3 2.379(3) 2_665 ?
S2 Mn4 2.389(5) 2_665 ?
S2 Cr3 2.404(9) 2_665 ?
S2 Cr4 2.369(16) 2_665 ?
 
loop_
 _geom_angle_atom_site_label_1
 _geom_angle_atom_site_label_2
 _geom_angle_atom_site_label_3
 _geom_angle
 _geom_angle_site_symmetry_1
 _geom_angle_site_symmetry_3
 _geom_angle_publ_flag
O1 C1 Cr1 175.2(18) . . ?
O1 C1 Mn1 178.2(9) . . ?
Cr1 C1 Mn1 4(2) . . ?
O2 C2 Cr1 177.4(15) . . ?
O2 C2 Mn1 176.5(8) . . ?
Cr1 C2 Mn1 6.0(17) . . ?
O3 C3 Mn1 158.5(9) . . ?
O3 C3 Cr1 161.2(19) . . ?
Mn1 C3 Cr1 4(2) . . ?
O3 C3 Cr2 127.8(12) . . ?
Mn1 C3 Cr2 73.7(13) . . ?
Cr1 C3 Cr2 71(2) . . ?
O3 C3 Mn2 124.2(7) . . ?
Mn1 C3 Mn2 77.3(7) . . ?
Cr1 C3 Mn2 74.3(18) . . ?
Cr2 C3 Mn2 4.5(13) . . ?
O4 C4 Mn2 174.9(9) . . ?
O4 C4 Cr2 175(2) . . ?
Mn2 C4 Cr2 2(3) . . ?
O5 C5 Mn2 176.0(7) . . ?
O5 C5 Cr2 177(2) . . ?
Mn2 C5 Cr2 6.2(19) . . ?
O6 C6 Mn2 159.3(8) . . ?
O6 C6 Cr2 163.1(19) . . ?
Mn2 C6 Cr2 6(2) . . ?
O6 C6 Cr1 126.6(14) . 2_766 ?
Mn2 C6 Cr1 74.1(14) . 2_766 ?
Cr2 C6 Cr1 70(2) . 2_766 ?
O6 C6 Mn1 123.6(7) . 2_766 ?
Mn2 C6 Mn1 77.1(7) . 2_766 ?
Cr2 C6 Mn1 72.6(17) . 2_766 ?
Cr1 C6 Mn1 3.7(16) 2_766 2_766 ?
O7 C7 Mn3 176.0(6) . . ?
O7 C7 Cr3 167.7(6) . . ?
Mn3 C7 Cr3 16.4(2) . . ?
O8 C8 Cr3 165.8(6) . . ?
O8 C8 Mn3 177.8(6) . . ?
Cr3 C8 Mn3 16.20(19) . . ?
O9 C9 Cr3 147.2(6) . . ?
O9 C9 Mn3 149.4(6) . . ?
Cr3 C9 Mn3 2.4(3) . . ?
O9 C9 Mn4 134.1(6) . . ?
Cr3 C9 Mn4 78.7(3) . . ?
Mn3 C9 Mn4 76.5(3) . . ?
O10 C10 Mn4 174.3(6) . . ?
O10 C10 Cr4 171.1(7) . . ?
Mn4 C10 Cr4 13.5(4) . . ?
O11 C11 Cr4 147.2(7) . . ?
O11 C11 Mn4 148.4(6) . . ?
Cr4 C11 Mn4 1.4(5) . . ?
O11 C11 Mn3 133.8(6) . 2_665 ?
Cr4 C11 Mn3 79.0(5) . 2_665 ?
Mn4 C11 Mn3 77.8(3) . 2_665 ?
O12 C12 Mn4 175.9(6) . . ?
O12 C12 Cr4 169.9(6) . . ?
Mn4 C12 Cr4 13.3(4) . . ?
N1 C13 H13A 109.4 . . ?
N1 C13 H13B 109.4 . . ?
H13A C13 H13B 109.5 . . ?
N1 C13 H13C 109.6 . . ?
H13A C13 H13C 109.5 . . ?
H13B C13 H13C 109.5 . . ?
N1 C14 H14A 109.4 . . ?
N1 C14 H14B 109.5 . . ?
H14A C14 H14B 109.5 . . ?
N1 C14 H14C 109.5 . . ?
H14A C14 H14C 109.5 . . ?
H14B C14 H14C 109.5 . . ?
N1 C15 H15A 109.4 . . ?
N1 C15 H15B 109.6 . . ?
H15A C15 H15B 109.5 . . ?
N1 C15 H15C 109.5 . . ?
H15A C15 H15C 109.5 . . ?
H15B C15 H15C 109.5 . . ?
C17 C16 N1 113.8(5) . . ?
C22 C17 C18 118.9(7) . . ?
C22 C17 C16 121.3(6) . . ?
C18 C17 C16 119.6(6) . . ?
C19 C18 C17 120.1(8) . . ?
C19 C18 H18 119.9 . . ?
C17 C18 H18 120.0 . . ?
C20 C19 C18 120.4(8) . . ?
C20 C19 H19 119.8 . . ?
C18 C19 H19 119.8 . . ?
C19 C20 C21 120.3(9) . . ?
C19 C20 H20 119.9 . . ?
C21 C20 H20 119.9 . . ?
C20 C21 C22 120.3(8) . . ?
C20 C21 H21 119.8 . . ?
C22 C21 H21 119.9 . . ?
C17 C22 C21 120.0(7) . . ?
C17 C22 H22 120.0 . . ?
C21 C22 H22 120.0 . . ?
N2 C23 H23A 109.4 . . ?
N2 C23 H23B 109.5 . . ?
H23A C23 H23B 109.5 . . ?
N2 C23 H23C 109.5 . . ?
H23A C23 H23C 109.5 . . ?
H23B C23 H23C 109.5 . . ?
N2 C24 H24A 109.4 . . ?
N2 C24 H24B 109.5 . . ?
H24A C24 H24B 109.5 . . ?
N2 C24 H24C 109.5 . . ?
H24A C24 H24C 109.5 . . ?
H24B C24 H24C 109.5 . . ?
N2 C25 H25A 109.4 . . ?
N2 C25 H25B 109.5 . . ?
H25A C25 H25B 109.5 . . ?
N2 C25 H25C 109.5 . . ?
H25A C25 H25C 109.5 . . ?
H25B C25 H25C 109.5 . . ?
C27 C26 N2 112.9(5) . . ?
C32 C27 C28 117.5(7) . . ?
C32 C27 C26 121.2(7) . . ?
C28 C27 C26 121.1(7) . . ?
C29 C28 C27 119.5(9) . . ?
C29 C28 H28 120.3 . . ?
C27 C28 H28 120.2 . . ?
C30 C29 C28 120.3(9) . . ?
C30 C29 H29 119.9 . . ?
C28 C29 H29 119.8 . . ?
C31 C30 C29 120.8(9) . . ?
C31 C30 H30 119.6 . . ?
C29 C30 H30 119.6 . . ?
C30 C31 C32 119.2(9) . . ?
C30 C31 H31 120.4 . . ?
C32 C31 H31 120.5 . . ?
C27 C32 C31 122.6(8) . . ?
C27 C32 H32 118.7 . . ?
C31 C32 H32 118.7 . . ?
N3 C33 H33A 109.5 . . ?
N3 C33 H33B 109.5 . . ?
H33A C33 H33B 109.5 . . ?
N3 C33 H33C 109.5 . . ?
H33A C33 H33C 109.5 . . ?
H33B C33 H33C 109.5 . . ?
N3 C34 H34A 109.4 . . ?
N3 C34 H34B 109.5 . . ?
H34A C34 H34B 109.5 . . ?
N3 C34 H34C 109.5 . . ?
H34A C34 H34C 109.5 . . ?
H34B C34 H34C 109.5 . . ?
N3 C35 H35A 109.4 . . ?
N3 C35 H35B 109.5 . . ?
H35A C35 H35B 109.5 . . ?
N3 C35 H35C 109.5 . . ?
H35A C35 H35C 109.5 . . ?
H35B C35 H35C 109.5 . . ?
C37 C36 N3 112.3(6) . . ?
C42 C37 C38 118.9(7) . . ?
C42 C37 C36 122.0(7) . . ?
C38 C37 C36 119.0(7) . . ?
C37 C38 C39 119.6(7) . . ?
C37 C38 H38 120.2 . . ?
C39 C38 H38 120.2 . . ?
C40 C39 C38 120.0(8) . . ?
C40 C39 H39 119.9 . . ?
C38 C39 H39 120.1 . . ?
C39 C40 C41 120.9(8) . . ?
C39 C40 H40 119.6 . . ?
C41 C40 H40 119.4 . . ?
C40 C41 C42 120.0(8) . . ?
C40 C41 H41 120.1 . . ?
C42 C41 H41 119.9 . . ?
C37 C42 C41 120.6(8) . . ?
C37 C42 H42 119.7 . . ?
C41 C42 H42 119.8 . . ?
Cl2 C43 Cl1 112.9(6) . . ?
Cl2 C43 H43A 109.0 . . ?
Cl1 C43 H43A 109.0 . . ?
Cl2 C43 H43B 109.0 . . ?
Cl1 C43 H43B 109.0 . . ?
H43A C43 H43B 107.8 . . ?
C15 N1 C14 109.6(5) . . ?
C15 N1 C13 109.2(5) . . ?
C14 N1 C13 108.5(5) . . ?
C15 N1 C16 111.6(5) . . ?
C14 N1 C16 111.6(5) . . ?
C13 N1 C16 106.3(5) . . ?
C25 N2 C23 109.8(6) . . ?
C25 N2 C24 108.6(6) . . ?
C23 N2 C24 108.3(5) . . ?
C25 N2 C26 111.9(5) . . ?
C23 N2 C26 111.7(5) . . ?
C24 N2 C26 106.3(5) . . ?
C33 N3 C34 108.9(6) . . ?
C33 N3 C35 109.1(5) . . ?
C34 N3 C35 109.0(5) . . ?
C33 N3 C36 112.5(5) . . ?
C34 N3 C36 111.2(5) . . ?
C35 N3 C36 106.1(6) . . ?
C1 Mn1 C3 92.7(6) . . ?
C1 Mn1 C2 92.6(9) . . ?
C3 Mn1 C2 90.6(8) . . ?
C1 Mn1 S1 95.3(8) . . ?
C3 Mn1 S1 103.3(8) . . ?
C2 Mn1 S1 163.6(7) . . ?
C1 Mn1 S1 161.5(9) . 2_766 ?
C3 Mn1 S1 105.0(9) . 2_766 ?
C2 Mn1 S1 92.8(7) . 2_766 ?
S1 Mn1 S1 75.5(5) . 2_766 ?
C1 Mn1 C6 78.7(7) . 2_766 ?
C3 Mn1 C6 167.4(10) . 2_766 ?
C2 Mn1 C6 80.8(7) . 2_766 ?
S1 Mn1 C6 86.7(5) . 2_766 ?
S1 Mn1 C6 84.7(4) 2_766 2_766 ?
C1 Mn1 Mn2 105.9(9) . 2_766 ?
C3 Mn1 Mn2 153.1(10) . 2_766 ?
C2 Mn1 Mn2 107.5(7) . 2_766 ?
S1 Mn1 Mn2 56.5(4) . 2_766 ?
S1 Mn1 Mn2 55.6(5) 2_766 2_766 ?
C6 Mn1 Mn2 39.5(4) 2_766 2_766 ?
C1 Mn1 Mn2 131.1(9) . . ?
C3 Mn1 Mn2 62.5(7) . . ?
C2 Mn1 Mn2 126.3(10) . . ?
S1 Mn1 Mn2 56.1(6) . . ?
S1 Mn1 Mn2 56.5(6) 2_766 . ?
C6 Mn1 Mn2 130.0(7) 2_766 . ?
Mn2 Mn1 Mn2 90.6(6) 2_766 . ?
C6 Mn2 C5 90.0(9) . . ?
C6 Mn2 C4 88.9(6) . . ?
C5 Mn2 C4 89.0(8) . . ?
C6 Mn2 S1 104.7(9) . 2_766 ?
C5 Mn2 S1 91.1(7) . 2_766 ?
C4 Mn2 S1 166.4(12) . 2_766 ?
C6 Mn2 S1 103.6(9) . . ?
C5 Mn2 S1 162.4(8) . . ?
C4 Mn2 S1 102.0(9) . . ?
S1 Mn2 S1 74.9(4) 2_766 . ?
C6 Mn2 C3 166.8(8) . . ?
C5 Mn2 C3 83.2(8) . . ?
C4 Mn2 C3 79.7(8) . . ?
S1 Mn2 C3 86.8(5) 2_766 . ?
S1 Mn2 C3 85.4(7) . . ?
C6 Mn2 Mn1 63.4(7) . 2_766 ?
C5 Mn2 Mn1 124.0(11) . 2_766 ?
C4 Mn2 Mn1 134.3(10) . 2_766 ?
S1 Mn2 Mn1 55.1(5) 2_766 2_766 ?
S1 Mn2 Mn1 56.0(5) . 2_766 ?
C3 Mn2 Mn1 129.6(7) . 2_766 ?
C6 Mn2 Mn1 152.8(9) . . ?
C5 Mn2 Mn1 107.8(8) . . ?
C4 Mn2 Mn1 111.1(10) . . ?
S1 Mn2 Mn1 56.0(4) 2_766 . ?
S1 Mn2 Mn1 55.6(5) . . ?
C3 Mn2 Mn1 40.2(4) . . ?
Mn1 Mn2 Mn1 89.4(6) 2_766 . ?
C2 Cr1 C1 88(2) . . ?
C2 Cr1 C3 86(2) . . ?
C1 Cr1 C3 84.4(17) . . ?
C2 Cr1 C6 84(2) . 2_766 ?
C1 Cr1 C6 79(2) . 2_766 ?
C3 Cr1 C6 161(3) . 2_766 ?
C2 Cr1 S1 98(2) . 2_766 ?
C1 Cr1 S1 167(3) . 2_766 ?
C3 Cr1 S1 107(3) . 2_766 ?
C6 Cr1 S1 90.8(15) 2_766 2_766 ?
C2 Cr1 S1 173(3) . . ?
C1 Cr1 S1 93(2) . . ?
C3 Cr1 S1 100(2) . . ?
C6 Cr1 S1 90.0(19) 2_766 . ?
S1 Cr1 S1 79.4(17) 2_766 . ?
C2 Cr1 Cr2 126(3) . . ?
C1 Cr1 Cr2 129(3) . . ?
C3 Cr1 Cr2 64(2) . . ?
C6 Cr1 Cr2 134(2) 2_766 . ?
S1 Cr1 Cr2 55.0(19) 2_766 . ?
S1 Cr1 Cr2 57.5(19) . . ?
C2 Cr1 Cr2 118(3) . 2_766 ?
C1 Cr1 Cr2 107(3) . 2_766 ?
C3 Cr1 Cr2 153(3) . 2_766 ?
C6 Cr1 Cr2 44.4(15) 2_766 2_766 ?
S1 Cr1 Cr2 60.2(19) 2_766 2_766 ?
S1 Cr1 Cr2 55.4(16) . 2_766 ?
Cr2 Cr1 Cr2 90(2) . 2_766 ?
C4 Cr2 C5 83(2) . . ?
C4 Cr2 C6 81.6(17) . . ?
C5 Cr2 C6 88(3) . . ?
C4 Cr2 C3 77(2) . . ?
C5 Cr2 C3 83(2) . . ?
C6 Cr2 C3 157(3) . . ?
C4 Cr2 S1 98(3) . . ?
C5 Cr2 S1 169(3) . . ?
C6 Cr2 S1 103(3) . . ?
C3 Cr2 S1 86(2) . . ?
C4 Cr2 S1 168(4) . 2_766 ?
C5 Cr2 S1 97(3) . 2_766 ?
C6 Cr2 S1 110(3) . 2_766 ?
C3 Cr2 S1 91.4(18) . 2_766 ?
S1 Cr2 S1 79.4(15) . 2_766 ?
C4 Cr2 Cr1 113(3) . . ?
C5 Cr2 Cr1 113(3) . . ?
C6 Cr2 Cr1 155(3) . . ?
C3 Cr2 Cr1 45.1(15) . . ?
S1 Cr2 Cr1 56.9(19) . . ?
S1 Cr2 Cr1 55.6(14) 2_766 . ?
C4 Cr2 Cr1 128(3) . 2_766 ?
C5 Cr2 Cr1 131(4) . 2_766 ?
C6 Cr2 Cr1 66(3) . 2_766 ?
C3 Cr2 Cr1 134(3) . 2_766 ?
S1 Cr2 Cr1 55.7(19) . 2_766 ?
S1 Cr2 Cr1 59.9(19) 2_766 2_766 ?
Cr1 Cr2 Cr1 90(2) . 2_766 ?
C7 Mn3 C8 93.6(3) . . ?
C7 Mn3 C9 88.7(3) . . ?
C8 Mn3 C9 92.6(3) . . ?
C7 Mn3 C11 79.8(3) . 2_665 ?
C8 Mn3 C11 79.5(3) . 2_665 ?
C9 Mn3 C11 165.4(3) . 2_665 ?
C7 Mn3 S2 95.5(2) . . ?
C8 Mn3 S2 163.8(2) . . ?
C9 Mn3 S2 101.0(2) . . ?
C11 Mn3 S2 89.0(2) 2_665 . ?
C7 Mn3 S2 166.5(2) . 2_665 ?
C8 Mn3 S2 91.1(2) . 2_665 ?
C9 Mn3 S2 103.7(3) . 2_665 ?
C11 Mn3 S2 88.8(2) 2_665 2_665 ?
S2 Mn3 S2 77.09(9) . 2_665 ?
C7 Mn3 Mn4 128.3(2) . . ?
C8 Mn3 Mn4 125.4(3) . . ?
C9 Mn3 Mn4 60.4(2) . . ?
C11 Mn3 Mn4 134.1(2) 2_665 . ?
S2 Mn3 Mn4 56.77(11) . . ?
S2 Mn3 Mn4 56.75(11) 2_665 . ?
C7 Mn3 Mn4 110.2(2) . 2_665 ?
C8 Mn3 Mn4 107.9(2) . 2_665 ?
C9 Mn3 Mn4 150.6(3) . 2_665 ?
C11 Mn3 Mn4 43.7(2) 2_665 2_665 ?
S2 Mn3 Mn4 56.23(10) . 2_665 ?
S2 Mn3 Mn4 56.37(11) 2_665 2_665 ?
Mn4 Mn3 Mn4 90.32(14) . 2_665 ?
C10 Mn4 C12 89.8(4) . . ?
C10 Mn4 C11 90.9(4) . . ?
C12 Mn4 C11 90.2(3) . . ?
C10 Mn4 C9 82.7(3) . . ?
C12 Mn4 C9 80.3(3) . . ?
C11 Mn4 C9 168.6(4) . . ?
C10 Mn4 S2 95.6(3) . 2_665 ?
C12 Mn4 S2 168.0(3) . 2_665 ?
C11 Mn4 S2 100.4(3) . 2_665 ?
C9 Mn4 S2 89.7(2) . 2_665 ?
C10 Mn4 S2 167.8(3) . . ?
C12 Mn4 S2 96.1(3) . . ?
C11 Mn4 S2 99.9(3) . . ?
C9 Mn4 S2 87.7(2) . . ?
S2 Mn4 S2 76.78(14) 2_665 . ?
C10 Mn4 Mn3 111.3(2) . . ?
C12 Mn4 Mn3 111.6(3) . . ?
C11 Mn4 Mn3 148.2(3) . . ?
C9 Mn4 Mn3 43.13(19) . . ?
S2 Mn4 Mn3 56.40(10) 2_665 . ?
S2 Mn4 Mn3 56.53(10) . . ?
C10 Mn4 Mn3 127.4(3) . 2_665 ?
C12 Mn4 Mn3 127.6(3) . 2_665 ?
C11 Mn4 Mn3 58.5(2) . 2_665 ?
C9 Mn4 Mn3 132.8(2) . 2_665 ?
S2 Mn4 Mn3 56.10(10) 2_665 2_665 ?
S2 Mn4 Mn3 55.92(10) . 2_665 ?
Mn3 Mn4 Mn3 89.68(14) . 2_665 ?
C9 Cr3 C8 77.4(4) . . ?
C9 Cr3 C7 74.5(4) . . ?
C8 Cr3 C7 93.2(5) . . ?
C9 Cr3 S2 89.3(3) . 2_665 ?
C8 Cr3 S2 90.0(4) . 2_665 ?
C7 Cr3 S2 162.3(4) . 2_665 ?
C9 Cr3 S2 87.7(3) . . ?
C8 Cr3 S2 160.0(4) . . ?
C7 Cr3 S2 95.5(4) . . ?
S2 Cr3 S2 76.5(2) 2_665 . ?
C9 Cr3 Cr4 134.0(5) . 2_665 ?
C8 Cr3 Cr4 127.5(6) . 2_665 ?
C7 Cr3 Cr4 130.8(6) . 2_665 ?
S2 Cr3 Cr4 57.4(4) 2_665 2_665 ?
S2 Cr3 Cr4 56.4(4) . 2_665 ?
C9 Cr3 Cr4 44.3(3) . . ?
C8 Cr3 Cr4 104.1(5) . . ?
C7 Cr3 Cr4 107.5(5) . . ?
S2 Cr3 Cr4 54.9(4) 2_665 . ?
S2 Cr3 Cr4 56.1(3) . . ?
Cr4 Cr3 Cr4 89.8(5) 2_665 . ?
C11 Cr4 C12 77.3(5) . . ?
C11 Cr4 C10 78.8(6) . . ?
C12 Cr4 C10 89.1(8) . . ?
C11 Cr4 S2 88.5(5) . . ?
C12 Cr4 S2 94.5(7) . . ?
C10 Cr4 S2 165.7(7) . . ?
C11 Cr4 S2 89.9(5) . 2_665 ?
C12 Cr4 S2 164.8(7) . 2_665 ?
C10 Cr4 S2 96.6(8) . 2_665 ?
S2 Cr4 S2 76.8(5) . 2_665 ?
C11 Cr4 Cr3 42.8(3) . 2_665 ?
C12 Cr4 Cr3 107.6(6) . 2_665 ?
C10 Cr4 Cr3 108.6(6) . 2_665 ?
S2 Cr4 Cr3 57.1(4) . 2_665 ?
S2 Cr4 Cr3 57.2(4) 2_665 2_665 ?
C11 Cr4 Cr3 133.0(7) . . ?
C12 Cr4 Cr3 128.5(8) . . ?
C10 Cr4 Cr3 131.0(7) . . ?
S2 Cr4 Cr3 55.3(4) . . ?
S2 Cr4 Cr3 56.1(4) 2_665 . ?
Cr3 Cr4 Cr3 90.2(5) 2_665 . ?
Cr2 S1 Cr2 100.6(15) . 2_766 ?
Cr2 S1 Mn1 65.9(14) . . ?
Cr2 S1 Mn1 68.6(17) 2_766 . ?
Cr2 S1 Mn1 66.1(17) . 2_766 ?
Cr2 S1 Mn1 67.4(18) 2_766 2_766 ?
Mn1 S1 Mn1 104.5(5) . 2_766 ?
Cr2 S1 Mn2 100.5(14) . 2_766 ?
Cr2 S1 Mn2 0(2) 2_766 2_766 ?
Mn1 S1 Mn2 68.4(6) . 2_766 ?
Mn1 S1 Mn2 67.5(6) 2_766 2_766 ?
Cr2 S1 Cr1 64(2) . 2_766 ?
Cr2 S1 Cr1 69(2) 2_766 2_766 ?
Mn1 S1 Cr1 104.4(17) . 2_766 ?
Mn1 S1 Cr1 2.4(18) 2_766 2_766 ?
Mn2 S1 Cr1 69.4(16) 2_766 2_766 ?
Cr2 S1 Mn2 4.5(15) . . ?
Cr2 S1 Mn2 105.2(19) 2_766 . ?
Mn1 S1 Mn2 68.3(6) . . ?
Mn1 S1 Mn2 68.4(6) 2_766 . ?
Mn2 S1 Mn2 105.1(4) 2_766 . ?
Cr1 S1 Mn2 66.3(15) 2_766 . ?
Cr2 S1 Cr1 66(2) . . ?
Cr2 S1 Cr1 65(2) 2_766 . ?
Mn1 S1 Cr1 4.4(13) . . ?
Mn1 S1 Cr1 100.7(14) 2_766 . ?
Mn2 S1 Cr1 64.5(12) 2_766 . ?
Cr1 S1 Cr1 100.6(17) 2_766 . ?
Mn2 S1 Cr1 68.3(16) . . ?
Mn3 S2 Mn3 102.91(9) . 2_665 ?
Mn3 S2 Mn4 67.67(9) . 2_665 ?
Mn3 S2 Mn4 66.84(9) 2_665 2_665 ?
Mn3 S2 Mn4 66.71(9) . . ?
Mn3 S2 Mn4 67.72(10) 2_665 . ?
Mn4 S2 Mn4 103.22(14) 2_665 . ?
Mn3 S2 Cr4 57.7(3) . . ?
Mn3 S2 Cr4 75.5(3) 2_665 . ?
Mn4 S2 Cr4 101.8(4) 2_665 . ?
Mn4 S2 Cr4 10.0(3) . . ?
Mn3 S2 Cr3 101.6(2) . 2_665 ?
Mn3 S2 Cr3 12.20(14) 2_665 2_665 ?
Mn4 S2 Cr3 76.83(18) 2_665 2_665 ?
Mn4 S2 Cr3 57.01(19) . 2_665 ?
Cr4 S2 Cr3 65.5(3) . 2_665 ?
Mn3 S2 Cr4 76.2(3) . 2_665 ?
Mn3 S2 Cr4 58.3(3) 2_665 2_665 ?
Mn4 S2 Cr4 10.1(3) 2_665 2_665 ?
Mn4 S2 Cr4 102.9(5) . 2_665 ?
Cr4 S2 Cr4 103.2(5) . 2_665 ?
Cr3 S2 Cr4 69.0(4) 2_665 2_665 ?
Mn3 S2 Cr3 12.24(14) . . ?
Mn3 S2 Cr3 102.2(2) 2_665 . ?
Mn4 S2 Cr3 57.23(18) 2_665 . ?
Mn4 S2 Cr3 77.03(18) . . ?
Cr4 S2 Cr3 68.6(3) . . ?
Cr3 S2 Cr3 103.5(2) 2_665 . ?
Cr4 S2 Cr3 66.4(3) 2_665 . ?
 
_diffrn_measured_fraction_theta_max    0.982
_diffrn_reflns_theta_full              25.02
_diffrn_measured_fraction_theta_full   0.982
_refine_diff_density_max    1.674
_refine_diff_density_min   -1.487
_refine_diff_density_rms    0.166

#=============================================END

data_2b
 
_audit_creation_method            SHELXL-97
_chemical_name_systematic
;
 ?
;
_chemical_name_common             ?
_chemical_melting_point           ?
_chemical_formula_moiety          'C85 H98 Cl2 Cr2 Mn6 N6 O24 Se4'
_chemical_formula_sum             'C85 H98 Cl2 Cr2 Mn6 N6 O24 Se4'
_chemical_formula_weight          2408.07
 
loop_
 _atom_type_symbol
 _atom_type_description
 _atom_type_scat_dispersion_real
 _atom_type_scat_dispersion_imag
 _atom_type_scat_source
 'C'  'C'   0.0033   0.0016
 'International Tables Vol C Tables 4.2.6.8 and 6.1.1.4'
 'H'  'H'   0.0000   0.0000
 'International Tables Vol C Tables 4.2.6.8 and 6.1.1.4'
 'Mn'  'Mn'   0.3368   0.7283
 'International Tables Vol C Tables 4.2.6.8 and 6.1.1.4'
 'Cr'  'Cr'   0.3209   0.6236
 'International Tables Vol C Tables 4.2.6.8 and 6.1.1.4'
 'Se'  'Se'  -0.0929   2.2259
 'International Tables Vol C Tables 4.2.6.8 and 6.1.1.4'
 'O'  'O'   0.0106   0.0060
 'International Tables Vol C Tables 4.2.6.8 and 6.1.1.4'
 'N'  'N'   0.0061   0.0033
 'International Tables Vol C Tables 4.2.6.8 and 6.1.1.4'
 'Cl'  'Cl'   0.1484   0.1585
 'International Tables Vol C Tables 4.2.6.8 and 6.1.1.4'
 
_symmetry_cell_setting            orthorhombic
_symmetry_space_group_name_H-M    'P c a n'
 
loop_
 _symmetry_equiv_pos_as_xyz
 'x, y, z'
 '-x+1/2, -y+1/2, z+1/2'
 'x, -y, -z+1/2'
 '-x+1/2, y+1/2, -z'
 '-x, -y, -z'
 'x-1/2, y-1/2, -z-1/2'
 '-x, y, z-1/2'
 'x-1/2, -y-1/2, z'
 
_cell_length_a                    13.28570(10)
_cell_length_b                    20.3204(2)
_cell_length_c                    35.3790(4)
_cell_angle_alpha                 90.00
_cell_angle_beta                  90.00
_cell_angle_gamma                 90.00
_cell_volume                      9551.29(16)
_cell_formula_units_Z             4
_cell_measurement_temperature     200(2)
_cell_measurement_reflns_used     37583
_cell_measurement_theta_min       2.037
_cell_measurement_theta_max       25.682
 
_exptl_crystal_description        prism
_exptl_crystal_colour             black
_exptl_crystal_size_max           0.43
_exptl_crystal_size_mid           0.4
_exptl_crystal_size_min           0.2
_exptl_crystal_density_meas       ?
_exptl_crystal_density_diffrn     1.675
_exptl_crystal_density_method     'not measured'
_exptl_crystal_F_000              4840
_exptl_absorpt_coefficient_mu     2.639
_exptl_absorpt_correction_type    multi-scan
_exptl_absorpt_correction_T_min   0.3372
_exptl_absorpt_correction_T_max   0.4606
_exptl_absorpt_process_details
;
 ?
;
 
_exptl_special_details
;
 ?
;
 
_diffrn_ambient_temperature       200(2)
_diffrn_radiation_wavelength      0.71073
_diffrn_radiation_type            MoK\a
_diffrn_radiation_source          'fine-focus sealed tube'
_diffrn_radiation_monochromator   graphite
_diffrn_measurement_device_type   KappaCCD
_diffrn_measurement_method        'CCD rotation images, thick slices'
_diffrn_detector_area_resol_mean  9
_diffrn_standards_number          ?
_diffrn_standards_interval_count  ?
_diffrn_standards_interval_time   ?
_diffrn_standards_decay_%         ?
_diffrn_reflns_number             33794
_diffrn_reflns_av_R_equivalents   0.0513
_diffrn_reflns_av_sigmaI/netI     0.0427
_diffrn_reflns_limit_h_min        -14
_diffrn_reflns_limit_h_max        16
_diffrn_reflns_limit_k_min        -22
_diffrn_reflns_limit_k_max        24
_diffrn_reflns_limit_l_min        -43
_diffrn_reflns_limit_l_max        39
_diffrn_reflns_theta_min          2.16
_diffrn_reflns_theta_max          25.68
_reflns_number_total              8819
_reflns_number_gt                 6940
_reflns_threshold_expression      >2sigma(I)
 
_computing_data_collection        'Collect (Nonius BV, 1997-2000)'
_computing_cell_refinement        'HKL Scalepack (Otwinowski & Minor 1997)'
_computing_data_reduction         'HKL Denzo and Scalepack'
_computing_structure_solution     'SHELXS-86 (Sheldrick, 1986)'
_computing_structure_refinement   'SHELXL-97 (Sheldrick, 1997)'
_computing_molecular_graphics     'Ortep-3 for Windows (Farrugia, 1997)'
_computing_publication_material   'WinGX publication routines (Farrugia, 1999)'
 
_refine_special_details
;
 Refinement of F^2^ against ALL reflections.  The weighted R-factor wR and
 goodness of fit S are based on F^2^, conventional R-factors R are based
 on F, with F set to zero for negative F^2^. The threshold expression of
 F^2^ > 2sigma(F^2^) is used only for calculating R-factors(gt) etc. and is
 not relevant to the choice of reflections for refinement.  R-factors based
 on F^2^ are statistically about twice as large as those based on F, and R-
 factors based on ALL data will be even larger.
;
 
_refine_ls_structure_factor_coef  Fsqd
_refine_ls_matrix_type            full
_refine_ls_weighting_scheme       calc
_refine_ls_weighting_details
 'calc w=1/[\s^2^(Fo^2^)+(0.0544P)^2^+8.9418P] where P=(Fo^2^+2Fc^2^)/3'
_atom_sites_solution_primary      direct
_atom_sites_solution_secondary    difmap
_atom_sites_solution_hydrogens    geom
_refine_ls_hydrogen_treatment     fixed
_refine_ls_extinction_method      none
_refine_ls_extinction_coef        ?
_refine_ls_number_reflns          8819
_refine_ls_number_parameters      589
_refine_ls_number_restraints      0
_refine_ls_R_factor_all           0.0595
_refine_ls_R_factor_gt            0.0402
_refine_ls_wR_factor_ref          0.1127
_refine_ls_wR_factor_gt           0.1013
_refine_ls_goodness_of_fit_ref    1.100
_refine_ls_restrained_S_all       1.100
_refine_ls_shift/su_max           0.021
_refine_ls_shift/su_mean          0.001
 
loop_
 _atom_site_label
 _atom_site_type_symbol
 _atom_site_fract_x
 _atom_site_fract_y
 _atom_site_fract_z
 _atom_site_U_iso_or_equiv
 _atom_site_adp_type
 _atom_site_occupancy
 _atom_site_symmetry_multiplicity
 _atom_site_calc_flag
 _atom_site_refinement_flags
 _atom_site_disorder_assembly
 _atom_site_disorder_group
Se1 Se 0.19807(4) 0.0000 0.2500 0.03008(15) Uani 1 2 d S . .
Se2 Se -0.04153(4) 0.0000 0.2500 0.02978(15) Uani 1 2 d S . .
Se3 Se -0.06400(3) 0.49075(2) 0.037696(11) 0.02974(12) Uani 1 1 d . . .
Mn1 Mn 0.0788(6) -0.0115(2) 0.3046(2) 0.0251(7) Uani 0.75 1 d P . .
Cr1 Cr 0.0715(19) -0.0107(8) 0.3029(7) 0.034(3) Uani 0.25 1 d P . .
Mn2 Mn 0.0795(4) 0.09367(15) 0.25682(13) 0.0247(8) Uani 0.75 1 d P . .
Cr2 Cr 0.0775(12) 0.0954(6) 0.2575(4) 0.034(3) Uani 0.25 1 d P . .
Mn3 Mn 0.1146(7) 0.5246(3) 0.0297(3) 0.0245(15) Uani 0.50 1 d P . .
Cr3 Cr 0.1160(8) 0.5203(4) 0.0291(3) 0.036(2) Uani 0.50 1 d P . .
Mn4 Mn -0.03749(5) 0.59268(3) -0.001189(16) 0.02869(15) Uani 1 1 d . . .
Cl1 Cl 0.61038(16) 0.03794(10) 0.21615(6) 0.1088(7) Uani 1 1 d . . .
O1 O 0.0744(3) -0.14655(15) 0.33429(9) 0.0648(11) Uani 1 1 d . . .
O2 O 0.2237(2) 0.01356(16) 0.36464(9) 0.0502(8) Uani 1 1 d . . .
O3 O -0.0767(2) 0.01485(15) 0.36207(10) 0.0496(8) Uani 1 1 d . . .
O4 O 0.0714(2) 0.14508(14) 0.33479(8) 0.0365(7) Uani 1 1 d . . .
O5 O -0.0595(2) 0.20462(15) 0.24420(9) 0.0445(8) Uani 1 1 d . . .
O6 O 0.2385(2) 0.19089(14) 0.24163(9) 0.0433(7) Uani 1 1 d . . .
O7 O 0.3337(2) 0.52158(15) 0.01890(10) 0.0506(8) Uani 1 1 d . . .
O8 O 0.1544(3) 0.51151(13) 0.11073(8) 0.0440(8) Uani 1 1 d . . .
O9 O 0.1529(2) 0.66334(15) 0.04338(9) 0.0465(8) Uani 1 1 d . . .
O10 O -0.1048(2) 0.68621(14) 0.05763(9) 0.0486(8) Uani 1 1 d . . .
O11 O -0.2322(2) 0.62868(15) -0.03565(9) 0.0470(8) Uani 1 1 d . . .
O12 O 0.0466(2) 0.70232(13) -0.04641(8) 0.0373(7) Uani 1 1 d . . .
N1 N -0.0829(2) 0.35308(16) 0.33455(9) 0.0319(8) Uiso 1 1 d . . .
N2 N 0.2580(2) 0.31085(16) 0.13412(9) 0.0335(8) Uiso 1 1 d . . .
N3 N -0.0571(2) 0.14626(16) -0.04973(10) 0.0323(8) Uiso 1 1 d . . .
C1 C 0.0758(3) -0.0967(2) 0.31748(13) 0.0416(11) Uani 1 1 d . . .
C2 C 0.1683(3) 0.00364(19) 0.33972(12) 0.0322(9) Uani 1 1 d . . .
C3 C -0.0187(3) 0.00493(18) 0.33849(12) 0.0309(9) Uani 1 1 d . . .
C4 C 0.0759(3) 0.1156(2) 0.30619(12) 0.0330(9) Uani 1 1 d . . .
C5 C -0.0079(3) 0.15842(19) 0.24849(10) 0.0278(8) Uani 1 1 d . . .
C6 C 0.1768(3) 0.15181(19) 0.24768(10) 0.0285(9) Uani 1 1 d . . .
C7 C 0.2469(3) 0.52105(18) 0.02151(12) 0.0309(9) Uani 1 1 d . . .
C8 C 0.1384(3) 0.51401(18) 0.07872(12) 0.0310(9) Uani 1 1 d . . .
C9 C 0.1229(3) 0.6115(2) 0.03464(11) 0.0387(10) Uani 1 1 d . . .
C10 C -0.0775(3) 0.64796(19) 0.03507(11) 0.0306(9) Uani 1 1 d . . .
C11 C -0.1576(3) 0.6054(2) -0.02371(12) 0.0376(10) Uani 1 1 d . . .
C12 C 0.0152(3) 0.65928(18) -0.02865(10) 0.0263(8) Uani 1 1 d . . .
C13 C -0.0564(3) 0.4070(2) 0.36137(16) 0.0529(13) Uani 1 1 d . . .
H13A H 0.0089 0.4240 0.3552 0.079 Uiso 1 1 calc R . .
H13B H -0.0559 0.3902 0.3867 0.079 Uiso 1 1 calc R . .
H13C H -0.1054 0.4416 0.3594 0.079 Uiso 1 1 calc R . .
C14 C -0.1851(3) 0.3265(2) 0.34443(15) 0.0515(13) Uani 1 1 d . . .
H14A H -0.1840 0.3092 0.3697 0.077 Uiso 1 1 calc R . .
H14B H -0.2027 0.2920 0.3271 0.077 Uiso 1 1 calc R . .
H14C H -0.2340 0.3612 0.3428 0.077 Uiso 1 1 calc R . .
C15 C -0.0857(4) 0.3797(3) 0.29520(14) 0.0622(15) Uani 1 1 d . . .
H15A H -0.0205 0.3966 0.2886 0.093 Uiso 1 1 calc R . .
H15B H -0.1346 0.4144 0.2937 0.093 Uiso 1 1 calc R . .
H15C H -0.1037 0.3451 0.2780 0.093 Uiso 1 1 calc R . .
C16 C -0.0085(3) 0.29649(19) 0.33757(14) 0.0404(10) Uani 1 1 d . . .
H16A H -0.0127 0.2779 0.3628 0.048 Uiso 1 1 calc R . .
H16B H -0.0279 0.2624 0.3198 0.048 Uiso 1 1 calc R . .
C17 C 0.0985(3) 0.31566(18) 0.32995(12) 0.0323(9) Uani 1 1 d . . .
C18 C 0.1374(3) 0.3122(2) 0.29387(13) 0.0472(12) Uani 1 1 d . . .
H18 H 0.0978 0.2961 0.2743 0.057 Uiso 1 1 calc R . .
C19 C 0.2349(3) 0.3327(3) 0.28665(14) 0.0549(13) Uani 1 1 d . . .
H19 H 0.2606 0.3301 0.2623 0.066 Uiso 1 1 calc R . .
C20 C 0.2938(3) 0.3569(2) 0.31552(15) 0.0488(12) Uani 1 1 d . . .
H20 H 0.3586 0.3719 0.3106 0.059 Uiso 1 1 calc R . .
C21 C 0.2564(3) 0.3586(2) 0.35127(14) 0.0458(11) Uani 1 1 d . . .
H21 H 0.2965 0.3743 0.3708 0.055 Uiso 1 1 calc R . .
C22 C 0.1604(3) 0.3377(2) 0.35893(12) 0.0381(10) Uani 1 1 d . . .
H22 H 0.1366 0.3383 0.3837 0.046 Uiso 1 1 calc R . .
C23 C 0.2743(3) 0.3830(2) 0.12846(14) 0.0455(11) Uani 1 1 d . . .
H23A H 0.2643 0.3938 0.1023 0.068 Uiso 1 1 calc R . .
H23B H 0.3417 0.3943 0.1357 0.068 Uiso 1 1 calc R . .
H23C H 0.2274 0.4072 0.1437 0.068 Uiso 1 1 calc R . .
C24 C 0.2730(4) 0.2940(3) 0.17448(12) 0.0605(15) Uani 1 1 d . . .
H24A H 0.2629 0.2476 0.1780 0.091 Uiso 1 1 calc R . .
H24B H 0.2256 0.3180 0.1896 0.091 Uiso 1 1 calc R . .
H24C H 0.3402 0.3055 0.1819 0.091 Uiso 1 1 calc R . .
C25 C 0.3346(3) 0.2738(2) 0.11082(13) 0.0479(12) Uani 1 1 d . . .
H25A H 0.3248 0.2274 0.1141 0.072 Uiso 1 1 calc R . .
H25B H 0.4011 0.2856 0.1189 0.072 Uiso 1 1 calc R . .
H25C H 0.3264 0.2850 0.0846 0.072 Uiso 1 1 calc R . .
C26 C 0.1536(3) 0.29023(19) 0.12088(11) 0.0333(9) Uani 1 1 d . . .
H26A H 0.1491 0.2975 0.0938 0.040 Uiso 1 1 calc R . .
H26B H 0.1459 0.2434 0.1253 0.040 Uiso 1 1 calc R . .
C27 C 0.0671(3) 0.32575(18) 0.13982(11) 0.0294(9) Uani 1 1 d . . .
C28 C 0.0199(3) 0.37762(18) 0.12110(11) 0.0321(9) Uani 1 1 d . . .
H28 H 0.0448 0.3921 0.0980 0.039 Uiso 1 1 calc R . .
C29 C -0.0642(3) 0.4078(2) 0.13675(13) 0.0383(10) Uani 1 1 d . . .
H29 H -0.0953 0.4423 0.1240 0.046 Uiso 1 1 calc R . .
C30 C -0.1012(3) 0.3870(2) 0.17074(12) 0.0386(10) Uani 1 1 d . . .
H30 H -0.1574 0.4075 0.1812 0.046 Uiso 1 1 calc R . .
C31 C -0.0550(3) 0.3353(2) 0.18974(12) 0.0377(10) Uani 1 1 d . . .
H31 H -0.0796 0.3215 0.2130 0.045 Uiso 1 1 calc R . .
C32 C 0.0282(3) 0.3041(2) 0.17383(12) 0.0355(9) Uani 1 1 d . . .
H32 H 0.0576 0.2685 0.1862 0.043 Uiso 1 1 calc R . .
C33 C -0.0880(4) 0.0774(2) -0.04285(14) 0.0547(13) Uani 1 1 d . . .
H33A H -0.0379 0.0557 -0.0278 0.082 Uiso 1 1 calc R . .
H33B H -0.0949 0.0549 -0.0666 0.082 Uiso 1 1 calc R . .
H33C H -0.1513 0.0768 -0.0297 0.082 Uiso 1 1 calc R . .
C34 C 0.0405(3) 0.1464(2) -0.07076(13) 0.0444(11) Uani 1 1 d . . .
H34A H 0.0910 0.1246 -0.0559 0.067 Uiso 1 1 calc R . .
H34B H 0.0609 0.1909 -0.0755 0.067 Uiso 1 1 calc R . .
H34C H 0.0323 0.1236 -0.0943 0.067 Uiso 1 1 calc R . .
C35 C -0.1344(4) 0.1801(3) -0.07347(13) 0.0542(13) Uani 1 1 d . . .
H35A H -0.1977 0.1805 -0.0603 0.081 Uiso 1 1 calc R . .
H35B H -0.1419 0.1570 -0.0970 0.081 Uiso 1 1 calc R . .
H35C H -0.1134 0.2245 -0.0783 0.081 Uiso 1 1 calc R . .
C36 C -0.0490(3) 0.1848(2) -0.01266(11) 0.0339(9) Uani 1 1 d . . .
H36A H -0.0318 0.2301 -0.0185 0.041 Uiso 1 1 calc R . .
H36B H -0.1145 0.1851 -0.0005 0.041 Uiso 1 1 calc R . .
C37 C 0.0271(3) 0.15831(18) 0.01482(11) 0.0311(9) Uani 1 1 d . . .
C38 C 0.1263(3) 0.1803(2) 0.01390(12) 0.0391(10) Uani 1 1 d . . .
H38 H 0.1465 0.2100 -0.0046 0.047 Uiso 1 1 calc R . .
C39 C 0.1947(3) 0.1579(2) 0.04034(14) 0.0501(12) Uani 1 1 d . . .
H39 H 0.2612 0.1721 0.0393 0.060 Uiso 1 1 calc R . .
C40 C 0.1654(4) 0.1152(2) 0.06811(13) 0.0529(13) Uani 1 1 d . . .
H40 H 0.2119 0.1004 0.0858 0.064 Uiso 1 1 calc R . .
C41 C 0.0670(4) 0.0940(2) 0.06989(13) 0.0481(12) Uani 1 1 d . . .
H41 H 0.0469 0.0653 0.0889 0.058 Uiso 1 1 calc R . .
C42 C -0.0017(3) 0.1156(2) 0.04334(12) 0.0379(10) Uani 1 1 d . . .
H42 H -0.0681 0.1012 0.0446 0.046 Uiso 1 1 calc R . .
C43 C 0.6867(6) 0.0000 0.2500 0.079(3) Uani 1 2 d S . .
 
loop_
 _atom_site_aniso_label
 _atom_site_aniso_U_11
 _atom_site_aniso_U_22
 _atom_site_aniso_U_33
 _atom_site_aniso_U_23
 _atom_site_aniso_U_13
 _atom_site_aniso_U_12
Se1 0.0203(3) 0.0295(3) 0.0404(3) -0.0007(2) 0.000 0.000
Se2 0.0196(3) 0.0329(3) 0.0368(3) 0.0004(2) 0.000 0.000
Se3 0.0275(2) 0.0368(2) 0.0249(2) 0.00852(16) 0.00574(16) 0.00588(16)
Mn1 0.0238(14) 0.0246(13) 0.0270(14) -0.0014(8) -0.0013(10) 0.0007(8)
Cr1 0.022(4) 0.055(6) 0.024(4) 0.001(3) -0.001(3) 0.000(3)
Mn2 0.0225(12) 0.0135(10) 0.0382(15) 0.0034(8) 0.0013(9) 0.0000(7)
Cr2 0.022(4) 0.055(6) 0.024(4) 0.001(3) -0.001(3) 0.000(3)
Mn3 0.024(3) 0.0211(18) 0.029(3) 0.0046(17) 0.0013(19) 0.0058(17)
Cr3 0.021(3) 0.067(4) 0.021(3) 0.009(3) -0.001(2) -0.002(3)
Mn4 0.0324(3) 0.0260(3) 0.0277(3) 0.0025(2) 0.0046(3) 0.0020(2)
Cl1 0.1098(15) 0.1220(16) 0.0947(14) 0.0508(12) -0.0192(12) -0.0134(12)
O1 0.131(3) 0.0272(18) 0.0367(19) 0.0037(14) -0.004(2) -0.0032(19)
O2 0.0446(19) 0.060(2) 0.047(2) 0.0060(15) -0.0160(16) -0.0139(15)
O3 0.048(2) 0.052(2) 0.049(2) 0.0001(15) 0.0222(17) 0.0032(15)
O4 0.0407(17) 0.0364(17) 0.0325(17) 0.0006(13) -0.0015(13) 0.0013(12)
O5 0.0362(16) 0.0418(19) 0.056(2) 0.0176(15) 0.0041(14) 0.0111(14)
O6 0.0349(16) 0.0396(18) 0.055(2) 0.0050(14) 0.0117(14) -0.0124(14)
O7 0.0270(17) 0.053(2) 0.072(2) -0.0101(17) 0.0033(16) -0.0028(14)
O8 0.066(2) 0.0341(17) 0.0324(18) 0.0010(13) -0.0090(16) 0.0017(14)
O9 0.059(2) 0.0386(19) 0.0415(19) -0.0008(14) -0.0067(16) 0.0055(15)
O10 0.063(2) 0.0375(18) 0.0449(19) -0.0109(14) 0.0192(16) 0.0037(15)
O11 0.0331(17) 0.057(2) 0.051(2) 0.0109(15) -0.0077(15) 0.0087(14)
O12 0.0481(17) 0.0299(16) 0.0339(16) 0.0059(13) 0.0075(13) -0.0047(13)
C1 0.050(3) 0.033(3) 0.041(3) -0.009(2) 0.000(2) 0.000(2)
C2 0.032(2) 0.032(2) 0.033(2) 0.0061(17) -0.0002(19) -0.0032(17)
C3 0.032(2) 0.028(2) 0.033(2) 0.0052(16) -0.0016(19) -0.0026(16)
C4 0.023(2) 0.041(2) 0.036(2) 0.0081(19) -0.0019(18) -0.0018(17)
C5 0.0210(18) 0.035(2) 0.027(2) 0.0038(16) 0.0007(16) -0.0050(17)
C6 0.028(2) 0.029(2) 0.028(2) 0.0002(16) 0.0031(16) 0.0050(17)
C7 0.034(2) 0.022(2) 0.037(2) -0.0027(17) 0.0001(18) -0.0013(16)
C8 0.031(2) 0.021(2) 0.041(3) 0.0025(17) -0.0043(19) 0.0003(15)
C9 0.050(3) 0.037(3) 0.029(2) 0.0062(19) 0.012(2) 0.015(2)
C10 0.033(2) 0.028(2) 0.031(2) 0.0074(17) 0.0018(18) 0.0012(16)
C11 0.034(2) 0.047(3) 0.032(2) 0.0107(19) 0.0056(19) -0.0055(19)
C12 0.026(2) 0.027(2) 0.025(2) -0.0019(16) -0.0020(16) 0.0022(16)
C13 0.035(2) 0.044(3) 0.080(4) -0.027(3) 0.003(2) 0.003(2)
C14 0.024(2) 0.056(3) 0.075(4) -0.008(3) 0.011(2) -0.006(2)
C15 0.043(3) 0.092(4) 0.052(3) 0.019(3) -0.007(2) 0.007(3)
C16 0.029(2) 0.031(2) 0.061(3) -0.005(2) 0.004(2) 0.0002(17)
C17 0.026(2) 0.026(2) 0.045(3) -0.0062(18) 0.0006(18) 0.0038(16)
C18 0.029(2) 0.064(3) 0.048(3) -0.026(2) -0.001(2) 0.002(2)
C19 0.034(3) 0.082(4) 0.049(3) -0.020(3) 0.013(2) 0.005(2)
C20 0.025(2) 0.049(3) 0.072(4) -0.009(2) 0.005(2) -0.0011(19)
C21 0.031(2) 0.054(3) 0.052(3) -0.013(2) -0.012(2) 0.006(2)
C22 0.032(2) 0.045(3) 0.036(2) -0.0012(19) -0.0021(19) 0.0069(19)
C23 0.042(3) 0.032(2) 0.063(3) -0.004(2) -0.004(2) 0.0000(19)
C24 0.062(3) 0.093(4) 0.027(2) 0.012(2) -0.004(2) 0.030(3)
C25 0.051(3) 0.046(3) 0.047(3) -0.003(2) 0.012(2) 0.016(2)
C26 0.043(2) 0.027(2) 0.030(2) -0.0024(16) 0.0046(18) -0.0036(17)
C27 0.031(2) 0.028(2) 0.029(2) -0.0011(16) 0.0030(17) -0.0060(16)
C28 0.039(2) 0.029(2) 0.029(2) 0.0037(16) 0.0005(18) -0.0075(17)
C29 0.038(2) 0.034(2) 0.043(3) 0.0009(19) -0.005(2) -0.0019(18)
C30 0.039(2) 0.035(2) 0.042(3) -0.0054(19) 0.002(2) 0.0026(18)
C31 0.044(2) 0.039(3) 0.030(2) 0.0015(18) 0.0119(19) -0.0048(19)
C32 0.040(2) 0.030(2) 0.036(2) 0.0048(18) 0.0026(19) -0.0028(18)
C33 0.070(3) 0.044(3) 0.050(3) -0.004(2) -0.001(3) -0.019(2)
C34 0.039(2) 0.054(3) 0.040(3) -0.004(2) 0.008(2) 0.005(2)
C35 0.052(3) 0.070(3) 0.041(3) -0.005(2) -0.012(2) 0.020(2)
C36 0.034(2) 0.036(2) 0.032(2) -0.0060(18) 0.0018(18) 0.0029(17)
C37 0.035(2) 0.028(2) 0.030(2) -0.0037(17) 0.0000(18) 0.0036(17)
C38 0.038(2) 0.042(3) 0.037(2) -0.0040(19) 0.000(2) -0.0041(19)
C39 0.035(3) 0.062(3) 0.054(3) -0.012(2) -0.005(2) 0.004(2)
C40 0.058(3) 0.060(3) 0.041(3) -0.007(2) -0.018(2) 0.015(3)
C41 0.071(3) 0.041(3) 0.033(3) 0.004(2) -0.002(2) 0.007(2)
C42 0.040(2) 0.039(2) 0.035(2) 0.0001(19) 0.005(2) 0.0002(19)
C43 0.039(4) 0.082(6) 0.117(8) 0.035(5) 0.000 0.000
 
_geom_special_details
;
 All esds (except the esd in the dihedral angle between two l.s. planes)
 are estimated using the full covariance matrix.  The cell esds are taken
 into account individually in the estimation of esds in distances, angles
 and torsion angles; correlations between esds in cell parameters are only
 used when they are defined by crystal symmetry.  An approximate (isotropic)
 treatment of cell esds is used for estimating esds involving l.s. planes.
;
 
loop_
 _geom_bond_atom_site_label_1
 _geom_bond_atom_site_label_2
 _geom_bond_distance
 _geom_bond_site_symmetry_2
 _geom_bond_publ_flag
Se1 Cr2 2.529(15) 3 ?
Se1 Cr2 2.529(15) . ?
Se1 Mn2 2.482(4) 3 ?
Se1 Mn2 2.482(4) . ?
Se1 Mn1 2.509(7) 3 ?
Se1 Mn1 2.509(7) . ?
Se1 Cr1 2.53(2) 3 ?
Se1 Cr1 2.53(2) . ?
Se2 Cr1 2.41(3) 3 ?
Se2 Cr1 2.41(3) . ?
Se2 Cr2 2.517(14) . ?
Se2 Cr2 2.517(14) 3 ?
Se2 Mn2 2.504(4) . ?
Se2 Mn2 2.504(4) 3 ?
Se2 Mn1 2.519(8) 3 ?
Se2 Mn1 2.519(8) . ?
Se3 Cr3 2.473(10) 5_565 ?
Se3 Cr3 2.484(11) . ?
Se3 Mn3 2.486(10) . ?
Se3 Mn3 2.496(10) 5_565 ?
Se3 Mn4 2.5113(7) . ?
Se3 Mn4 2.5221(7) 5_565 ?
Mn1 C2 1.747(9) . ?
Mn1 C1 1.790(7) . ?
Mn1 C3 1.797(8) . ?
Mn1 C4 2.584(6) . ?
Mn1 Cr2 2.739(15) . ?
Mn1 Cr2 2.782(16) 3 ?
Mn1 Mn2 2.726(7) . ?
Mn1 Mn2 2.740(7) 3 ?
Cr1 C3 1.77(2) . ?
Cr1 C1 1.824(19) . ?
Cr1 C2 1.85(3) . ?
Cr1 Cr2 2.69(2) . ?
Cr1 Mn2 2.68(2) . ?
Cr1 Cr2 2.75(2) 3 ?
Cr1 Mn2 2.71(2) 3 ?
Mn2 C5 1.780(6) . ?
Mn2 C6 1.780(6) . ?
Mn2 C4 1.803(6) . ?
Mn2 C1 2.630(6) 3 ?
Mn2 Cr1 2.71(2) 3 ?
Mn2 Mn1 2.740(7) 3 ?
Cr2 C6 1.781(15) . ?
Cr2 C5 1.740(15) . ?
Cr2 C4 1.770(15) . ?
Cr2 Cr1 2.75(2) 3 ?
Cr2 Mn1 2.782(16) 3 ?
Mn3 C8 1.777(10) . ?
Mn3 C9 1.779(8) . ?
Mn3 C7 1.783(11) . ?
Mn3 Se3 2.496(10) 5_565 ?
Mn3 Mn4 2.681(8) . ?
Mn3 Mn4 2.782(8) 5_565 ?
Cr3 C7 1.760(11) . ?
Cr3 C8 1.785(11) . ?
Cr3 C9 1.866(9) . ?
Cr3 Se3 2.473(10) 5_565 ?
Cr3 Mn4 2.708(9) 5_565 ?
Cr3 Mn4 2.733(9) . ?
Mn4 C10 1.786(4) . ?
Mn4 C11 1.803(4) . ?
Mn4 C12 1.807(4) . ?
Mn4 C9 2.509(5) . ?
Mn4 Se3 2.5221(7) 5_565 ?
Mn4 Cr3 2.708(9) 5_565 ?
Mn4 Mn3 2.782(8) 5_565 ?
Cl1 C43 1.748(5) . ?
O1 C1 1.175(5) . ?
O2 C2 1.166(5) . ?
O3 C3 1.153(5) . ?
O4 C4 1.178(5) . ?
O5 C5 1.172(5) . ?
O6 C6 1.161(5) . ?
O7 C7 1.157(5) . ?
O8 C8 1.154(5) . ?
O9 C9 1.167(5) . ?
O10 C10 1.172(5) . ?
O11 C11 1.176(5) . ?
O12 C12 1.155(4) . ?
N1 C13 1.492(5) . ?
N1 C15 1.494(6) . ?
N1 C14 1.503(5) . ?
N1 C16 1.521(5) . ?
N2 C24 1.482(5) . ?
N2 C23 1.496(5) . ?
N2 C25 1.510(5) . ?
N2 C26 1.523(5) . ?
N3 C33 1.479(5) . ?
N3 C35 1.495(5) . ?
N3 C34 1.495(5) . ?
N3 C36 1.532(5) . ?
C1 Mn2 2.630(6) 3 ?
C13 H13A 0.9600 . ?
C13 H13B 0.9600 . ?
C13 H13C 0.9600 . ?
C14 H14A 0.9600 . ?
C14 H14B 0.9600 . ?
C14 H14C 0.9600 . ?
C15 H15A 0.9600 . ?
C15 H15B 0.9600 . ?
C15 H15C 0.9600 . ?
C16 C17 1.498(5) . ?
C16 H16A 0.9700 . ?
C16 H16B 0.9700 . ?
C17 C18 1.379(6) . ?
C17 C22 1.388(6) . ?
C18 C19 1.384(6) . ?
C18 H18 0.9300 . ?
C19 C20 1.378(6) . ?
C19 H19 0.9300 . ?
C20 C21 1.359(6) . ?
C20 H20 0.9300 . ?
C21 C22 1.371(6) . ?
C21 H21 0.9300 . ?
C22 H22 0.9300 . ?
C23 H23A 0.9600 . ?
C23 H23B 0.9600 . ?
C23 H23C 0.9600 . ?
C24 H24A 0.9600 . ?
C24 H24B 0.9600 . ?
C24 H24C 0.9600 . ?
C25 H25A 0.9600 . ?
C25 H25B 0.9600 . ?
C25 H25C 0.9600 . ?
C26 C27 1.513(5) . ?
C26 H26A 0.9700 . ?
C26 H26B 0.9700 . ?
C27 C32 1.382(5) . ?
C27 C28 1.394(5) . ?
C28 C29 1.389(6) . ?
C28 H28 0.9300 . ?
C29 C30 1.366(6) . ?
C29 H29 0.9300 . ?
C30 C31 1.391(6) . ?
C30 H30 0.9300 . ?
C31 C32 1.393(6) . ?
C31 H31 0.9300 . ?
C32 H32 0.9300 . ?
C33 H33A 0.9600 . ?
C33 H33B 0.9600 . ?
C33 H33C 0.9600 . ?
C34 H34A 0.9600 . ?
C34 H34B 0.9600 . ?
C34 H34C 0.9600 . ?
C35 H35A 0.9600 . ?
C35 H35B 0.9600 . ?
C35 H35C 0.9600 . ?
C36 C37 1.503(6) . ?
C36 H36A 0.9700 . ?
C36 H36B 0.9700 . ?
C37 C42 1.385(6) . ?
C37 C38 1.391(6) . ?
C38 C39 1.381(6) . ?
C38 H38 0.9300 . ?
C39 C40 1.368(7) . ?
C39 H39 0.9300 . ?
C40 C41 1.378(7) . ?
C40 H40 0.9300 . ?
C41 C42 1.381(6) . ?
C41 H41 0.9300 . ?
C42 H42 0.9300 . ?
C43 Cl1 1.748(5) 3 ?
 
loop_
 _geom_angle_atom_site_label_1
 _geom_angle_atom_site_label_2
 _geom_angle_atom_site_label_3
 _geom_angle
 _geom_angle_site_symmetry_1
 _geom_angle_site_symmetry_3
 _geom_angle_publ_flag
Cr2 Se1 Cr2 101.4(7) 3 . ?
Cr2 Se1 Mn2 0.5(4) 3 3 ?
Cr2 Se1 Mn2 101.3(2) . 3 ?
Cr2 Se1 Mn2 101.3(2) 3 . ?
Cr2 Se1 Mn2 0.5(4) . . ?
Mn2 Se1 Mn2 101.24(19) 3 . ?
Cr2 Se1 Mn1 65.9(4) 3 3 ?
Cr2 Se1 Mn1 67.0(4) . 3 ?
Mn2 Se1 Mn1 66.19(16) 3 3 ?
Mn2 Se1 Mn1 66.58(16) . 3 ?
Cr2 Se1 Mn1 67.0(4) 3 . ?
Cr2 Se1 Mn1 65.9(4) . . ?
Mn2 Se1 Mn1 66.58(16) 3 . ?
Mn2 Se1 Mn1 66.19(16) . . ?
Mn1 Se1 Mn1 101.7(4) 3 . ?
Cr2 Se1 Cr1 64.3(6) 3 3 ?
Cr2 Se1 Cr1 65.8(6) . 3 ?
Mn2 Se1 Cr1 64.6(5) 3 3 ?
Mn2 Se1 Cr1 65.4(5) . 3 ?
Mn1 Se1 Cr1 2.6(8) 3 3 ?
Mn1 Se1 Cr1 99.1(4) . 3 ?
Cr2 Se1 Cr1 65.8(6) 3 . ?
Cr2 Se1 Cr1 64.3(6) . . ?
Mn2 Se1 Cr1 65.4(5) 3 . ?
Mn2 Se1 Cr1 64.6(5) . . ?
Mn1 Se1 Cr1 99.1(4) 3 . ?
Mn1 Se1 Cr1 2.6(8) . . ?
Cr1 Se1 Cr1 96.5(12) 3 . ?
Cr1 Se2 Cr1 102.9(11) 3 . ?
Cr1 Se2 Cr2 67.8(6) 3 . ?
Cr1 Se2 Cr2 66.1(5) . . ?
Cr1 Se2 Cr2 66.1(5) 3 3 ?
Cr1 Se2 Cr2 67.8(6) . 3 ?
Cr2 Se2 Cr2 102.1(7) . 3 ?
Cr1 Se2 Mn2 66.8(4) 3 . ?
Cr1 Se2 Mn2 66.0(5) . . ?
Cr2 Se2 Mn2 1.1(5) . . ?
Cr2 Se2 Mn2 101.1(3) 3 . ?
Cr1 Se2 Mn2 66.0(5) 3 3 ?
Cr1 Se2 Mn2 66.8(4) . 3 ?
Cr2 Se2 Mn2 101.1(3) . 3 ?
Cr2 Se2 Mn2 1.1(5) 3 3 ?
Mn2 Se2 Mn2 100.1(2) . 3 ?
Cr1 Se2 Mn1 0.9(7) 3 3 ?
Cr1 Se2 Mn1 102.0(4) . 3 ?
Cr2 Se2 Mn1 67.1(4) . 3 ?
Cr2 Se2 Mn1 65.9(3) 3 3 ?
Mn2 Se2 Mn1 66.12(16) . 3 ?
Mn2 Se2 Mn1 65.73(15) 3 3 ?
Cr1 Se2 Mn1 102.0(4) 3 . ?
Cr1 Se2 Mn1 0.9(7) . . ?
Cr2 Se2 Mn1 65.9(3) . . ?
Cr2 Se2 Mn1 67.1(4) 3 . ?
Mn2 Se2 Mn1 65.73(15) . . ?
Mn2 Se2 Mn1 66.12(16) 3 . ?
Mn1 Se2 Mn1 101.2(3) 3 . ?
Cr3 Se3 Cr3 100.0(3) 5_565 . ?
Cr3 Se3 Mn3 100.5(4) 5_565 . ?
Cr3 Se3 Mn3 2.1(3) . . ?
Cr3 Se3 Mn3 2.0(3) 5_565 5_565 ?
Cr3 Se3 Mn3 99.9(4) . 5_565 ?
Mn3 Se3 Mn3 100.5(3) . 5_565 ?
Cr3 Se3 Mn4 65.8(2) 5_565 . ?
Cr3 Se3 Mn4 66.34(19) . . ?
Mn3 Se3 Mn4 64.89(17) . . ?
Mn3 Se3 Mn4 67.51(17) 5_565 . ?
Cr3 Se3 Mn4 66.3(2) 5_565 5_565 ?
Cr3 Se3 Mn4 65.49(19) . 5_565 ?
Mn3 Se3 Mn4 67.49(16) . 5_565 ?
Mn3 Se3 Mn4 64.59(17) 5_565 5_565 ?
Mn4 Se3 Mn4 101.47(2) . 5_565 ?
C2 Mn1 C1 90.3(4) . . ?
C2 Mn1 C3 89.0(4) . . ?
C1 Mn1 C3 89.7(3) . . ?
C2 Mn1 Se2 164.0(3) . . ?
C1 Mn1 Se2 105.7(3) . . ?
C3 Mn1 Se2 92.1(3) . . ?
C2 Mn1 Se1 95.8(3) . . ?
C1 Mn1 Se1 107.5(3) . . ?
C3 Mn1 Se1 162.1(3) . . ?
Se2 Mn1 Se1 78.6(2) . . ?
C2 Mn1 C4 79.5(2) . . ?
C1 Mn1 C4 163.9(4) . . ?
C3 Mn1 C4 77.8(2) . . ?
Se2 Mn1 C4 85.1(2) . . ?
Se1 Mn1 C4 86.15(19) . . ?
C2 Mn1 Cr2 107.3(4) . . ?
C1 Mn1 Cr2 157.2(5) . . ?
C3 Mn1 Cr2 104.7(5) . . ?
Se2 Mn1 Cr2 57.0(3) . . ?
Se1 Mn1 Cr2 57.4(4) . . ?
C4 Mn1 Cr2 38.7(3) . . ?
C2 Mn1 Cr2 132.4(5) . 3 ?
C1 Mn1 Cr2 66.9(3) . 3 ?
C3 Mn1 Cr2 129.6(5) . 3 ?
Se2 Mn1 Cr2 56.4(3) . 3 ?
Se1 Mn1 Cr2 56.8(3) . 3 ?
C4 Mn1 Cr2 129.0(4) . 3 ?
Cr2 Mn1 Cr2 90.3(4) . 3 ?
C2 Mn1 Mn2 107.5(3) . . ?
C1 Mn1 Mn2 156.4(4) . . ?
C3 Mn1 Mn2 105.7(3) . . ?
Se2 Mn1 Mn2 56.87(17) . . ?
Se1 Mn1 Mn2 56.43(17) . . ?
C4 Mn1 Mn2 39.60(15) . . ?
Cr2 Mn1 Mn2 1.0(4) . . ?
Cr2 Mn1 Mn2 89.5(4) 3 . ?
C2 Mn1 Mn2 132.0(3) . 3 ?
C1 Mn1 Mn2 67.2(2) . 3 ?
C3 Mn1 Mn2 130.2(3) . 3 ?
Se2 Mn1 Mn2 56.68(17) . 3 ?
Se1 Mn1 Mn2 56.24(16) . 3 ?
C4 Mn1 Mn2 128.8(3) . 3 ?
Cr2 Mn1 Mn2 90.1(4) . 3 ?
Cr2 Mn1 Mn2 0.6(4) 3 3 ?
Mn2 Mn1 Mn2 89.2(2) . 3 ?
C3 Cr1 C1 89.6(10) . . ?
C3 Cr1 C2 86.7(10) . . ?
C1 Cr1 C2 86.0(11) . . ?
C3 Cr1 Se2 96.6(11) . . ?
C1 Cr1 Se2 109.0(10) . . ?
C2 Cr1 Se2 164.6(10) . . ?
C3 Cr1 Se1 164.7(10) . . ?
C1 Cr1 Se1 105.7(9) . . ?
C2 Cr1 Se1 92.6(10) . . ?
Se2 Cr1 Se1 80.3(7) . . ?
C3 Cr1 Cr2 107.6(9) . . ?
C1 Cr1 Cr2 159.4(12) . . ?
C2 Cr1 Cr2 105.9(9) . . ?
Se2 Cr1 Cr2 58.8(6) . . ?
Se1 Cr1 Cr2 57.9(6) . . ?
C3 Cr1 Mn2 108.6(9) . . ?
C1 Cr1 Mn2 158.4(11) . . ?
C2 Cr1 Mn2 106.0(8) . . ?
Se2 Cr1 Mn2 58.7(5) . . ?
Se1 Cr1 Mn2 56.9(5) . . ?
Cr2 Cr1 Mn2 1.1(4) . . ?
C3 Cr1 Cr2 133.4(11) . 3 ?
C1 Cr1 Cr2 67.5(6) . 3 ?
C2 Cr1 Cr2 128.7(11) . 3 ?
Se2 Cr1 Cr2 58.0(6) . 3 ?
Se1 Cr1 Cr2 57.1(5) . 3 ?
Cr2 Cr1 Cr2 92.1(8) . 3 ?
Mn2 Cr1 Cr2 91.2(8) . 3 ?
C3 Cr1 Mn2 134.0(11) . 3 ?
C1 Cr1 Mn2 67.8(6) . 3 ?
C2 Cr1 Mn2 128.2(11) . 3 ?
Se2 Cr1 Mn2 58.2(5) . 3 ?
Se1 Cr1 Mn2 56.5(5) . 3 ?
Cr2 Cr1 Mn2 91.8(8) . 3 ?
Mn2 Cr1 Mn2 90.9(7) . 3 ?
Cr2 Cr1 Mn2 0.6(4) 3 3 ?
C5 Mn2 C6 87.3(2) . . ?
C5 Mn2 C4 87.7(3) . . ?
C6 Mn2 C4 91.8(3) . . ?
C5 Mn2 Se1 164.8(3) . . ?
C6 Mn2 Se1 91.8(2) . . ?
C4 Mn2 Se1 107.5(2) . . ?
C5 Mn2 Se2 97.3(2) . . ?
C6 Mn2 Se2 162.4(3) . . ?
C4 Mn2 Se2 105.3(2) . . ?
Se1 Mn2 Se2 79.36(9) . . ?
C5 Mn2 C1 78.8(2) . 3 ?
C6 Mn2 C1 79.4(2) . 3 ?
C4 Mn2 C1 164.1(2) . 3 ?
Se1 Mn2 C1 86.15(17) . 3 ?
Se2 Mn2 C1 84.81(16) . 3 ?
C5 Mn2 Cr1 131.3(6) . . ?
C6 Mn2 Cr1 131.7(6) . . ?
C4 Mn2 Cr1 66.7(5) . . ?
Se1 Mn2 Cr1 58.5(5) . . ?
Se2 Mn2 Cr1 55.3(5) . . ?
C1 Mn2 Cr1 128.8(5) 3 . ?
C5 Mn2 Mn1 132.9(3) . . ?
C6 Mn2 Mn1 129.5(3) . . ?
C4 Mn2 Mn1 66.0(2) . . ?
Se1 Mn2 Mn1 57.38(14) . . ?
Se2 Mn2 Mn1 57.40(17) . . ?
C1 Mn2 Mn1 129.7(2) 3 . ?
Cr1 Mn2 Mn1 2.2(7) . . ?
C5 Mn2 Cr1 107.8(5) . 3 ?
C6 Mn2 Cr1 107.5(6) . 3 ?
C4 Mn2 Cr1 155.4(5) . 3 ?
Se1 Mn2 Cr1 58.1(5) . 3 ?
Se2 Mn2 Cr1 54.9(5) . 3 ?
C1 Mn2 Cr1 39.9(5) 3 3 ?
Cr1 Mn2 Cr1 88.9(7) . 3 ?
Mn1 Mn2 Cr1 89.7(4) . 3 ?
C5 Mn2 Mn1 108.5(3) . 3 ?
C6 Mn2 Mn1 105.2(3) . 3 ?
C4 Mn2 Mn1 156.7(3) . 3 ?
Se1 Mn2 Mn1 57.18(15) . 3 ?
Se2 Mn2 Mn1 57.21(18) . 3 ?
C1 Mn2 Mn1 38.88(17) 3 3 ?
Cr1 Mn2 Mn1 90.0(4) . 3 ?
Mn1 Mn2 Mn1 90.8(2) . 3 ?
Cr1 Mn2 Mn1 2.3(7) 3 3 ?
C6 Cr2 C5 88.5(6) . . ?
C6 Cr2 C4 92.9(7) . . ?
C5 Cr2 C4 90.0(7) . . ?
C6 Cr2 Se1 90.2(7) . . ?
C5 Cr2 Se1 163.3(8) . . ?
C4 Cr2 Se1 106.7(6) . . ?
C6 Cr2 Se2 160.1(8) . . ?
C5 Cr2 Se2 97.9(7) . . ?
C4 Cr2 Se2 105.9(7) . . ?
Se1 Cr2 Se2 78.2(4) . . ?
C6 Cr2 Cr1 130.9(9) . . ?
C5 Cr2 Cr1 132.8(9) . . ?
C4 Cr2 Cr1 66.7(6) . . ?
Se1 Cr2 Cr1 57.8(5) . . ?
Se2 Cr2 Cr1 55.0(6) . . ?
C6 Cr2 Cr1 105.8(8) . 3 ?
C5 Cr2 Cr1 107.4(8) . 3 ?
C4 Cr2 Cr1 154.4(8) . 3 ?
Se1 Cr2 Cr1 57.0(5) . 3 ?
Se2 Cr2 Cr1 54.3(6) . 3 ?
Cr1 Cr2 Cr1 87.8(9) . 3 ?
C6 Cr2 Mn1 128.7(8) . . ?
C5 Cr2 Mn1 134.4(8) . . ?
C4 Cr2 Mn1 65.9(5) . . ?
Se1 Cr2 Mn1 56.7(3) . . ?
Se2 Cr2 Mn1 57.1(3) . . ?
Cr1 Cr2 Mn1 2.2(7) . . ?
Cr1 Cr2 Mn1 88.6(6) 3 . ?
C6 Cr2 Mn1 103.6(7) . 3 ?
C5 Cr2 Mn1 108.0(7) . 3 ?
C4 Cr2 Mn1 155.6(7) . 3 ?
Se1 Cr2 Mn1 56.1(3) . 3 ?
Se2 Cr2 Mn1 56.5(3) . 3 ?
Cr1 Cr2 Mn1 88.9(6) . 3 ?
Cr1 Cr2 Mn1 2.3(7) 3 3 ?
Mn1 Cr2 Mn1 89.6(4) . 3 ?
C8 Mn3 C9 90.7(4) . . ?
C8 Mn3 C7 88.7(5) . . ?
C9 Mn3 C7 89.7(5) . . ?
C8 Mn3 Se3 91.4(4) . . ?
C9 Mn3 Se3 108.8(4) . . ?
C7 Mn3 Se3 161.5(4) . . ?
C8 Mn3 Se3 164.9(4) . 5_565 ?
C9 Mn3 Se3 103.6(4) . 5_565 ?
C7 Mn3 Se3 96.1(4) . 5_565 ?
Se3 Mn3 Se3 79.5(3) . 5_565 ?
C8 Mn3 Mn4 126.5(4) . . ?
C9 Mn3 Mn4 64.8(3) . . ?
C7 Mn3 Mn4 134.2(5) . . ?
Se3 Mn3 Mn4 58.0(2) . . ?
Se3 Mn3 Mn4 58.2(2) 5_565 . ?
C8 Mn3 Mn4 108.4(4) . 5_565 ?
C9 Mn3 Mn4 155.4(5) . 5_565 ?
C7 Mn3 Mn4 105.7(3) . 5_565 ?
Se3 Mn3 Mn4 56.87(19) . 5_565 ?
Se3 Mn3 Mn4 56.51(18) 5_565 5_565 ?
Mn4 Mn3 Mn4 91.0(3) . 5_565 ?
C7 Cr3 C8 89.2(5) . . ?
C7 Cr3 C9 87.6(5) . . ?
C8 Cr3 C9 87.7(4) . . ?
C7 Cr3 Se3 97.5(4) . 5_565 ?
C8 Cr3 Se3 168.6(5) . 5_565 ?
C9 Cr3 Se3 101.8(4) . 5_565 ?
C7 Cr3 Se3 166.4(4) . . ?
C8 Cr3 Se3 91.3(4) . . ?
C9 Cr3 Se3 106.0(4) . . ?
Se3 Cr3 Se3 80.0(3) 5_565 . ?
C7 Cr3 Mn4 109.4(4) . 5_565 ?
C8 Cr3 Mn4 111.2(4) . 5_565 ?
C9 Cr3 Mn4 154.1(5) . 5_565 ?
Se3 Cr3 Mn4 57.8(2) 5_565 5_565 ?
Se3 Cr3 Mn4 57.9(2) . 5_565 ?
C7 Cr3 Mn4 132.3(5) . . ?
C8 Cr3 Mn4 123.3(5) . . ?
C9 Cr3 Mn4 62.8(3) . . ?
Se3 Cr3 Mn4 57.7(2) 5_565 . ?
Se3 Cr3 Mn4 57.3(2) . . ?
Mn4 Cr3 Mn4 91.5(3) 5_565 . ?
C10 Mn4 C11 87.92(19) . . ?
C10 Mn4 C12 91.74(17) . . ?
C11 Mn4 C12 89.86(17) . . ?
C10 Mn4 C9 78.10(16) . . ?
C11 Mn4 C9 162.44(17) . . ?
C12 Mn4 C9 80.11(15) . . ?
C10 Mn4 Se3 94.79(12) . . ?
C11 Mn4 Se3 103.69(13) . . ?
C12 Mn4 Se3 165.13(12) . . ?
C9 Mn4 Se3 88.18(10) . . ?
C10 Mn4 Se3 161.74(13) . 5_565 ?
C11 Mn4 Se3 110.10(14) . 5_565 ?
C12 Mn4 Se3 91.20(12) . 5_565 ?
C9 Mn4 Se3 84.67(10) . 5_565 ?
Se3 Mn4 Se3 78.53(2) . 5_565 ?
C10 Mn4 Mn3 104.8(2) . . ?
C11 Mn4 Mn3 157.1(2) . . ?
C12 Mn4 Mn3 108.3(2) . . ?
C9 Mn4 Mn3 39.9(2) . . ?
Se3 Mn4 Mn3 57.1(2) . . ?
Se3 Mn4 Mn3 57.23(19) 5_565 . ?
C10 Mn4 Cr3 132.9(3) . 5_565 ?
C11 Mn4 Cr3 67.7(2) . 5_565 ?
C12 Mn4 Cr3 126.0(2) . 5_565 ?
C9 Mn4 Cr3 129.8(2) . 5_565 ?
Se3 Mn4 Cr3 56.4(2) . 5_565 ?
Se3 Mn4 Cr3 56.6(2) 5_565 5_565 ?
Mn3 Mn4 Cr3 90.1(2) . 5_565 ?
C10 Mn4 Cr3 106.2(2) . . ?
C11 Mn4 Cr3 155.7(2) . . ?
C12 Mn4 Cr3 109.0(2) . . ?
C9 Mn4 Cr3 41.4(2) . . ?
Se3 Mn4 Cr3 56.3(2) . . ?
Se3 Mn4 Cr3 56.0(2) 5_565 . ?
Mn3 Mn4 Cr3 1.6(4) . . ?
Cr3 Mn4 Cr3 88.5(3) 5_565 . ?
C10 Mn4 Mn3 133.6(2) . 5_565 ?
C11 Mn4 Mn3 68.7(2) . 5_565 ?
C12 Mn4 Mn3 126.1(2) . 5_565 ?
C9 Mn4 Mn3 128.8(2) . 5_565 ?
Se3 Mn4 Mn3 55.98(19) . 5_565 ?
Se3 Mn4 Mn3 55.64(19) 5_565 5_565 ?
Mn3 Mn4 Mn3 89.0(3) . 5_565 ?
Cr3 Mn4 Mn3 1.1(4) 5_565 5_565 ?
Cr3 Mn4 Mn3 87.5(2) . 5_565 ?
C13 N1 C15 109.4(4) . . ?
C13 N1 C14 109.2(3) . . ?
C15 N1 C14 109.0(3) . . ?
C13 N1 C16 110.9(3) . . ?
C15 N1 C16 110.8(3) . . ?
C14 N1 C16 107.4(3) . . ?
C24 N2 C23 109.6(4) . . ?
C24 N2 C25 108.7(3) . . ?
C23 N2 C25 108.5(3) . . ?
C24 N2 C26 110.8(3) . . ?
C23 N2 C26 111.1(3) . . ?
C25 N2 C26 108.0(3) . . ?
C33 N3 C35 109.7(4) . . ?
C33 N3 C34 108.9(3) . . ?
C35 N3 C34 108.4(3) . . ?
C33 N3 C36 111.3(3) . . ?
C35 N3 C36 107.1(3) . . ?
C34 N3 C36 111.4(3) . . ?
O1 C1 Mn1 164.3(4) . . ?
O1 C1 Cr1 165.7(8) . . ?
Mn1 C1 Cr1 3.5(11) . . ?
O1 C1 Mn2 121.8(3) . 3 ?
Mn1 C1 Mn2 73.9(3) . 3 ?
Cr1 C1 Mn2 72.3(7) . 3 ?
O2 C2 Mn1 176.2(4) . . ?
O2 C2 Cr1 175.2(8) . . ?
Mn1 C2 Cr1 1.5(8) . . ?
O3 C3 Cr1 179.1(10) . . ?
O3 C3 Mn1 175.5(5) . . ?
Cr1 C3 Mn1 3.6(11) . . ?
O4 C4 Mn2 163.6(4) . . ?
O4 C4 Cr2 162.6(5) . . ?
Mn2 C4 Cr2 1.2(6) . . ?
O4 C4 Mn1 121.9(3) . . ?
Mn2 C4 Mn1 74.4(2) . . ?
Cr2 C4 Mn1 75.4(5) . . ?
O5 C5 Mn2 174.3(4) . . ?
O5 C5 Cr2 173.8(6) . . ?
Mn2 C5 Cr2 1.1(6) . . ?
O6 C6 Mn2 178.4(4) . . ?
O6 C6 Cr2 176.9(6) . . ?
Mn2 C6 Cr2 1.7(6) . . ?
O7 C7 Cr3 175.8(5) . . ?
O7 C7 Mn3 174.5(5) . . ?
Cr3 C7 Mn3 2.9(5) . . ?
O8 C8 Mn3 175.6(4) . . ?
O8 C8 Cr3 178.1(5) . . ?
Mn3 C8 Cr3 2.9(4) . . ?
O9 C9 Mn3 160.6(5) . . ?
O9 C9 Cr3 160.2(5) . . ?
Mn3 C9 Cr3 0.8(7) . . ?
O9 C9 Mn4 124.1(3) . . ?
Mn3 C9 Mn4 75.3(3) . . ?
Cr3 C9 Mn4 75.7(4) . . ?
O10 C10 Mn4 177.0(4) . . ?
O11 C11 Mn4 164.3(4) . . ?
O12 C12 Mn4 178.4(3) . . ?
N1 C13 H13A 109.5 . . ?
N1 C13 H13B 109.5 . . ?
H13A C13 H13B 109.5 . . ?
N1 C13 H13C 109.5 . . ?
H13A C13 H13C 109.5 . . ?
H13B C13 H13C 109.5 . . ?
N1 C14 H14A 109.5 . . ?
N1 C14 H14B 109.5 . . ?
H14A C14 H14B 109.5 . . ?
N1 C14 H14C 109.5 . . ?
H14A C14 H14C 109.5 . . ?
H14B C14 H14C 109.5 . . ?
N1 C15 H15A 109.5 . . ?
N1 C15 H15B 109.5 . . ?
H15A C15 H15B 109.5 . . ?
N1 C15 H15C 109.5 . . ?
H15A C15 H15C 109.5 . . ?
H15B C15 H15C 109.5 . . ?
C17 C16 N1 114.1(3) . . ?
C17 C16 H16A 108.7 . . ?
N1 C16 H16A 108.7 . . ?
C17 C16 H16B 108.7 . . ?
N1 C16 H16B 108.7 . . ?
H16A C16 H16B 107.6 . . ?
C18 C17 C22 118.6(4) . . ?
C18 C17 C16 120.6(4) . . ?
C22 C17 C16 120.8(4) . . ?
C17 C18 C19 120.4(4) . . ?
C17 C18 H18 119.8 . . ?
C19 C18 H18 119.8 . . ?
C20 C19 C18 120.1(4) . . ?
C20 C19 H19 119.9 . . ?
C18 C19 H19 119.9 . . ?
C21 C20 C19 119.4(4) . . ?
C21 C20 H20 120.3 . . ?
C19 C20 H20 120.3 . . ?
C20 C21 C22 121.1(4) . . ?
C20 C21 H21 119.5 . . ?
C22 C21 H21 119.5 . . ?
C21 C22 C17 120.3(4) . . ?
C21 C22 H22 119.9 . . ?
C17 C22 H22 119.9 . . ?
N2 C23 H23A 109.5 . . ?
N2 C23 H23B 109.5 . . ?
H23A C23 H23B 109.5 . . ?
N2 C23 H23C 109.5 . . ?
H23A C23 H23C 109.5 . . ?
H23B C23 H23C 109.5 . . ?
N2 C24 H24A 109.5 . . ?
N2 C24 H24B 109.5 . . ?
H24A C24 H24B 109.5 . . ?
N2 C24 H24C 109.5 . . ?
H24A C24 H24C 109.5 . . ?
H24B C24 H24C 109.5 . . ?
N2 C25 H25A 109.5 . . ?
N2 C25 H25B 109.5 . . ?
H25A C25 H25B 109.5 . . ?
N2 C25 H25C 109.5 . . ?
H25A C25 H25C 109.5 . . ?
H25B C25 H25C 109.5 . . ?
C27 C26 N2 115.1(3) . . ?
C27 C26 H26A 108.5 . . ?
N2 C26 H26A 108.5 . . ?
C27 C26 H26B 108.5 . . ?
N2 C26 H26B 108.5 . . ?
H26A C26 H26B 107.5 . . ?
C32 C27 C28 119.1(4) . . ?
C32 C27 C26 121.2(4) . . ?
C28 C27 C26 119.5(4) . . ?
C29 C28 C27 120.4(4) . . ?
C29 C28 H28 119.8 . . ?
C27 C28 H28 119.8 . . ?
C30 C29 C28 120.3(4) . . ?
C30 C29 H29 119.8 . . ?
C28 C29 H29 119.8 . . ?
C29 C30 C31 120.0(4) . . ?
C29 C30 H30 120.0 . . ?
C31 C30 H30 120.0 . . ?
C30 C31 C32 119.9(4) . . ?
C30 C31 H31 120.0 . . ?
C32 C31 H31 120.0 . . ?
C27 C32 C31 120.3(4) . . ?
C27 C32 H32 119.9 . . ?
C31 C32 H32 119.9 . . ?
N3 C33 H33A 109.5 . . ?
N3 C33 H33B 109.5 . . ?
H33A C33 H33B 109.5 . . ?
N3 C33 H33C 109.5 . . ?
H33A C33 H33C 109.5 . . ?
H33B C33 H33C 109.5 . . ?
N3 C34 H34A 109.5 . . ?
N3 C34 H34B 109.5 . . ?
H34A C34 H34B 109.5 . . ?
N3 C34 H34C 109.5 . . ?
H34A C34 H34C 109.5 . . ?
H34B C34 H34C 109.5 . . ?
N3 C35 H35A 109.5 . . ?
N3 C35 H35B 109.5 . . ?
H35A C35 H35B 109.5 . . ?
N3 C35 H35C 109.5 . . ?
H35A C35 H35C 109.5 . . ?
H35B C35 H35C 109.5 . . ?
C37 C36 N3 114.7(3) . . ?
C37 C36 H36A 108.6 . . ?
N3 C36 H36A 108.6 . . ?
C37 C36 H36B 108.6 . . ?
N3 C36 H36B 108.6 . . ?
H36A C36 H36B 107.6 . . ?
C42 C37 C38 118.7(4) . . ?
C42 C37 C36 120.7(4) . . ?
C38 C37 C36 120.5(4) . . ?
C39 C38 C37 120.1(4) . . ?
C39 C38 H38 119.9 . . ?
C37 C38 H38 119.9 . . ?
C40 C39 C38 120.5(4) . . ?
C40 C39 H39 119.8 . . ?
C38 C39 H39 119.8 . . ?
C39 C40 C41 120.1(4) . . ?
C39 C40 H40 120.0 . . ?
C41 C40 H40 120.0 . . ?
C40 C41 C42 119.8(4) . . ?
C40 C41 H41 120.1 . . ?
C42 C41 H41 120.1 . . ?
C41 C42 C37 120.8(4) . . ?
C41 C42 H42 119.6 . . ?
C37 C42 H42 119.6 . . ?
Cl1 C43 Cl1 109.1(4) . 3 ?
 
_diffrn_measured_fraction_theta_max    0.972
_diffrn_reflns_theta_full              25.68
_diffrn_measured_fraction_theta_full   0.972
_refine_diff_density_max    1.287
_refine_diff_density_min   -1.184
_refine_diff_density_rms    0.272

#=============================================END

data_3a
 
_audit_creation_method            SHELXL-97
_chemical_name_systematic
;
 ?
;
_chemical_name_common             ?
_chemical_melting_point           ?
_chemical_formula_moiety          'C91 H61 Cr2 Mn3 N2 O19 P4 S2'
_chemical_formula_sum             'C91 H61 Cr2 Mn3 N2 O19 P4 S2'
_chemical_formula_weight          1943.24
 
loop_
 _atom_type_symbol
 _atom_type_description
 _atom_type_scat_dispersion_real
 _atom_type_scat_dispersion_imag
 _atom_type_scat_source
 'C'  'C'   0.0033   0.0016
 'International Tables Vol C Tables 4.2.6.8 and 6.1.1.4'
 'H'  'H'   0.0000   0.0000
 'International Tables Vol C Tables 4.2.6.8 and 6.1.1.4'
 'N'  'N'   0.0061   0.0033
 'International Tables Vol C Tables 4.2.6.8 and 6.1.1.4'
 'O'  'O'   0.0106   0.0060
 'International Tables Vol C Tables 4.2.6.8 and 6.1.1.4'
 'P'  'P'   0.1023   0.0942
 'International Tables Vol C Tables 4.2.6.8 and 6.1.1.4'
 'S'  'S'   0.1246   0.1234
 'International Tables Vol C Tables 4.2.6.8 and 6.1.1.4'
 'Cr'  'Cr'   0.3209   0.6236
 'International Tables Vol C Tables 4.2.6.8 and 6.1.1.4'
 'Mn'  'Mn'   0.3368   0.7283
 'International Tables Vol C Tables 4.2.6.8 and 6.1.1.4'
 
_symmetry_cell_setting            triclinic
_symmetry_space_group_name_H-M    'P -1'
 
loop_
 _symmetry_equiv_pos_as_xyz
 'x, y, z'
 '-x, -y, -z'
 
_cell_length_a                    14.5057(16)
_cell_length_b                    15.0176(16)
_cell_length_c                    23.780(3)
_cell_angle_alpha                 79.726(8)
_cell_angle_beta                  83.814(7)
_cell_angle_gamma                 64.256(6)
_cell_volume                      4588.6(9)
_cell_formula_units_Z             2
_cell_measurement_temperature     298(2)
_cell_measurement_reflns_used     0
_cell_measurement_theta_min       0
_cell_measurement_theta_max       0
 
_exptl_crystal_description        prism
_exptl_crystal_colour             red
_exptl_crystal_size_max           0.40
_exptl_crystal_size_mid           0.34
_exptl_crystal_size_min           0.16
_exptl_crystal_density_meas       ?
_exptl_crystal_density_diffrn     1.406
_exptl_crystal_density_method     'not measured'
_exptl_crystal_F_000              1976
_exptl_absorpt_coefficient_mu     0.814
_exptl_absorpt_correction_type    multi-scan
_exptl_absorpt_correction_T_min   0.7367
_exptl_absorpt_correction_T_max   0.8809
_exptl_absorpt_process_details    ?
 
_exptl_special_details
;
 ?
;
 
_diffrn_ambient_temperature       298(2)
_diffrn_radiation_wavelength      0.71073
_diffrn_radiation_type            MoK\a
_diffrn_radiation_source          'fine-focus sealed tube'
_diffrn_radiation_monochromator   graphite
_diffrn_measurement_device_type   ?
_diffrn_measurement_method        ?
_diffrn_detector_area_resol_mean  ?
_diffrn_standards_number          ?
_diffrn_standards_interval_count  ?
_diffrn_standards_interval_time   ?
_diffrn_standards_decay_%         ?
_diffrn_reflns_number             24487
_diffrn_reflns_av_R_equivalents   0.0778
_diffrn_reflns_av_sigmaI/netI     0.2576
_diffrn_reflns_limit_h_min        -16
_diffrn_reflns_limit_h_max        17
_diffrn_reflns_limit_k_min        -13
_diffrn_reflns_limit_k_max        17
_diffrn_reflns_limit_l_min        -27
_diffrn_reflns_limit_l_max        26
_diffrn_reflns_theta_min          1.64
_diffrn_reflns_theta_max          25.01
_reflns_number_total              15390
_reflns_number_gt                 5514
_reflns_threshold_expression      >2sigma(I)
 
_computing_data_collection        ?
_computing_cell_refinement        ?
_computing_data_reduction         ?
_computing_structure_solution     'SHELXS-86 (Sheldrick, 1986)'
_computing_structure_refinement   'SHELXL-97 (Sheldrick, 1997)'
_computing_molecular_graphics     'Ortep-3 for Windows (Farrugia, 1997)'
_computing_publication_material   'WinGX publication routines (Farrugia, 1999)'
 
_refine_special_details
;
 Refinement of F^2^ against ALL reflections.  The weighted R-factor wR and
 goodness of fit S are based on F^2^, conventional R-factors R are based
 on F, with F set to zero for negative F^2^. The threshold expression of
 F^2^ > 2sigma(F^2^) is used only for calculating R-factors(gt) etc. and is
 not relevant to the choice of reflections for refinement.  R-factors based
 on F^2^ are statistically about twice as large as those based on F, and R-
 factors based on ALL data will be even larger.
;
 
_refine_ls_structure_factor_coef  Fsqd
_refine_ls_matrix_type            full
_refine_ls_weighting_scheme       calc
_refine_ls_weighting_details
 'calc w=1/[\s^2^(Fo^2^)+(0.1171P)^2^+56.3114P] where P=(Fo^2^+2Fc^2^)/3'
_atom_sites_solution_primary      direct
_atom_sites_solution_secondary    difmap
_atom_sites_solution_hydrogens    geom
_refine_ls_hydrogen_treatment     constr
_refine_ls_extinction_method      none
_refine_ls_extinction_coef        ?
_refine_ls_number_reflns          15390
_refine_ls_number_parameters      1099
_refine_ls_number_restraints      0
_refine_ls_R_factor_all           0.2791
_refine_ls_R_factor_gt            0.1211
_refine_ls_wR_factor_ref          0.3845
_refine_ls_wR_factor_gt           0.2948
_refine_ls_goodness_of_fit_ref    1.043
_refine_ls_restrained_S_all       1.043
_refine_ls_shift/su_max           0.000
_refine_ls_shift/su_mean          0.000
 
loop_
 _atom_site_label
 _atom_site_type_symbol
 _atom_site_fract_x
 _atom_site_fract_y
 _atom_site_fract_z
 _atom_site_U_iso_or_equiv
 _atom_site_adp_type
 _atom_site_occupancy
 _atom_site_symmetry_multiplicity
 _atom_site_calc_flag
 _atom_site_refinement_flags
 _atom_site_disorder_assembly
 _atom_site_disorder_group
C1 C 1.2132(19) 0.4415(19) 0.3421(13) 0.102(10) Uani 1 1 d . A .
C2 C 1.2247(14) 0.5874(17) 0.2558(10) 0.088(7) Uani 1 1 d . A .
C3 C 1.376(4) 0.412(3) 0.296(2) 0.085(15) Uiso 0.50 1 d P A 1
O3 O 1.459(2) 0.407(2) 0.3048(15) 0.088(9) Uiso 0.50 1 d P A 1
C3A C 1.390(3) 0.434(3) 0.2667(18) 0.052(10) Uiso 0.50 1 d P A 2
O3A O 1.473(2) 0.424(2) 0.2686(15) 0.096(10) Uiso 0.50 1 d P A 2
C4 C 1.289(2) 0.444(2) 0.1981(17) 0.042(9) Uiso 0.55 1 d P A 5
O4 O 1.318(3) 0.430(3) 0.1496(17) 0.100(13) Uiso 0.55 1 d P A 5
C4A C 1.296(3) 0.462(3) 0.170(2) 0.041(11) Uiso 0.45 1 d P A 6
O4A O 1.303(3) 0.463(3) 0.1240(16) 0.079(11) Uiso 0.45 1 d P A 6
C5 C 1.287(3) 0.310(3) 0.2838(16) 0.055(10) Uiso 0.55 1 d P A 7
O5 O 1.317(2) 0.222(2) 0.2942(12) 0.081(8) Uiso 0.55 1 d P A 7
C5A C 1.307(3) 0.318(3) 0.253(2) 0.059(12) Uiso 0.45 1 d P A 8
O5A O 1.342(2) 0.228(3) 0.2600(16) 0.087(10) Uiso 0.45 1 d P A 8
C6 C 1.0581(14) 0.5089(14) 0.1125(10) 0.070(6) Uani 1 1 d . A .
C7 C 1.1365(12) 0.3323(12) 0.1633(8) 0.063(5) Uani 1 1 d . A .
C8 C 0.9578(12) 0.4009(11) 0.1283(9) 0.060(5) Uani 1 1 d . A .
C9 C 1.0515(13) 0.3264(13) 0.3193(9) 0.078(6) Uani 1 1 d . . .
C10 C 0.8656(15) 0.3887(15) 0.2943(10) 0.079(6) Uani 1 1 d . . .
C11 C 0.9135(16) 0.4908(15) 0.3450(10) 0.075(6) Uani 1 1 d . . .
C12 C 0.8130(12) 0.7082(12) 0.2936(9) 0.066(6) Uani 1 1 d . A .
C13 C 0.9441(13) 0.7292(12) 0.2197(9) 0.060(5) Uani 1 1 d . A .
C14 C 0.9923(14) 0.6523(14) 0.3209(10) 0.072(6) Uani 1 1 d . A .
C15 C 0.6612(18) 0.6133(15) 0.2584(13) 0.090(8) Uani 1 1 d . B .
C16 C 0.6734(12) 0.7483(13) 0.1773(9) 0.070(6) Uani 1 1 d . B .
C17A C 0.564(3) 0.643(3) 0.1827(19) 0.036(11) Uiso 0.40 1 d P B 3
O17A O 0.477(2) 0.6623(19) 0.1688(14) 0.049(8) Uiso 0.40 1 d P B 3
C17 C 0.5723(19) 0.6511(17) 0.1529(13) 0.030(7) Uiso 0.60 1 d P B 4
O17 O 0.4918(16) 0.6742(14) 0.1358(10) 0.061(6) Uiso 0.60 1 d P B 4
C18 C 0.7395(14) 0.6120(11) 0.1058(10) 0.062(6) Uani 1 1 d . B .
C19 C 0.7121(11) 0.4850(13) 0.1881(8) 0.058(5) Uani 1 1 d . B .
C20 C 0.4268(18) 0.8374(19) 0.4787(11) 0.097(8) Uani 1 1 d . . .
C21 C 0.460(2) 0.822(3) 0.5326(12) 0.150(12) Uani 1 1 d . . .
H21 H 0.4148 0.8539 0.5609 0.180 Uiso 1 1 calc R . .
C22 C 0.564(2) 0.757(3) 0.5465(16) 0.170(15) Uani 1 1 d . . .
H22 H 0.5864 0.7383 0.5838 0.205 Uiso 1 1 calc R . .
C23 C 0.626(3) 0.727(3) 0.5029(16) 0.177(16) Uani 1 1 d . . .
H23 H 0.6955 0.6943 0.5096 0.213 Uiso 1 1 calc R . .
C24 C 0.598(2) 0.739(3) 0.4493(15) 0.165(15) Uani 1 1 d . . .
H24 H 0.6448 0.7074 0.4213 0.198 Uiso 1 1 calc R . .
C25 C 0.492(2) 0.802(2) 0.4366(12) 0.134(11) Uani 1 1 d . . .
H25 H 0.4700 0.8176 0.3993 0.160 Uiso 1 1 calc R . .
C26 C 0.2370(16) 1.0232(16) 0.4914(10) 0.077(6) Uani 1 1 d . . .
C27 C 0.212(2) 1.0260(19) 0.5488(11) 0.107(8) Uani 1 1 d . . .
H27 H 0.2210 0.9682 0.5740 0.128 Uiso 1 1 calc R . .
C28 C 0.175(3) 1.117(3) 0.5676(12) 0.139(12) Uani 1 1 d . . .
H28 H 0.1574 1.1193 0.6063 0.167 Uiso 1 1 calc R . .
C29 C 0.161(2) 1.203(2) 0.5331(14) 0.134(11) Uani 1 1 d . . .
H29 H 0.1367 1.2623 0.5484 0.161 Uiso 1 1 calc R . .
C30 C 0.183(2) 1.2031(18) 0.4763(14) 0.115(9) Uani 1 1 d . . .
H30 H 0.1697 1.2629 0.4521 0.138 Uiso 1 1 calc R . .
C31 C 0.2248(16) 1.1137(17) 0.4544(10) 0.086(7) Uani 1 1 d . . .
H31 H 0.2450 1.1124 0.4160 0.103 Uiso 1 1 calc R . .
C32 C 0.2271(15) 0.8339(14) 0.5018(8) 0.063(5) Uani 1 1 d . . .
C33 C 0.2784(19) 0.7388(19) 0.5278(10) 0.094(7) Uani 1 1 d . . .
H33 H 0.3494 0.7118 0.5291 0.113 Uiso 1 1 calc R . .
C34 C 0.229(2) 0.6819(19) 0.5518(12) 0.120(10) Uani 1 1 d . . .
H34 H 0.2661 0.6171 0.5696 0.144 Uiso 1 1 calc R . .
C35 C 0.126(2) 0.719(2) 0.5498(11) 0.106(9) Uani 1 1 d . . .
H35 H 0.0921 0.6799 0.5657 0.127 Uiso 1 1 calc R . .
C36 C 0.0708(19) 0.817(2) 0.5238(11) 0.102(8) Uani 1 1 d . . .
H36 H -0.0002 0.8441 0.5223 0.123 Uiso 1 1 calc R . .
C37 C 0.1221(16) 0.8720(15) 0.5008(9) 0.079(6) Uani 1 1 d . . .
H37 H 0.0854 0.9375 0.4838 0.095 Uiso 1 1 calc R . .
C38 C 0.1114(13) 0.9367(14) 0.3383(8) 0.063(5) Uani 1 1 d . . .
C39 C 0.0547(14) 1.0296(13) 0.3555(8) 0.076(6) Uani 1 1 d . . .
H39 H 0.0840 1.0594 0.3745 0.091 Uiso 1 1 calc R . .
C40 C -0.0523(15) 1.0774(13) 0.3424(9) 0.078(6) Uani 1 1 d . . .
H40 H -0.0935 1.1404 0.3523 0.094 Uiso 1 1 calc R . .
C41 C -0.0928(15) 1.0315(17) 0.3159(9) 0.084(7) Uani 1 1 d . . .
H41 H -0.1622 1.0634 0.3083 0.100 Uiso 1 1 calc R . .
C42 C -0.0355(15) 0.9394(16) 0.2997(9) 0.078(6) Uani 1 1 d . . .
H42 H -0.0648 0.9077 0.2822 0.094 Uiso 1 1 calc R . .
C43 C 0.0652(14) 0.8967(14) 0.3103(8) 0.071(6) Uani 1 1 d . . .
H43 H 0.1057 0.8359 0.2975 0.085 Uiso 1 1 calc R . .
C44 C 0.2890(14) 0.7492(12) 0.3678(9) 0.068(6) Uani 1 1 d . . .
C45 C 0.2250(16) 0.7090(13) 0.3962(8) 0.070(6) Uani 1 1 d . . .
H45 H 0.1566 0.7500 0.4036 0.083 Uiso 1 1 calc R . .
C46 C 0.264(2) 0.6067(17) 0.4138(10) 0.100(8) Uani 1 1 d . . .
H46 H 0.2208 0.5799 0.4342 0.120 Uiso 1 1 calc R . .
C47 C 0.362(2) 0.5447(18) 0.4020(12) 0.112(9) Uani 1 1 d . . .
H47 H 0.3850 0.4763 0.4139 0.134 Uiso 1 1 calc R . .
C48 C 0.4268(16) 0.5816(15) 0.3729(12) 0.110(9) Uani 1 1 d . . .
H48 H 0.4943 0.5395 0.3644 0.132 Uiso 1 1 calc R . .
C49 C 0.3885(14) 0.6859(13) 0.3562(10) 0.097(8) Uani 1 1 d . . .
H49 H 0.4320 0.7125 0.3367 0.117 Uiso 1 1 calc R . .
C50 C 0.3062(12) 0.9084(12) 0.2838(8) 0.053(5) Uani 1 1 d . . .
C51 C 0.3182(13) 0.8606(13) 0.2386(10) 0.065(5) Uani 1 1 d . . .
H51 H 0.2999 0.8074 0.2434 0.079 Uiso 1 1 calc R . .
C52 C 0.3553(14) 0.8862(15) 0.1869(10) 0.073(6) Uani 1 1 d . . .
H52 H 0.3598 0.8527 0.1567 0.088 Uiso 1 1 calc R . .
C53 C 0.3868(14) 0.9626(16) 0.1790(10) 0.081(6) Uani 1 1 d . . .
H53 H 0.4159 0.9786 0.1440 0.097 Uiso 1 1 calc R . .
C54 C 0.3747(16) 1.0135(16) 0.2225(11) 0.083(6) Uani 1 1 d . . .
H54 H 0.3920 1.0674 0.2169 0.100 Uiso 1 1 calc R . .
C55 C 0.3371(13) 0.9865(13) 0.2751(10) 0.069(6) Uani 1 1 d . . .
H55 H 0.3320 1.0205 0.3052 0.083 Uiso 1 1 calc R . .
C56 C 0.6858(12) 0.1305(12) 0.2045(7) 0.053(5) Uani 1 1 d . . .
C57 C 0.6541(13) 0.1973(12) 0.2456(9) 0.060(5) Uani 1 1 d . . .
H57 H 0.6632 0.2559 0.2370 0.072 Uiso 1 1 calc R . .
C58 C 0.6106(15) 0.1774(19) 0.2975(10) 0.090(7) Uani 1 1 d . . .
H58 H 0.5893 0.2234 0.3230 0.109 Uiso 1 1 calc R . .
C59 C 0.5982(15) 0.092(2) 0.3120(10) 0.084(7) Uani 1 1 d . . .
H59 H 0.5694 0.0789 0.3476 0.101 Uiso 1 1 calc R . .
C60 C 0.6287(17) 0.0233(16) 0.2736(11) 0.088(7) Uani 1 1 d . . .
H60 H 0.6195 -0.0352 0.2832 0.105 Uiso 1 1 calc R . .
C61 C 0.6724(13) 0.0426(14) 0.2214(9) 0.065(5) Uani 1 1 d . . .
H61 H 0.6937 -0.0043 0.1964 0.078 Uiso 1 1 calc R . .
C62 C 0.6958(11) 0.2739(11) 0.1066(8) 0.049(4) Uani 1 1 d . . .
C63 C 0.5907(12) 0.3311(12) 0.1134(8) 0.065(5) Uani 1 1 d . . .
H63 H 0.5502 0.3047 0.1368 0.078 Uiso 1 1 calc R . .
C64 C 0.5464(15) 0.4306(13) 0.0839(10) 0.083(7) Uani 1 1 d . . .
H64 H 0.4768 0.4708 0.0882 0.099 Uiso 1 1 calc R . .
C65 C 0.6078(16) 0.4656(14) 0.0493(10) 0.081(6) Uani 1 1 d . . .
H65 H 0.5787 0.5309 0.0304 0.097 Uiso 1 1 calc R . .
C66 C 0.7122(15) 0.4085(12) 0.0407(8) 0.066(5) Uani 1 1 d . . .
H66 H 0.7527 0.4336 0.0163 0.079 Uiso 1 1 calc R . .
C67 C 0.7530(13) 0.3118(11) 0.0707(8) 0.057(5) Uani 1 1 d . . .
H67 H 0.8225 0.2717 0.0659 0.068 Uiso 1 1 calc R . .
C68 C 0.8816(10) 0.1132(10) 0.1543(7) 0.040(4) Uani 1 1 d . . .
C69 C 0.9047(11) 0.1762(11) 0.1812(7) 0.055(5) Uani 1 1 d . . .
H69 H 0.8529 0.2365 0.1896 0.066 Uiso 1 1 calc R . .
C70 C 1.0031(12) 0.1495(13) 0.1952(8) 0.063(5) Uani 1 1 d . . .
H70 H 1.0188 0.1928 0.2116 0.076 Uiso 1 1 calc R . .
C71 C 1.0773(13) 0.0606(14) 0.1853(8) 0.066(5) Uani 1 1 d . . .
H71 H 1.1438 0.0424 0.1956 0.080 Uiso 1 1 calc R . .
C72 C 1.0570(13) -0.0026(12) 0.1607(8) 0.067(6) Uani 1 1 d . . .
H72 H 1.1098 -0.0636 0.1542 0.080 Uiso 1 1 calc R . .
C73 C 0.9575(11) 0.0218(10) 0.1445(7) 0.054(5) Uani 1 1 d . . .
H73 H 0.9434 -0.0222 0.1279 0.065 Uiso 1 1 calc R . .
C74 C 0.7652(10) 0.1477(10) -0.0146(7) 0.044(4) Uani 1 1 d . . .
C75 C 0.8697(11) 0.1299(12) -0.0183(8) 0.056(3) Uani 1 1 d . . .
H75 H 0.9161 0.0787 0.0065 0.068 Uiso 1 1 calc R . .
C76 C 0.9012(13) 0.1869(13) -0.0576(9) 0.072(6) Uani 1 1 d . . .
H76 H 0.9707 0.1722 -0.0611 0.086 Uiso 1 1 calc R . .
C77 C 0.8352(16) 0.2661(15) -0.0931(9) 0.075(6) Uani 1 1 d . . .
H77 H 0.8585 0.3065 -0.1192 0.090 Uiso 1 1 calc R . .
C78 C 0.7356(15) 0.2839(14) -0.0891(9) 0.079(6) Uani 1 1 d . . .
H78 H 0.6902 0.3376 -0.1131 0.095 Uiso 1 1 calc R . .
C79 C 0.6982(11) 0.2267(12) -0.0512(8) 0.056(3) Uani 1 1 d . . .
H79 H 0.6291 0.2405 -0.0501 0.068 Uiso 1 1 calc R . .
C80 C 0.7954(9) -0.0573(10) 0.0228(7) 0.034(4) Uani 1 1 d . . .
C81 C 0.8160(10) -0.1333(11) 0.0688(8) 0.047(4) Uani 1 1 d . . .
H81 H 0.7967 -0.1195 0.1059 0.057 Uiso 1 1 calc R . .
C82 C 0.8678(10) -0.2334(11) 0.0571(9) 0.053(5) Uani 1 1 d . . .
H82 H 0.8819 -0.2864 0.0868 0.064 Uiso 1 1 calc R . .
C83 C 0.8971(13) -0.2518(14) 0.0017(10) 0.064(5) Uani 1 1 d . . .
H83 H 0.9298 -0.3175 -0.0056 0.077 Uiso 1 1 calc R . .
C84 C 0.8793(12) -0.1761(13) -0.0423(9) 0.064(5) Uani 1 1 d . . .
H84 H 0.9012 -0.1901 -0.0793 0.077 Uiso 1 1 calc R . .
C85 C 0.8285(11) -0.0776(12) -0.0325(8) 0.052(5) Uani 1 1 d . . .
H85 H 0.8166 -0.0255 -0.0627 0.062 Uiso 1 1 calc R . .
C86 C 0.5914(10) 0.1047(10) 0.0284(8) 0.043(4) Uani 1 1 d . . .
C87 C 0.5235(11) 0.1400(13) 0.0734(9) 0.075(6) Uani 1 1 d . . .
H87 H 0.5467 0.1401 0.1084 0.089 Uiso 1 1 calc R . .
C88 C 0.4181(16) 0.1758(17) 0.0645(13) 0.102(8) Uani 1 1 d . . .
H88 H 0.3701 0.2040 0.0929 0.122 Uiso 1 1 calc R . .
C89 C 0.3875(17) 0.1691(15) 0.0150(14) 0.100(9) Uani 1 1 d . . .
H89 H 0.3178 0.1924 0.0097 0.120 Uiso 1 1 calc R . .
C90 C 0.4546(17) 0.1295(17) -0.0276(12) 0.096(8) Uani 1 1 d . . .
H90 H 0.4318 0.1223 -0.0608 0.115 Uiso 1 1 calc R . .
C91 C 0.5598(15) 0.0992(14) -0.0208(9) 0.076(6) Uani 1 1 d . . .
H91 H 0.6067 0.0755 -0.0505 0.091 Uiso 1 1 calc R . .
Cr1 Cr 1.2561(2) 0.4488(2) 0.26377(18) 0.0823(13) Uani 1 1 d . . .
Cr2 Cr 0.69730(18) 0.61505(17) 0.18226(14) 0.0571(9) Uani 1 1 d . . .
Mn1 Mn 1.02376(16) 0.44145(16) 0.17069(12) 0.0499(8) Uani 1 1 d . . .
H1' H 1.0027 0.3834 0.2188 0.075 Uiso 1 1 d R A .
Mn2 Mn 0.9599(2) 0.43593(18) 0.28176(13) 0.0591(8) Uani 1 1 d . A .
Mn3 Mn 0.93556(17) 0.62929(16) 0.26570(12) 0.0515(8) Uani 1 1 d . . .
N1 N 0.2722(11) 0.9291(10) 0.3969(6) 0.068(4) Uani 1 1 d . . .
N2 N 0.7480(10) 0.0683(8) 0.1014(6) 0.049(4) Uani 1 1 d . . .
O1 O 1.1880(17) 0.4314(14) 0.3882(9) 0.124(8) Uani 1 1 d . . .
O2 O 1.2092(11) 0.6690(10) 0.2507(7) 0.096(5) Uani 1 1 d . . .
O6 O 1.0868(10) 0.5503(10) 0.0711(7) 0.093(5) Uani 1 1 d . . .
O7 O 1.2105(9) 0.2596(9) 0.1585(7) 0.099(5) Uani 1 1 d . . .
O8 O 0.9231(9) 0.3758(9) 0.0971(6) 0.077(4) Uani 1 1 d . . .
O9 O 1.1148(14) 0.2532(10) 0.3414(8) 0.143(7) Uani 1 1 d . . .
O10 O 0.8064(12) 0.3557(12) 0.3052(7) 0.105(5) Uani 1 1 d . . .
O11 O 0.8878(16) 0.5108(12) 0.3910(7) 0.127(7) Uani 1 1 d . . .
O12 O 0.7363(11) 0.7607(10) 0.3128(7) 0.103(5) Uani 1 1 d . . .
O13 O 0.9499(11) 0.7956(10) 0.1877(6) 0.096(5) Uani 1 1 d . . .
O14 O 1.0254(12) 0.6694(11) 0.3579(7) 0.102(5) Uani 1 1 d . . .
O15 O 0.6355(14) 0.6101(14) 0.3064(9) 0.123(7) Uani 1 1 d . . .
O16 O 0.6549(10) 0.8326(9) 0.1745(7) 0.095(5) Uani 1 1 d . . .
O18 O 0.7639(13) 0.6079(10) 0.0572(7) 0.095(5) Uani 1 1 d . . .
O19 O 0.7124(10) 0.4073(9) 0.1929(6) 0.088(4) Uani 1 1 d . . .
P1 P 0.2896(4) 0.9071(4) 0.4631(2) 0.0698(15) Uani 1 1 d . . .
P2 P 0.2470(3) 0.8817(3) 0.3503(2) 0.0573(13) Uani 1 1 d . . .
P3 P 0.7513(3) 0.1448(3) 0.1389(2) 0.0473(12) Uani 1 1 d . . .
P4 P 0.7263(3) 0.0693(3) 0.0381(2) 0.0431(12) Uani 1 1 d . . .
S1 S 1.0787(3) 0.4950(3) 0.2396(2) 0.0530(12) Uani 1 1 d . A .
S2 S 0.8746(3) 0.5615(3) 0.20736(19) 0.0436(11) Uani 1 1 d . A .
 
loop_
 _atom_site_aniso_label
 _atom_site_aniso_U_11
 _atom_site_aniso_U_22
 _atom_site_aniso_U_33
 _atom_site_aniso_U_23
 _atom_site_aniso_U_13
 _atom_site_aniso_U_12
C1 0.073(17) 0.062(15) 0.14(3) 0.021(19) -0.056(19) -0.002(12)
C2 0.044(12) 0.070(14) 0.14(2) -0.031(15) -0.033(12) 0.003(11)
C6 0.042(11) 0.054(12) 0.098(18) -0.012(12) 0.001(11) -0.004(9)
C7 0.033(9) 0.039(10) 0.102(16) -0.006(10) -0.026(10) 0.003(8)
C8 0.034(10) 0.031(9) 0.115(18) -0.013(10) -0.011(10) -0.011(8)
C9 0.033(10) 0.049(11) 0.137(19) 0.012(12) -0.032(11) -0.007(9)
C10 0.051(13) 0.082(15) 0.108(19) -0.016(13) -0.010(12) -0.031(11)
C11 0.075(14) 0.068(14) 0.063(15) 0.001(12) -0.008(12) -0.014(11)
C12 0.023(9) 0.052(11) 0.118(17) -0.032(11) 0.017(10) -0.007(8)
C13 0.058(11) 0.024(9) 0.094(16) -0.008(10) -0.010(10) -0.010(8)
C14 0.049(12) 0.051(12) 0.095(18) -0.007(12) -0.010(12) -0.001(9)
C15 0.074(16) 0.048(12) 0.15(3) -0.028(16) -0.005(17) -0.027(11)
C16 0.034(10) 0.041(10) 0.123(18) -0.015(11) -0.014(10) -0.001(8)
C18 0.068(13) 0.020(8) 0.101(18) 0.004(11) -0.051(13) -0.016(8)
C19 0.028(9) 0.047(11) 0.094(15) -0.004(10) -0.007(9) -0.013(8)
C20 0.082(17) 0.14(2) 0.063(17) -0.024(15) -0.015(14) -0.040(16)
C21 0.11(2) 0.24(4) 0.11(2) -0.08(2) -0.029(18) -0.05(2)
C22 0.08(2) 0.26(4) 0.13(3) 0.01(3) -0.04(2) -0.04(3)
C23 0.10(3) 0.29(5) 0.12(3) -0.01(3) -0.03(2) -0.06(3)
C24 0.067(19) 0.29(4) 0.12(3) -0.07(3) 0.012(18) -0.05(2)
C25 0.08(2) 0.24(4) 0.11(2) -0.05(2) -0.016(17) -0.08(2)
C26 0.096(16) 0.089(16) 0.060(15) -0.016(13) 0.002(12) -0.052(13)
C27 0.16(3) 0.097(19) 0.08(2) -0.020(15) 0.015(17) -0.071(18)
C28 0.22(4) 0.13(3) 0.09(2) -0.02(2) 0.01(2) -0.11(3)
C29 0.21(3) 0.12(3) 0.11(2) -0.05(2) 0.02(2) -0.10(2)
C30 0.15(3) 0.070(16) 0.13(3) -0.026(17) -0.01(2) -0.050(16)
C31 0.090(16) 0.093(17) 0.102(18) -0.007(16) -0.011(14) -0.063(14)
C32 0.064(13) 0.049(11) 0.064(14) 0.007(10) -0.001(10) -0.018(10)
C33 0.098(18) 0.11(2) 0.097(19) 0.003(15) -0.008(15) -0.066(17)
C34 0.12(2) 0.075(17) 0.13(2) -0.005(16) 0.00(2) -0.011(18)
C35 0.13(2) 0.080(18) 0.11(2) -0.007(16) 0.037(19) -0.057(18)
C36 0.087(18) 0.11(2) 0.13(2) -0.037(17) 0.031(16) -0.058(17)
C37 0.071(15) 0.057(12) 0.103(18) -0.009(12) -0.004(13) -0.022(12)
C38 0.039(10) 0.068(13) 0.066(14) 0.005(11) -0.008(9) -0.013(9)
C39 0.067(13) 0.055(12) 0.077(15) -0.006(11) -0.019(11) 0.002(10)
C40 0.065(14) 0.036(10) 0.095(17) 0.001(11) -0.006(12) 0.012(10)
C41 0.048(12) 0.091(17) 0.095(18) 0.004(14) -0.016(12) -0.017(12)
C42 0.059(13) 0.089(16) 0.095(17) -0.018(13) -0.016(12) -0.034(12)
C43 0.053(12) 0.074(13) 0.083(16) -0.008(11) -0.016(11) -0.021(11)
C44 0.062(13) 0.033(10) 0.097(16) 0.003(10) -0.025(11) -0.008(9)
C45 0.081(14) 0.047(12) 0.080(15) 0.002(11) -0.020(12) -0.027(11)
C46 0.12(2) 0.080(17) 0.11(2) 0.011(15) -0.023(17) -0.061(17)
C47 0.081(18) 0.069(16) 0.17(3) 0.018(16) -0.058(18) -0.022(15)
C48 0.048(13) 0.061(14) 0.22(3) -0.003(16) -0.039(16) -0.020(11)
C49 0.041(11) 0.045(12) 0.17(2) 0.000(13) -0.023(13) 0.012(9)
C50 0.042(10) 0.044(10) 0.057(13) -0.009(9) -0.015(9) 0.002(8)
C51 0.052(12) 0.057(12) 0.079(16) -0.005(12) -0.003(11) -0.017(10)
C52 0.062(13) 0.060(13) 0.081(17) -0.018(12) -0.001(12) -0.008(10)
C53 0.056(13) 0.069(14) 0.101(19) -0.018(14) 0.014(12) -0.013(11)
C54 0.078(15) 0.076(15) 0.097(19) 0.000(14) 0.008(14) -0.041(13)
C55 0.049(11) 0.060(12) 0.102(18) -0.010(12) -0.005(11) -0.028(10)
C56 0.035(9) 0.049(10) 0.056(12) -0.003(10) -0.017(8) 0.001(8)
C57 0.056(11) 0.037(10) 0.074(15) -0.007(10) -0.010(11) -0.007(9)
C58 0.059(14) 0.095(19) 0.077(19) -0.001(14) 0.002(12) -0.001(13)
C59 0.063(14) 0.098(18) 0.070(17) 0.007(15) 0.007(12) -0.024(13)
C60 0.098(18) 0.069(14) 0.091(19) -0.002(14) 0.009(15) -0.037(13)
C61 0.043(11) 0.074(14) 0.076(16) -0.010(12) -0.005(10) -0.023(10)
C62 0.034(9) 0.033(9) 0.078(13) -0.009(9) -0.010(9) -0.010(8)
C63 0.030(9) 0.044(10) 0.106(16) 0.002(10) -0.015(10) -0.003(8)
C64 0.046(12) 0.042(11) 0.14(2) 0.006(12) -0.031(12) 0.001(9)
C65 0.068(14) 0.046(11) 0.119(19) 0.011(12) -0.045(13) -0.014(11)
C66 0.074(14) 0.033(9) 0.093(15) 0.007(10) -0.033(11) -0.024(9)
C67 0.053(11) 0.030(9) 0.085(14) -0.007(9) -0.018(10) -0.013(8)
C68 0.017(7) 0.032(8) 0.070(12) -0.001(8) -0.006(7) -0.009(6)
C69 0.025(9) 0.040(9) 0.094(14) -0.011(9) -0.007(9) -0.007(7)
C70 0.033(10) 0.058(12) 0.101(16) 0.000(11) -0.014(10) -0.024(9)
C71 0.044(11) 0.065(13) 0.079(15) 0.013(11) -0.028(10) -0.017(10)
C72 0.042(11) 0.032(9) 0.110(17) 0.000(10) -0.007(11) -0.003(8)
C73 0.035(9) 0.025(8) 0.088(14) -0.006(8) -0.010(9) 0.002(7)
C74 0.026(8) 0.028(8) 0.072(12) -0.007(8) -0.010(8) -0.004(7)
C75 0.022(6) 0.053(7) 0.103(11) -0.008(7) 0.001(6) -0.026(6)
C76 0.028(9) 0.056(12) 0.129(19) -0.023(12) 0.004(11) -0.014(9)
C77 0.068(14) 0.067(13) 0.103(17) -0.002(12) 0.008(13) -0.047(12)
C78 0.056(13) 0.065(13) 0.098(17) 0.011(12) -0.028(12) -0.012(11)
C79 0.022(6) 0.053(7) 0.103(11) -0.008(7) 0.001(6) -0.026(6)
C80 0.009(7) 0.031(8) 0.060(12) -0.002(8) -0.007(7) -0.006(6)
C81 0.019(8) 0.035(9) 0.088(14) -0.003(9) -0.009(8) -0.011(7)
C82 0.020(8) 0.036(9) 0.103(16) 0.009(10) -0.021(9) -0.013(7)
C83 0.041(10) 0.056(12) 0.095(17) -0.032(13) -0.006(11) -0.010(9)
C84 0.047(11) 0.052(11) 0.074(15) -0.024(11) 0.003(10) 0.001(9)
C85 0.038(9) 0.048(10) 0.070(14) -0.008(9) -0.007(9) -0.016(8)
C86 0.018(8) 0.033(8) 0.074(13) 0.011(9) -0.005(9) -0.015(7)
C87 0.016(9) 0.085(14) 0.124(18) -0.026(13) 0.005(10) -0.021(9)
C88 0.041(13) 0.097(17) 0.17(3) -0.043(18) 0.000(15) -0.020(12)
C89 0.042(13) 0.061(14) 0.18(3) 0.006(17) -0.028(17) -0.010(11)
C90 0.060(14) 0.097(17) 0.15(2) 0.020(16) -0.038(15) -0.055(14)
C91 0.062(14) 0.082(14) 0.076(16) 0.002(12) -0.017(12) -0.025(11)
Cr1 0.0332(16) 0.0410(17) 0.166(4) -0.026(2) -0.038(2) 0.0026(13)
Cr2 0.0215(13) 0.0310(14) 0.113(3) -0.0137(15) -0.0145(15) -0.0016(11)
Mn1 0.0184(12) 0.0312(13) 0.091(2) -0.0118(13) -0.0100(12) 0.0002(10)
Mn2 0.0473(16) 0.0379(14) 0.086(2) -0.0003(14) -0.0193(15) -0.0120(12)
Mn3 0.0296(13) 0.0331(13) 0.084(2) -0.0096(13) -0.0120(13) -0.0036(11)
N1 0.079(11) 0.051(9) 0.060(11) -0.010(8) -0.016(8) -0.012(8)
N2 0.065(9) 0.016(6) 0.061(10) -0.006(6) -0.016(7) -0.009(6)
O1 0.153(18) 0.099(13) 0.140(18) 0.014(14) -0.077(16) -0.068(13)
O2 0.082(10) 0.058(9) 0.151(15) -0.019(10) -0.014(9) -0.030(8)
O6 0.061(9) 0.075(10) 0.121(14) 0.002(9) -0.005(9) -0.013(8)
O7 0.049(8) 0.051(8) 0.169(15) -0.037(9) -0.012(9) 0.014(7)
O8 0.049(8) 0.061(8) 0.118(12) -0.036(8) -0.021(8) -0.006(6)
O9 0.156(16) 0.045(9) 0.187(18) 0.042(10) -0.099(14) -0.006(10)
O10 0.082(11) 0.124(13) 0.112(13) 0.016(10) -0.020(9) -0.055(10)
O11 0.20(2) 0.094(12) 0.082(13) -0.015(10) 0.002(13) -0.055(12)
O12 0.064(10) 0.078(10) 0.156(15) -0.046(10) 0.009(10) -0.012(8)
O13 0.114(12) 0.064(9) 0.114(13) 0.001(9) -0.014(10) -0.046(9)
O14 0.100(12) 0.088(11) 0.115(14) -0.029(10) -0.029(10) -0.027(9)
O15 0.106(14) 0.130(15) 0.147(18) -0.052(14) 0.037(13) -0.060(12)
O16 0.077(10) 0.046(8) 0.145(14) -0.011(9) -0.013(9) -0.011(7)
O18 0.122(13) 0.059(9) 0.095(12) 0.003(9) -0.025(11) -0.030(9)
O19 0.089(10) 0.043(8) 0.127(13) -0.015(8) -0.013(9) -0.019(7)
P1 0.065(3) 0.076(4) 0.068(4) -0.008(3) -0.014(3) -0.028(3)
P2 0.044(3) 0.051(3) 0.072(4) -0.002(3) -0.015(2) -0.014(2)
P3 0.026(2) 0.030(2) 0.077(4) -0.003(2) -0.013(2) -0.0030(17)
P4 0.019(2) 0.031(2) 0.074(3) -0.005(2) -0.010(2) -0.0051(17)
S1 0.034(2) 0.034(2) 0.083(4) -0.012(2) -0.020(2) -0.0016(18)
S2 0.0167(18) 0.029(2) 0.079(3) -0.010(2) -0.0060(19) -0.0023(15)
 
_geom_special_details
;
 All esds (except the esd in the dihedral angle between two l.s. planes)
 are estimated using the full covariance matrix.  The cell esds are taken
 into account individually in the estimation of esds in distances, angles
 and torsion angles; correlations between esds in cell parameters are only
 used when they are defined by crystal symmetry.  An approximate (isotropic)
 treatment of cell esds is used for estimating esds involving l.s. planes.
;
 
loop_
 _geom_bond_atom_site_label_1
 _geom_bond_atom_site_label_2
 _geom_bond_distance
 _geom_bond_site_symmetry_2
 _geom_bond_publ_flag
C1 O1 1.12(3) . ?
C1 Cr1 1.90(3) . ?
C2 O2 1.13(2) . ?
C2 Cr1 1.91(2) . ?
C3 O3 1.22(5) . ?
C3 Cr1 1.79(5) . ?
C3A O3A 1.16(4) . ?
C3A Cr1 1.86(4) . ?
C4 O4 1.21(5) . ?
C4 Cr1 1.59(4) . ?
C4A O4A 1.08(6) . ?
C4A Cr1 2.24(6) . ?
C5 O5 1.19(3) . ?
C5 Cr1 1.91(4) . ?
C5A O5A 1.20(4) . ?
C5A Cr1 1.83(4) . ?
C6 O6 1.20(2) . ?
C6 Mn1 1.73(2) . ?
C7 O7 1.165(17) . ?
C7 Mn1 1.762(15) . ?
C8 O8 1.138(19) . ?
C8 Mn1 1.80(2) . ?
C9 O9 1.161(19) . ?
C9 Mn2 1.762(18) . ?
C10 O10 1.15(2) . ?
C10 Mn2 1.77(2) . ?
C11 O11 1.17(2) . ?
C11 Mn2 1.77(2) . ?
C12 O12 1.151(17) . ?
C12 Mn3 1.789(16) . ?
C13 O13 1.170(18) . ?
C13 Mn3 1.735(19) . ?
C14 O14 1.16(2) . ?
C14 Mn3 1.78(2) . ?
C15 O15 1.16(3) . ?
C15 Cr2 1.83(3) . ?
C16 O16 1.165(18) . ?
C16 Cr2 1.861(18) . ?
C17A O17A 1.24(4) . ?
C17A Cr2 1.79(4) . ?
C17 O17 1.16(3) . ?
C17 Cr2 1.83(3) . ?
C18 O18 1.18(2) . ?
C18 Cr2 1.86(2) . ?
C19 O19 1.151(18) . ?
C19 Cr2 1.850(18) . ?
C20 C25 1.31(3) . ?
C20 C21 1.36(3) . ?
C20 P1 1.84(2) . ?
C21 C22 1.43(4) . ?
C21 H21 0.9300 . ?
C22 C23 1.30(4) . ?
C22 H22 0.9300 . ?
C23 C24 1.34(4) . ?
C23 H23 0.9300 . ?
C24 C25 1.45(3) . ?
C24 H24 0.9300 . ?
C25 H25 0.9300 . ?
C26 C27 1.38(3) . ?
C26 C31 1.43(3) . ?
C26 P1 1.80(2) . ?
C27 C28 1.37(3) . ?
C27 H27 0.9300 . ?
C28 C29 1.35(3) . ?
C28 H28 0.9300 . ?
C29 C30 1.35(3) . ?
C29 H29 0.9300 . ?
C30 C31 1.38(3) . ?
C30 H30 0.9300 . ?
C31 H31 0.9300 . ?
C32 C33 1.36(3) . ?
C32 C37 1.38(2) . ?
C32 P1 1.790(19) . ?
C33 C34 1.36(3) . ?
C33 H33 0.9300 . ?
C34 C35 1.35(3) . ?
C34 H34 0.9300 . ?
C35 C36 1.39(3) . ?
C35 H35 0.9300 . ?
C36 C37 1.35(3) . ?
C36 H36 0.9300 . ?
C37 H37 0.9300 . ?
C38 C43 1.36(2) . ?
C38 C39 1.39(2) . ?
C38 P2 1.805(17) . ?
C39 C40 1.44(3) . ?
C39 H39 0.9300 . ?
C40 C41 1.34(3) . ?
C40 H40 0.9300 . ?
C41 C42 1.37(3) . ?
C41 H41 0.9300 . ?
C42 C43 1.35(2) . ?
C42 H42 0.9300 . ?
C43 H43 0.9300 . ?
C44 C49 1.37(2) . ?
C44 C45 1.37(2) . ?
C44 P2 1.792(17) . ?
C45 C46 1.39(3) . ?
C45 H45 0.9300 . ?
C46 C47 1.35(3) . ?
C46 H46 0.9300 . ?
C47 C48 1.36(3) . ?
C47 H47 0.9300 . ?
C48 C49 1.41(3) . ?
C48 H48 0.9300 . ?
C49 H49 0.9300 . ?
C50 C51 1.35(2) . ?
C50 C55 1.40(2) . ?
C50 P2 1.783(19) . ?
C51 C52 1.35(2) . ?
C51 H51 0.9300 . ?
C52 C53 1.39(3) . ?
C52 H52 0.9300 . ?
C53 C54 1.35(3) . ?
C53 H53 0.9300 . ?
C54 C55 1.37(2) . ?
C54 H54 0.9300 . ?
C55 H55 0.9300 . ?
C56 C61 1.40(2) . ?
C56 C57 1.42(2) . ?
C56 P3 1.766(18) . ?
C57 C58 1.37(2) . ?
C57 H57 0.9300 . ?
C58 C59 1.35(3) . ?
C58 H58 0.9300 . ?
C59 C60 1.40(3) . ?
C59 H59 0.9300 . ?
C60 C61 1.37(2) . ?
C60 H60 0.9300 . ?
C61 H61 0.9300 . ?
C62 C67 1.35(2) . ?
C62 C63 1.40(2) . ?
C62 P3 1.800(16) . ?
C63 C64 1.42(2) . ?
C63 H63 0.9300 . ?
C64 C65 1.36(2) . ?
C64 H64 0.9300 . ?
C65 C66 1.39(2) . ?
C65 H65 0.9300 . ?
C66 C67 1.39(2) . ?
C66 H66 0.9300 . ?
C67 H67 0.9300 . ?
C68 C73 1.377(18) . ?
C68 C69 1.40(2) . ?
C68 P3 1.800(13) . ?
C69 C70 1.37(2) . ?
C69 H69 0.9300 . ?
C70 C71 1.34(2) . ?
C70 H70 0.9300 . ?
C71 C72 1.34(2) . ?
C71 H71 0.9300 . ?
C72 C73 1.40(2) . ?
C72 H72 0.9300 . ?
C73 H73 0.9300 . ?
C74 C79 1.39(2) . ?
C74 C75 1.415(19) . ?
C74 P4 1.782(16) . ?
C75 C76 1.33(2) . ?
C75 H75 0.9300 . ?
C76 C77 1.37(2) . ?
C76 H76 0.9300 . ?
C77 C78 1.35(2) . ?
C77 H77 0.9300 . ?
C78 C79 1.37(2) . ?
C78 H78 0.9300 . ?
C79 H79 0.9300 . ?
C80 C81 1.38(2) . ?
C80 C85 1.39(2) . ?
C80 P4 1.807(14) . ?
C81 C82 1.42(2) . ?
C81 H81 0.9300 . ?
C82 C83 1.38(2) . ?
C82 H82 0.9300 . ?
C83 C84 1.35(2) . ?
C83 H83 0.9300 . ?
C84 C85 1.39(2) . ?
C84 H84 0.9300 . ?
C85 H85 0.9300 . ?
C86 C91 1.33(2) . ?
C86 C87 1.39(2) . ?
C86 P4 1.820(14) . ?
C87 C88 1.41(3) . ?
C87 H87 0.9300 . ?
C88 C89 1.34(3) . ?
C88 H88 0.9300 . ?
C89 C90 1.35(3) . ?
C89 H89 0.9300 . ?
C90 C91 1.41(3) . ?
C90 H90 0.9300 . ?
C91 H91 0.9300 . ?
Cr1 S1 2.461(5) . ?
Cr2 S2 2.445(4) . ?
Mn1 S1 2.298(5) . ?
Mn1 S2 2.336(4) . ?
Mn1 Mn2 2.702(4) . ?
Mn1 H1' 1.3997 . ?
Mn2 S1 2.324(5) . ?
Mn2 S2 2.339(5) . ?
Mn2 Mn3 2.728(3) . ?
Mn2 H1' 1.7456 . ?
Mn3 S1 2.301(4) . ?
Mn3 S2 2.302(5) . ?
N1 P2 1.568(15) . ?
N1 P1 1.576(15) . ?
N2 P4 1.569(13) . ?
N2 P3 1.594(12) . ?
 
loop_
 _geom_angle_atom_site_label_1
 _geom_angle_atom_site_label_2
 _geom_angle_atom_site_label_3
 _geom_angle
 _geom_angle_site_symmetry_1
 _geom_angle_site_symmetry_3
 _geom_angle_publ_flag
O1 C1 Cr1 176(3) . . ?
O2 C2 Cr1 177.8(19) . . ?
O3 C3 Cr1 161(5) . . ?
O3A C3A Cr1 180(4) . . ?
O4 C4 Cr1 173(3) . . ?
O4A C4A Cr1 168(3) . . ?
O5 C5 Cr1 172(3) . . ?
O5A C5A Cr1 164(4) . . ?
O6 C6 Mn1 175.9(16) . . ?
O7 C7 Mn1 179.4(19) . . ?
O8 C8 Mn1 172.9(18) . . ?
O9 C9 Mn2 176(2) . . ?
O10 C10 Mn2 176(2) . . ?
O11 C11 Mn2 168.7(18) . . ?
O12 C12 Mn3 177.0(18) . . ?
O13 C13 Mn3 178.5(17) . . ?
O14 C14 Mn3 177.2(19) . . ?
O15 C15 Cr2 177(2) . . ?
O16 C16 Cr2 177.7(16) . . ?
O17A C17A Cr2 164(4) . . ?
O17 C17 Cr2 178(3) . . ?
O18 C18 Cr2 177.2(17) . . ?
O19 C19 Cr2 174.0(15) . . ?
C25 C20 C21 120(3) . . ?
C25 C20 P1 118.3(19) . . ?
C21 C20 P1 121(2) . . ?
C20 C21 C22 121(3) . . ?
C20 C21 H21 119.3 . . ?
C22 C21 H21 119.3 . . ?
C23 C22 C21 115(3) . . ?
C23 C22 H22 122.5 . . ?
C21 C22 H22 122.5 . . ?
C22 C23 C24 126(3) . . ?
C22 C23 H23 117.0 . . ?
C24 C23 H23 117.0 . . ?
C23 C24 C25 117(3) . . ?
C23 C24 H24 121.3 . . ?
C25 C24 H24 121.3 . . ?
C20 C25 C24 119(3) . . ?
C20 C25 H25 120.6 . . ?
C24 C25 H25 120.6 . . ?
C27 C26 C31 119(2) . . ?
C27 C26 P1 120.9(18) . . ?
C31 C26 P1 119.9(17) . . ?
C28 C27 C26 118(2) . . ?
C28 C27 H27 121.1 . . ?
C26 C27 H27 121.1 . . ?
C29 C28 C27 124(3) . . ?
C29 C28 H28 118.2 . . ?
C27 C28 H28 118.2 . . ?
C28 C29 C30 120(3) . . ?
C28 C29 H29 120.0 . . ?
C30 C29 H29 120.0 . . ?
C29 C30 C31 120(3) . . ?
C29 C30 H30 120.2 . . ?
C31 C30 H30 120.2 . . ?
C30 C31 C26 120(2) . . ?
C30 C31 H31 120.2 . . ?
C26 C31 H31 120.2 . . ?
C33 C32 C37 117.8(19) . . ?
C33 C32 P1 123.2(17) . . ?
C37 C32 P1 118.7(15) . . ?
C34 C33 C32 122(2) . . ?
C34 C33 H33 119.1 . . ?
C32 C33 H33 119.1 . . ?
C35 C34 C33 120(2) . . ?
C35 C34 H34 119.9 . . ?
C33 C34 H34 119.9 . . ?
C34 C35 C36 120(2) . . ?
C34 C35 H35 120.2 . . ?
C36 C35 H35 120.2 . . ?
C37 C36 C35 119(2) . . ?
C37 C36 H36 120.6 . . ?
C35 C36 H36 120.6 . . ?
C36 C37 C32 122(2) . . ?
C36 C37 H37 119.0 . . ?
C32 C37 H37 119.0 . . ?
C43 C38 C39 119.6(17) . . ?
C43 C38 P2 124.3(15) . . ?
C39 C38 P2 115.8(16) . . ?
C38 C39 C40 116.3(19) . . ?
C38 C39 H39 121.8 . . ?
C40 C39 H39 121.8 . . ?
C41 C40 C39 120.3(18) . . ?
C41 C40 H40 119.8 . . ?
C39 C40 H40 119.8 . . ?
C40 C41 C42 122.3(19) . . ?
C40 C41 H41 118.8 . . ?
C42 C41 H41 118.8 . . ?
C43 C42 C41 117(2) . . ?
C43 C42 H42 121.5 . . ?
C41 C42 H42 121.5 . . ?
C42 C43 C38 124.3(19) . . ?
C42 C43 H43 117.9 . . ?
C38 C43 H43 117.9 . . ?
C49 C44 C45 118.5(17) . . ?
C49 C44 P2 120.1(16) . . ?
C45 C44 P2 121.3(14) . . ?
C44 C45 C46 119(2) . . ?
C44 C45 H45 120.4 . . ?
C46 C45 H45 120.4 . . ?
C47 C46 C45 122(2) . . ?
C47 C46 H46 119.1 . . ?
C45 C46 H46 119.1 . . ?
C46 C47 C48 121(2) . . ?
C46 C47 H47 119.7 . . ?
C48 C47 H47 119.7 . . ?
C47 C48 C49 118(2) . . ?
C47 C48 H48 121.1 . . ?
C49 C48 H48 121.1 . . ?
C44 C49 C48 122(2) . . ?
C44 C49 H49 119.0 . . ?
C48 C49 H49 119.0 . . ?
C51 C50 C55 116.5(18) . . ?
C51 C50 P2 123.2(16) . . ?
C55 C50 P2 120.2(15) . . ?
C52 C51 C50 123.2(19) . . ?
C52 C51 H51 118.4 . . ?
C50 C51 H51 118.4 . . ?
C51 C52 C53 120(2) . . ?
C51 C52 H52 120.1 . . ?
C53 C52 H52 120.1 . . ?
C54 C53 C52 119(2) . . ?
C54 C53 H53 120.5 . . ?
C52 C53 H53 120.5 . . ?
C53 C54 C55 121(2) . . ?
C53 C54 H54 119.7 . . ?
C55 C54 H54 119.7 . . ?
C54 C55 C50 121(2) . . ?
C54 C55 H55 119.6 . . ?
C50 C55 H55 119.6 . . ?
C61 C56 C57 115.7(17) . . ?
C61 C56 P3 119.1(14) . . ?
C57 C56 P3 124.9(15) . . ?
C58 C57 C56 121.6(19) . . ?
C58 C57 H57 119.2 . . ?
C56 C57 H57 119.2 . . ?
C59 C58 C57 121(2) . . ?
C59 C58 H58 119.5 . . ?
C57 C58 H58 119.5 . . ?
C58 C59 C60 120(2) . . ?
C58 C59 H59 120.0 . . ?
C60 C59 H59 120.0 . . ?
C61 C60 C59 120(2) . . ?
C61 C60 H60 120.2 . . ?
C59 C60 H60 120.2 . . ?
C60 C61 C56 122.3(19) . . ?
C60 C61 H61 118.9 . . ?
C56 C61 H61 118.9 . . ?
C67 C62 C63 119.9(15) . . ?
C67 C62 P3 120.2(12) . . ?
C63 C62 P3 119.5(13) . . ?
C62 C63 C64 118.9(17) . . ?
C62 C63 H63 120.6 . . ?
C64 C63 H63 120.6 . . ?
C65 C64 C63 118.7(17) . . ?
C65 C64 H64 120.7 . . ?
C63 C64 H64 120.7 . . ?
C64 C65 C66 123.2(18) . . ?
C64 C65 H65 118.4 . . ?
C66 C65 H65 118.4 . . ?
C65 C66 C67 116.5(18) . . ?
C65 C66 H66 121.7 . . ?
C67 C66 H66 121.7 . . ?
C62 C67 C66 122.8(16) . . ?
C62 C67 H67 118.6 . . ?
C66 C67 H67 118.6 . . ?
C73 C68 C69 119.7(14) . . ?
C73 C68 P3 119.5(12) . . ?
C69 C68 P3 120.5(11) . . ?
C70 C69 C68 120.2(15) . . ?
C70 C69 H69 119.9 . . ?
C68 C69 H69 119.9 . . ?
C71 C70 C69 119.9(17) . . ?
C71 C70 H70 120.0 . . ?
C69 C70 H70 120.0 . . ?
C72 C71 C70 121.2(17) . . ?
C72 C71 H71 119.4 . . ?
C70 C71 H71 119.4 . . ?
C71 C72 C73 121.2(16) . . ?
C71 C72 H72 119.4 . . ?
C73 C72 H72 119.4 . . ?
C68 C73 C72 117.6(15) . . ?
C68 C73 H73 121.2 . . ?
C72 C73 H73 121.2 . . ?
C79 C74 C75 118.3(15) . . ?
C79 C74 P4 123.5(11) . . ?
C75 C74 P4 118.2(12) . . ?
C76 C75 C74 119.5(16) . . ?
C76 C75 H75 120.2 . . ?
C74 C75 H75 120.2 . . ?
C75 C76 C77 122.4(16) . . ?
C75 C76 H76 118.8 . . ?
C77 C76 H76 118.8 . . ?
C78 C77 C76 118.0(18) . . ?
C78 C77 H77 121.0 . . ?
C76 C77 H77 121.0 . . ?
C77 C78 C79 122.9(18) . . ?
C77 C78 H78 118.5 . . ?
C79 C78 H78 118.5 . . ?
C78 C79 C74 118.7(14) . . ?
C78 C79 H79 120.6 . . ?
C74 C79 H79 120.6 . . ?
C81 C80 C85 121.4(14) . . ?
C81 C80 P4 117.1(13) . . ?
C85 C80 P4 121.5(12) . . ?
C80 C81 C82 117.6(16) . . ?
C80 C81 H81 121.2 . . ?
C82 C81 H81 121.2 . . ?
C83 C82 C81 120.0(16) . . ?
C83 C82 H82 120.0 . . ?
C81 C82 H82 120.0 . . ?
C84 C83 C82 121.2(17) . . ?
C84 C83 H83 119.4 . . ?
C82 C83 H83 119.4 . . ?
C83 C84 C85 120.3(18) . . ?
C83 C84 H84 119.9 . . ?
C85 C84 H84 119.9 . . ?
C84 C85 C80 119.4(16) . . ?
C84 C85 H85 120.3 . . ?
C80 C85 H85 120.3 . . ?
C91 C86 C87 121.8(16) . . ?
C91 C86 P4 120.8(14) . . ?
C87 C86 P4 117.4(14) . . ?
C86 C87 C88 118(2) . . ?
C86 C87 H87 121.1 . . ?
C88 C87 H87 121.1 . . ?
C89 C88 C87 120(2) . . ?
C89 C88 H88 120.1 . . ?
C87 C88 H88 120.1 . . ?
C88 C89 C90 122(2) . . ?
C88 C89 H89 119.0 . . ?
C90 C89 H89 119.0 . . ?
C89 C90 C91 119(2) . . ?
C89 C90 H90 120.5 . . ?
C91 C90 H90 120.5 . . ?
C86 C91 C90 120(2) . . ?
C86 C91 H91 120.2 . . ?
C90 C91 H91 120.2 . . ?
C4 Cr1 C3 102.4(19) . . ?
C4 Cr1 C5A 72.8(18) . . ?
C3 Cr1 C5A 84.8(19) . . ?
C4 Cr1 C3A 80.9(16) . . ?
C3 Cr1 C3A 24.1(16) . . ?
C5A Cr1 C3A 88.7(17) . . ?
C4 Cr1 C1 173.4(15) . . ?
C3 Cr1 C1 80.2(18) . . ?
C5A Cr1 C1 101.7(17) . . ?
C3A Cr1 C1 102.7(15) . . ?
C4 Cr1 C2 92.4(13) . . ?
C3 Cr1 C2 93.1(16) . . ?
C5A Cr1 C2 164.1(17) . . ?
C3A Cr1 C2 83.2(12) . . ?
C1 Cr1 C2 93.5(11) . . ?
C4 Cr1 C5 96.0(16) . . ?
C3 Cr1 C5 83.0(18) . . ?
C5A Cr1 C5 23.5(14) . . ?
C3A Cr1 C5 95.9(15) . . ?
C1 Cr1 C5 78.3(14) . . ?
C2 Cr1 C5 171.4(13) . . ?
C4 Cr1 C4A 6.7(18) . . ?
C3 Cr1 C4A 103.5(19) . . ?
C5A Cr1 C4A 79.5(19) . . ?
C3A Cr1 C4A 80.8(16) . . ?
C1 Cr1 C4A 176.3(13) . . ?
C2 Cr1 C4A 85.7(13) . . ?
C5 Cr1 C4A 102.7(16) . . ?
C4 Cr1 S1 89.1(11) . . ?
C3 Cr1 S1 168.2(16) . . ?
C5A Cr1 S1 96.6(13) . . ?
C3A Cr1 S1 166.8(13) . . ?
C1 Cr1 S1 88.1(8) . . ?
C2 Cr1 S1 88.7(6) . . ?
C5 Cr1 S1 93.6(10) . . ?
C4A Cr1 S1 88.2(10) . . ?
C17A Cr2 C15 77.6(16) . . ?
C17A Cr2 C17 22.4(13) . . ?
C15 Cr2 C17 99.8(12) . . ?
C17A Cr2 C19 82.6(13) . . ?
C15 Cr2 C19 89.4(9) . . ?
C17 Cr2 C19 85.6(9) . . ?
C17A Cr2 C18 104.4(15) . . ?
C15 Cr2 C18 177.5(9) . . ?
C17 Cr2 C18 82.3(10) . . ?
C19 Cr2 C18 89.2(8) . . ?
C17A Cr2 C16 93.8(13) . . ?
C15 Cr2 C16 89.1(9) . . ?
C17 Cr2 C16 91.3(9) . . ?
C19 Cr2 C16 176.3(7) . . ?
C18 Cr2 C16 92.3(8) . . ?
C17A Cr2 S2 165.4(15) . . ?
C15 Cr2 S2 88.5(8) . . ?
C17 Cr2 S2 171.5(9) . . ?
C19 Cr2 S2 92.8(5) . . ?
C18 Cr2 S2 89.4(5) . . ?
C16 Cr2 S2 90.5(5) . . ?
C6 Mn1 C7 92.2(8) . . ?
C6 Mn1 C8 93.6(9) . . ?
C7 Mn1 C8 89.7(7) . . ?
C6 Mn1 S1 96.8(7) . . ?
C7 Mn1 S1 97.6(6) . . ?
C8 Mn1 S1 167.1(6) . . ?
C6 Mn1 S2 103.5(6) . . ?
C7 Mn1 S2 163.3(6) . . ?
C8 Mn1 S2 94.9(5) . . ?
S1 Mn1 S2 75.26(15) . . ?
C6 Mn1 Mn2 145.6(7) . . ?
C7 Mn1 Mn2 108.8(6) . . ?
C8 Mn1 Mn2 112.9(6) . . ?
S1 Mn1 Mn2 54.66(14) . . ?
S2 Mn1 Mn2 54.74(13) . . ?
C6 Mn1 H1' 176.3 . . ?
C7 Mn1 H1' 84.7 . . ?
C8 Mn1 H1' 88.6 . . ?
S1 Mn1 H1' 81.5 . . ?
S2 Mn1 H1' 79.4 . . ?
Mn2 Mn1 H1' 34.8 . . ?
C9 Mn2 C11 92.0(9) . . ?
C9 Mn2 C10 91.9(9) . . ?
C11 Mn2 C10 87.9(10) . . ?
C9 Mn2 S1 94.6(6) . . ?
C11 Mn2 S1 106.0(7) . . ?
C10 Mn2 S1 164.3(7) . . ?
C9 Mn2 S2 161.5(7) . . ?
C11 Mn2 S2 105.3(6) . . ?
C10 Mn2 S2 95.0(7) . . ?
S1 Mn2 S2 74.73(15) . . ?
C9 Mn2 Mn1 106.9(7) . . ?
C11 Mn2 Mn1 152.5(7) . . ?
C10 Mn2 Mn1 110.7(7) . . ?
S1 Mn2 Mn1 53.78(14) . . ?
S2 Mn2 Mn1 54.64(12) . . ?
C9 Mn2 Mn3 131.3(6) . . ?
C11 Mn2 Mn3 68.4(7) . . ?
C10 Mn2 Mn3 129.2(6) . . ?
S1 Mn2 Mn3 53.46(12) . . ?
S2 Mn2 Mn3 53.36(12) . . ?
Mn1 Mn2 Mn3 84.04(11) . . ?
C9 Mn2 H1' 89.2 . . ?
C11 Mn2 H1' 178.6 . . ?
C10 Mn2 H1' 91.3 . . ?
S1 Mn2 H1' 74.6 . . ?
S2 Mn2 H1' 73.6 . . ?
Mn1 Mn2 H1' 27.2 . . ?
Mn3 Mn2 H1' 111.2 . . ?
C13 Mn3 C14 91.0(9) . . ?
C13 Mn3 C12 91.8(8) . . ?
C14 Mn3 C12 88.2(9) . . ?
C13 Mn3 S1 102.6(6) . . ?
C14 Mn3 S1 96.7(6) . . ?
C12 Mn3 S1 164.6(6) . . ?
C13 Mn3 S2 102.1(6) . . ?
C14 Mn3 S2 166.0(6) . . ?
C12 Mn3 S2 96.0(6) . . ?
S1 Mn3 S2 75.88(15) . . ?
C13 Mn3 Mn2 148.3(6) . . ?
C14 Mn3 Mn2 111.4(6) . . ?
C12 Mn3 Mn2 110.4(6) . . ?
S1 Mn3 Mn2 54.23(13) . . ?
S2 Mn3 Mn2 54.63(12) . . ?
P2 N1 P1 138.6(10) . . ?
P4 N2 P3 137.5(8) . . ?
N1 P1 C32 113.0(9) . . ?
N1 P1 C26 109.1(9) . . ?
C32 P1 C26 106.6(10) . . ?
N1 P1 C20 111.5(10) . . ?
C32 P1 C20 106.5(10) . . ?
C26 P1 C20 110.0(11) . . ?
N1 P2 C50 108.9(9) . . ?
N1 P2 C44 113.3(8) . . ?
C50 P2 C44 109.0(9) . . ?
N1 P2 C38 111.7(9) . . ?
C50 P2 C38 106.0(8) . . ?
C44 P2 C38 107.7(9) . . ?
N2 P3 C56 106.9(8) . . ?
N2 P3 C68 110.2(7) . . ?
C56 P3 C68 107.8(7) . . ?
N2 P3 C62 115.0(7) . . ?
C56 P3 C62 109.5(8) . . ?
C68 P3 C62 107.3(7) . . ?
N2 P4 C74 115.5(7) . . ?
N2 P4 C80 107.0(7) . . ?
C74 P4 C80 107.7(7) . . ?
N2 P4 C86 112.0(8) . . ?
C74 P4 C86 107.5(7) . . ?
C80 P4 C86 106.7(7) . . ?
Mn1 S1 Mn3 104.45(17) . . ?
Mn1 S1 Mn2 71.56(16) . . ?
Mn3 S1 Mn2 72.31(15) . . ?
Mn1 S1 Cr1 127.9(2) . . ?
Mn3 S1 Cr1 126.1(2) . . ?
Mn2 S1 Cr1 131.1(2) . . ?
Mn3 S2 Mn1 103.21(16) . . ?
Mn3 S2 Mn2 72.01(15) . . ?
Mn1 S2 Mn2 70.61(13) . . ?
Mn3 S2 Cr2 127.98(17) . . ?
Mn1 S2 Cr2 128.5(2) . . ?
Mn2 S2 Cr2 125.67(19) . . ?
 
_diffrn_measured_fraction_theta_max    0.955
_diffrn_reflns_theta_full              25.01
_diffrn_measured_fraction_theta_full   0.955
_refine_diff_density_max    0.770
_refine_diff_density_min   -1.032
_refine_diff_density_rms    0.156

#=============================================END

data_3b
 
_audit_creation_method            SHELXL-97
_chemical_name_systematic
;
 ?
;
_chemical_name_common             ?
_chemical_melting_point           ?
_chemical_formula_moiety          'C91 H61 Cr2 Mn3 N2 O19 P4 Se2'
_chemical_formula_sum             'C91 H61 Cr2 Mn3 N2 O19 P4 Se2'
_chemical_formula_weight          2037.04
 
loop_
 _atom_type_symbol
 _atom_type_description
 _atom_type_scat_dispersion_real
 _atom_type_scat_dispersion_imag
 _atom_type_scat_source
 'C'  'C'   0.0033   0.0016
 'International Tables Vol C Tables 4.2.6.8 and 6.1.1.4'
 'H'  'H'   0.0000   0.0000
 'International Tables Vol C Tables 4.2.6.8 and 6.1.1.4'
 'N'  'N'   0.0061   0.0033
 'International Tables Vol C Tables 4.2.6.8 and 6.1.1.4'
 'O'  'O'   0.0106   0.0060
 'International Tables Vol C Tables 4.2.6.8 and 6.1.1.4'
 'P'  'P'   0.1023   0.0942
 'International Tables Vol C Tables 4.2.6.8 and 6.1.1.4'
 'Cr'  'Cr'   0.3209   0.6236
 'International Tables Vol C Tables 4.2.6.8 and 6.1.1.4'
 'Mn'  'Mn'   0.3368   0.7283
 'International Tables Vol C Tables 4.2.6.8 and 6.1.1.4'
 'Se'  'Se'  -0.0929   2.2259
 'International Tables Vol C Tables 4.2.6.8 and 6.1.1.4'
 
_symmetry_cell_setting            triclinic
_symmetry_space_group_name_H-M    'P -1'
 
loop_
 _symmetry_equiv_pos_as_xyz
 'x, y, z'
 '-x, -y, -z'
 
_cell_length_a                    14.3443(11)
_cell_length_b                    14.8455(10)
_cell_length_c                    23.4938(17)
_cell_angle_alpha                 79.085(4)
_cell_angle_beta                  83.113(4)
_cell_angle_gamma                 64.752(3)
_cell_volume                      4438.9(6)
_cell_formula_units_Z             2
_cell_measurement_temperature     100(2)
_cell_measurement_reflns_used     0
_cell_measurement_theta_min       0
_cell_measurement_theta_max       0
 
_exptl_crystal_description        prism
_exptl_crystal_colour             red-orange(dark)
_exptl_crystal_size_max           0.19
_exptl_crystal_size_mid           0.09
_exptl_crystal_size_min           0.04
_exptl_crystal_density_meas       ?
_exptl_crystal_density_diffrn     1.524
_exptl_crystal_density_method     'not measured'
_exptl_crystal_F_000              2048
_exptl_absorpt_coefficient_mu     1.614
_exptl_absorpt_correction_type    multi-scan
_exptl_absorpt_correction_T_min   0.7491
_exptl_absorpt_correction_T_max   0.9383
_exptl_absorpt_process_details    ?
 
_exptl_special_details
;
 ?
;
 
_diffrn_ambient_temperature       100(2)
_diffrn_radiation_wavelength      0.71073
_diffrn_radiation_type            MoK\a
_diffrn_radiation_source          'fine-focus sealed tube'
_diffrn_radiation_monochromator   graphite
_diffrn_measurement_device_type   ?
_diffrn_measurement_method        ?
_diffrn_detector_area_resol_mean  ?
_diffrn_standards_number          ?
_diffrn_standards_interval_count  ?
_diffrn_standards_interval_time   ?
_diffrn_standards_decay_%         ?
_diffrn_reflns_number             27157
_diffrn_reflns_av_R_equivalents   0.0470
_diffrn_reflns_av_sigmaI/netI     0.1176
_diffrn_reflns_limit_h_min        -17
_diffrn_reflns_limit_h_max        14
_diffrn_reflns_limit_k_min        -17
_diffrn_reflns_limit_k_max        15
_diffrn_reflns_limit_l_min        -27
_diffrn_reflns_limit_l_max        21
_diffrn_reflns_theta_min          1.57
_diffrn_reflns_theta_max          25.03
_reflns_number_total              15314
_reflns_number_gt                 9147
_reflns_threshold_expression      >2sigma(I)
 
_computing_data_collection        ?
_computing_cell_refinement        ?
_computing_data_reduction         ?
_computing_structure_solution     'SHELXS-86 (Sheldrick, 1986)'
_computing_structure_refinement   'SHELXL-97 (Sheldrick, 1997)'
_computing_molecular_graphics     'Ortep-3 for Windows (Farrugia, 1997)'
_computing_publication_material   'WinGX publication routines (Farrugia, 1999)'
 
_refine_special_details
;
 Refinement of F^2^ against ALL reflections.  The weighted R-factor wR and
 goodness of fit S are based on F^2^, conventional R-factors R are based
 on F, with F set to zero for negative F^2^. The threshold expression of
 F^2^ > 2sigma(F^2^) is used only for calculating R-factors(gt) etc. and is
 not relevant to the choice of reflections for refinement.  R-factors based
 on F^2^ are statistically about twice as large as those based on F, and R-
 factors based on ALL data will be even larger.
;
 
_refine_ls_structure_factor_coef  Fsqd
_refine_ls_matrix_type            full
_refine_ls_weighting_scheme       calc
_refine_ls_weighting_details
 'calc w=1/[\s^2^(Fo^2^)+(0.0299P)^2^+15.9313P] where P=(Fo^2^+2Fc^2^)/3'
_atom_sites_solution_primary      direct
_atom_sites_solution_secondary    difmap
_atom_sites_solution_hydrogens    geom
_refine_ls_hydrogen_treatment     fixed
_refine_ls_extinction_method      none
_refine_ls_extinction_coef        ?
_refine_ls_number_reflns          15314
_refine_ls_number_parameters      1096
_refine_ls_number_restraints      0
_refine_ls_R_factor_all           0.1367
_refine_ls_R_factor_gt            0.0651
_refine_ls_wR_factor_ref          0.1346
_refine_ls_wR_factor_gt           0.1119
_refine_ls_goodness_of_fit_ref    1.072
_refine_ls_restrained_S_all       1.072
_refine_ls_shift/su_max           0.001
_refine_ls_shift/su_mean          0.000
 
loop_
 _atom_site_label
 _atom_site_type_symbol
 _atom_site_fract_x
 _atom_site_fract_y
 _atom_site_fract_z
 _atom_site_U_iso_or_equiv
 _atom_site_adp_type
 _atom_site_occupancy
 _atom_site_symmetry_multiplicity
 _atom_site_calc_flag
 _atom_site_refinement_flags
 _atom_site_disorder_assembly
 _atom_site_disorder_group
C1 C -0.4001(6) 1.0717(5) 0.2223(4) 0.043(2) Uani 1 1 d . . .
C2 C -0.3084(6) 1.1917(6) 0.2280(4) 0.035(2) Uani 1 1 d . . .
C3 C -0.2224(6) 1.0583(5) 0.1584(4) 0.030(2) Uani 1 1 d . . .
C4 C -0.2342(5) 0.9091(5) 0.2443(3) 0.0251(18) Uani 1 1 d . . .
C5 C -0.2979(5) 1.0499(6) 0.3169(4) 0.031(2) Uani 1 1 d . . .
C6 C 0.2824(6) 0.8833(5) 0.3944(4) 0.028(2) Uani 1 1 d . . .
C7 C 0.2999(5) 1.0187(6) 0.3085(3) 0.0273(19) Uani 1 1 d . . .
C8 C 0.4559(6) 0.8530(6) 0.3291(4) 0.041(2) Uani 1 1 d . . .
C9 C 0.3468(5) 0.8929(5) 0.2336(4) 0.0243(18) Uani 1 1 d . . .
C10 C 0.3460(5) 0.7464(5) 0.3190(3) 0.0271(18) Uani 1 1 d . . .
C11 C 0.1964(6) 0.7876(5) 0.2015(3) 0.0225(17) Uani 1 1 d . . .
C12 C 0.0632(5) 0.7586(5) 0.2778(3) 0.0225(17) Uani 1 1 d . . .
C13 C 0.0109(5) 0.8434(5) 0.1738(3) 0.0207(17) Uani 1 1 d . . .
C14 C 0.1372(6) 1.1131(5) 0.2040(3) 0.0245(18) Uani 1 1 d . . .
C15 C 0.0894(6) 1.0068(6) 0.1513(4) 0.0308(19) Uani 1 1 d . . .
C16 C -0.0549(6) 1.1716(5) 0.1790(3) 0.0264(18) Uani 1 1 d . . .
C17 C -0.1400(5) 1.1718(5) 0.3368(3) 0.0219(17) Uani 1 1 d . . .
C18 C -0.0634(5) 0.9934(5) 0.3944(3) 0.0193(12) Uani 1 1 d . . .
C19 C 0.0433(5) 1.0975(5) 0.3749(3) 0.0193(12) Uani 1 1 d . . .
C20 C 0.8892(5) 0.5550(5) 0.1612(3) 0.0200(17) Uani 1 1 d . . .
C21 C 0.9355(5) 0.5986(5) 0.1898(3) 0.0211(17) Uani 1 1 d . . .
H21 H 0.8958 0.6623 0.2018 0.025 Uiso 1 1 calc R . .
C22 C 1.0394(5) 0.5486(5) 0.2005(3) 0.0252(18) Uani 1 1 d . . .
H22 H 1.0715 0.5782 0.2196 0.030 Uiso 1 1 calc R . .
C23 C 1.0966(5) 0.4554(6) 0.1833(3) 0.0287(19) Uani 1 1 d . . .
H23 H 1.1676 0.4204 0.1915 0.034 Uiso 1 1 calc R . .
C24 C 1.0515(5) 0.4129(5) 0.1544(3) 0.0275(19) Uani 1 1 d . . .
H24 H 1.0915 0.3499 0.1416 0.033 Uiso 1 1 calc R . .
C25 C 0.9461(5) 0.4635(5) 0.1439(3) 0.0226(17) Uani 1 1 d . . .
H25 H 0.9141 0.4341 0.1246 0.027 Uiso 1 1 calc R . .
C26 C 0.6910(5) 0.5875(5) 0.2183(3) 0.0163(16) Uani 1 1 d . . .
C27 C 0.6616(5) 0.5068(5) 0.2275(3) 0.0227(17) Uani 1 1 d . . .
H27 H 0.6683 0.4717 0.1964 0.027 Uiso 1 1 calc R . .
C28 C 0.6235(5) 0.4779(5) 0.2806(3) 0.0259(18) Uani 1 1 d . . .
H28 H 0.6042 0.4229 0.2860 0.031 Uiso 1 1 calc R . .
C29 C 0.6129(5) 0.5286(5) 0.3260(3) 0.0254(18) Uani 1 1 d . . .
H29 H 0.5859 0.5091 0.3628 0.030 Uiso 1 1 calc R . .
C30 C 0.6422(5) 0.6086(5) 0.3178(3) 0.0241(18) Uani 1 1 d . . .
H30 H 0.6355 0.6432 0.3493 0.029 Uiso 1 1 calc R . .
C31 C 0.6806(5) 0.6378(5) 0.2649(3) 0.0188(16) Uani 1 1 d . . .
H31 H 0.7003 0.6925 0.2598 0.023 Uiso 1 1 calc R . .
C32 C 0.7130(5) 0.7493(5) 0.1342(3) 0.0198(17) Uani 1 1 d . . .
C33 C 0.6103(5) 0.8135(5) 0.1464(3) 0.0256(18) Uani 1 1 d . . .
H33 H 0.5644 0.7870 0.1675 0.031 Uiso 1 1 calc R . .
C34 C 0.5763(6) 0.9162(6) 0.1273(4) 0.039(2) Uani 1 1 d . . .
H34 H 0.5067 0.9603 0.1352 0.046 Uiso 1 1 calc R . .
C35 C 0.6427(6) 0.9540(5) 0.0972(3) 0.032(2) Uani 1 1 d . . .
H35 H 0.6183 1.0245 0.0842 0.038 Uiso 1 1 calc R . .
C36 C 0.7437(6) 0.8925(5) 0.0853(3) 0.0306(19) Uani 1 1 d . . .
H36 H 0.7888 0.9203 0.0645 0.037 Uiso 1 1 calc R . .
C37 C 0.7793(5) 0.7901(5) 0.1037(3) 0.0229(17) Uani 1 1 d . . .
H37 H 0.8492 0.7472 0.0955 0.028 Uiso 1 1 calc R . .
C38 C 0.5742(5) 0.6674(5) 0.0198(3) 0.0225(17) Uani 1 1 d . . .
C39 C 0.5031(6) 0.7075(6) 0.0628(3) 0.034(2) Uani 1 1 d . . .
H39 H 0.5238 0.6918 0.1017 0.041 Uiso 1 1 calc R . .
C40 C 0.4010(6) 0.7708(6) 0.0504(4) 0.039(2) Uani 1 1 d . . .
H40 H 0.3522 0.7986 0.0804 0.046 Uiso 1 1 calc R . .
C41 C 0.3718(6) 0.7927(6) -0.0064(4) 0.032(2) Uani 1 1 d . . .
H41 H 0.3027 0.8368 -0.0156 0.038 Uiso 1 1 calc R . .
C42 C 0.4425(6) 0.7508(6) -0.0495(3) 0.033(2) Uani 1 1 d . . .
H42 H 0.4215 0.7648 -0.0882 0.040 Uiso 1 1 calc R . .
C43 C 0.5436(6) 0.6887(5) -0.0367(3) 0.0309(19) Uani 1 1 d . . .
H43 H 0.5922 0.6605 -0.0667 0.037 Uiso 1 1 calc R . .
C44 C 0.7785(5) 0.6661(5) -0.0016(3) 0.0194(17) Uani 1 1 d . . .
C45 C 0.7306(6) 0.7652(5) -0.0294(3) 0.0250(18) Uani 1 1 d . . .
H45 H 0.6579 0.7964 -0.0331 0.030 Uiso 1 1 calc R . .
C46 C 0.7908(6) 0.8180(5) -0.0517(3) 0.031(2) Uani 1 1 d . . .
H46 H 0.7586 0.8854 -0.0709 0.037 Uiso 1 1 calc R . .
C47 C 0.8960(6) 0.7740(6) -0.0464(3) 0.035(2) Uani 1 1 d . . .
H47 H 0.9356 0.8113 -0.0615 0.042 Uiso 1 1 calc R . .
C48 C 0.9439(6) 0.6760(6) -0.0191(3) 0.0309(19) Uani 1 1 d . . .
H48 H 1.0165 0.6457 -0.0153 0.037 Uiso 1 1 calc R . .
C49 C 0.8853(5) 0.6216(5) 0.0029(3) 0.0224(17) Uani 1 1 d . . .
H49 H 0.9185 0.5537 0.0211 0.027 Uiso 1 1 calc R . .
C50 C 0.7556(5) 0.4791(5) 0.0081(3) 0.0215(17) Uani 1 1 d . . .
C51 C 0.7816(6) 0.4756(6) -0.0509(3) 0.0316(19) Uani 1 1 d . . .
H51 H 0.7741 0.5356 -0.0767 0.038 Uiso 1 1 calc R . .
C52 C 0.8181(6) 0.3849(6) -0.0719(4) 0.037(2) Uani 1 1 d . . .
H52 H 0.8358 0.3827 -0.1121 0.044 Uiso 1 1 calc R . .
C53 C 0.8289(6) 0.2975(6) -0.0344(3) 0.035(2) Uani 1 1 d . . .
H53 H 0.8534 0.2353 -0.0488 0.042 Uiso 1 1 calc R . .
C54 C 0.8040(6) 0.3005(5) 0.0240(3) 0.0296(19) Uani 1 1 d . . .
H54 H 0.8121 0.2402 0.0497 0.036 Uiso 1 1 calc R . .
C55 C 0.7674(5) 0.3905(5) 0.0453(3) 0.0227(17) Uani 1 1 d . . .
H55 H 0.7502 0.3920 0.0856 0.027 Uiso 1 1 calc R . .
C56 C 0.1179(5) 0.3880(4) 0.3434(3) 0.0128(15) Uani 1 1 d . . .
C57 C 0.0399(5) 0.4781(5) 0.3547(3) 0.0193(16) Uani 1 1 d . . .
H57 H 0.0542 0.5225 0.3729 0.023 Uiso 1 1 calc R . .
C58 C -0.0595(5) 0.5035(5) 0.3394(3) 0.0175(16) Uani 1 1 d . . .
H58 H -0.1133 0.5664 0.3460 0.021 Uiso 1 1 calc R . .
C59 C -0.0802(5) 0.4375(5) 0.3144(3) 0.0212(17) Uani 1 1 d . . .
H59 H -0.1489 0.4539 0.3053 0.025 Uiso 1 1 calc R . .
C60 C -0.0015(5) 0.3474(5) 0.3027(3) 0.0195(17) Uani 1 1 d . . .
H60 H -0.0160 0.3034 0.2842 0.023 Uiso 1 1 calc R . .
C61 C 0.0973(5) 0.3214(5) 0.3176(3) 0.0181(16) Uani 1 1 d . . .
H61 H 0.1512 0.2589 0.3104 0.022 Uiso 1 1 calc R . .
C62 C 0.3170(5) 0.3739(5) 0.2917(3) 0.0181(16) Uani 1 1 d . . .
C63 C 0.3305(5) 0.4638(5) 0.2751(3) 0.0252(18) Uani 1 1 d . . .
H63 H 0.3080 0.5125 0.3006 0.030 Uiso 1 1 calc R . .
C64 C 0.3765(6) 0.4809(5) 0.2219(3) 0.0292(19) Uani 1 1 d . . .
H64 H 0.3860 0.5414 0.2108 0.035 Uiso 1 1 calc R . .
C65 C 0.4093(5) 0.4105(5) 0.1843(3) 0.0268(18) Uani 1 1 d . . .
H65 H 0.4407 0.4230 0.1475 0.032 Uiso 1 1 calc R . .
C66 C 0.3961(5) 0.3231(5) 0.2003(3) 0.0219(17) Uani 1 1 d . . .
H66 H 0.4187 0.2751 0.1744 0.026 Uiso 1 1 calc R . .
C67 C 0.3506(5) 0.3037(5) 0.2535(3) 0.0192(16) Uani 1 1 d . . .
H67 H 0.3420 0.2425 0.2641 0.023 Uiso 1 1 calc R . .
C68 C 0.3069(5) 0.2280(5) 0.3932(3) 0.0152(15) Uani 1 1 d . . .
C69 C 0.4117(5) 0.1686(5) 0.3865(3) 0.0233(18) Uani 1 1 d . . .
H69 H 0.4545 0.1946 0.3615 0.028 Uiso 1 1 calc R . .
C70 C 0.4540(5) 0.0710(5) 0.4164(3) 0.0261(18) Uani 1 1 d . . .
H70 H 0.5255 0.0298 0.4116 0.031 Uiso 1 1 calc R . .
C71 C 0.3908(5) 0.0342(5) 0.4536(3) 0.0262(19) Uani 1 1 d . . .
H71 H 0.4195 -0.0326 0.4741 0.031 Uiso 1 1 calc R . .
C72 C 0.2867(5) 0.0936(5) 0.4610(3) 0.0250(18) Uani 1 1 d . . .
H72 H 0.2444 0.0679 0.4868 0.030 Uiso 1 1 calc R . .
C73 C 0.2446(5) 0.1900(5) 0.4310(3) 0.0172(16) Uani 1 1 d . . .
H73 H 0.1730 0.2309 0.4360 0.021 Uiso 1 1 calc R . .
C74 C 0.4072(5) 0.3980(5) 0.4701(3) 0.0162(16) Uani 1 1 d . . .
C75 C 0.4788(5) 0.3586(5) 0.4266(3) 0.0267(19) Uani 1 1 d . . .
H75 H 0.4570 0.3548 0.3908 0.032 Uiso 1 1 calc R . .
C76 C 0.5838(5) 0.3245(5) 0.4356(4) 0.0302(19) Uani 1 1 d . . .
H76 H 0.6340 0.2963 0.4062 0.036 Uiso 1 1 calc R . .
C77 C 0.6141(6) 0.3318(5) 0.4870(4) 0.032(2) Uani 1 1 d . . .
H77 H 0.6855 0.3085 0.4930 0.038 Uiso 1 1 calc R . .
C78 C 0.5423(6) 0.3727(5) 0.5305(3) 0.0282(19) Uani 1 1 d . . .
H78 H 0.5642 0.3778 0.5659 0.034 Uiso 1 1 calc R . .
C79 C 0.4399(5) 0.4054(5) 0.5220(3) 0.0205(17) Uani 1 1 d . . .
H79 H 0.3903 0.4336 0.5515 0.025 Uiso 1 1 calc R . .
C80 C 0.2302(5) 0.3570(5) 0.5157(3) 0.0140(11) Uani 1 1 d . . .
C81 C 0.2951(5) 0.2782(5) 0.5534(3) 0.0199(17) Uani 1 1 d . . .
H81 H 0.3662 0.2647 0.5527 0.024 Uiso 1 1 calc R . .
C82 C 0.2563(5) 0.2185(5) 0.5927(3) 0.0257(18) Uani 1 1 d . . .
H82 H 0.3010 0.1641 0.6187 0.031 Uiso 1 1 calc R . .
C83 C 0.1522(5) 0.2381(5) 0.5941(3) 0.0243(18) Uani 1 1 d . . .
H83 H 0.1264 0.1969 0.6209 0.029 Uiso 1 1 calc R . .
C84 C 0.0871(5) 0.3161(5) 0.5572(3) 0.0204(17) Uani 1 1 d . . .
H84 H 0.0159 0.3297 0.5587 0.025 Uiso 1 1 calc R . .
C85 C 0.1248(5) 0.3757(5) 0.5172(3) 0.0184(16) Uani 1 1 d . . .
H85 H 0.0797 0.4292 0.4909 0.022 Uiso 1 1 calc R . .
C86 C 0.2035(5) 0.5639(5) 0.4760(3) 0.0140(11) Uani 1 1 d . . .
C87 C 0.1670(5) 0.5841(5) 0.5315(3) 0.0196(16) Uani 1 1 d . . .
H87 H 0.1778 0.5301 0.5627 0.024 Uiso 1 1 calc R . .
C88 C 0.1146(5) 0.6833(5) 0.5419(3) 0.0213(17) Uani 1 1 d . . .
H88 H 0.0888 0.6977 0.5798 0.026 Uiso 1 1 calc R . .
C89 C 0.1007(5) 0.7605(5) 0.4956(3) 0.0191(17) Uani 1 1 d . . .
H89 H 0.0656 0.8284 0.5023 0.023 Uiso 1 1 calc R . .
C90 C 0.1368(5) 0.7408(5) 0.4403(3) 0.0182(16) Uani 1 1 d . . .
H90 H 0.1264 0.7949 0.4092 0.022 Uiso 1 1 calc R . .
C91 C 0.1876(5) 0.6432(5) 0.4302(3) 0.0189(16) Uani 1 1 d . . .
H91 H 0.2121 0.6295 0.3920 0.023 Uiso 1 1 calc R . .
Cr1 Cr -0.26805(8) 1.04923(8) 0.23662(6) 0.0261(3) Uani 1 1 d . . .
Cr2 Cr 0.32119(8) 0.88277(8) 0.31464(5) 0.0240(3) Uani 1 1 d . . .
Mn1 Mn 0.07051(8) 0.86279(7) 0.23112(5) 0.0169(3) Uani 1 1 d . . .
Mn2 Mn 0.04271(8) 1.06202(7) 0.21710(5) 0.0183(3) Uani 1 1 d . . .
H2' H -0.0133 1.1292 0.2748 0.022 Uiso 1 1 d R . .
Mn3 Mn -0.02361(7) 1.05879(7) 0.33196(5) 0.0168(3) Uani 1 1 d . . .
N1 N 0.7223(4) 0.5689(4) 0.1040(2) 0.0191(14) Uani 1 1 d . . .
N2 N 0.2497(4) 0.4363(4) 0.3971(2) 0.0158(13) Uani 1 1 d . . .
O1 O -0.4824(4) 1.0828(4) 0.2140(3) 0.059(2) Uani 1 1 d . . .
O2 O -0.3364(4) 1.2762(4) 0.2208(3) 0.0526(18) Uani 1 1 d . . .
O3 O -0.1915(4) 1.0683(4) 0.1106(3) 0.0380(15) Uani 1 1 d . . .
O4 O -0.2159(4) 0.8256(4) 0.2487(2) 0.0331(13) Uani 1 1 d . . .
O5 O -0.3154(4) 1.0520(5) 0.3664(3) 0.0518(17) Uani 1 1 d . . .
O6 O 0.2583(4) 0.8865(4) 0.4432(3) 0.0400(15) Uani 1 1 d . . .
O7 O 0.2940(4) 1.0988(4) 0.3058(2) 0.0334(14) Uani 1 1 d . . .
O8 O 0.5386(4) 0.8391(4) 0.3383(3) 0.057(2) Uani 1 1 d . . .
O9 O 0.3603(4) 0.9013(4) 0.1835(3) 0.0445(16) Uani 1 1 d . . .
O10 O 0.3628(4) 0.6622(4) 0.3210(2) 0.0327(13) Uani 1 1 d . . .
O11 O 0.2753(4) 0.7379(4) 0.1825(2) 0.0344(14) Uani 1 1 d . . .
O12 O 0.0610(4) 0.6884(4) 0.3091(2) 0.0353(14) Uani 1 1 d . . .
O13 O -0.0234(4) 0.8275(4) 0.1370(2) 0.0358(14) Uani 1 1 d . . .
O14 O 0.1957(4) 1.1482(4) 0.1940(2) 0.0352(14) Uani 1 1 d . . .
O15 O 0.1201(4) 0.9875(4) 0.1049(2) 0.0398(15) Uani 1 1 d . . .
O16 O -0.1178(4) 1.2426(4) 0.1554(2) 0.0418(15) Uani 1 1 d . . .
O17 O -0.2120(4) 1.2454(4) 0.3389(2) 0.0345(14) Uani 1 1 d . . .
O18 O -0.0930(4) 0.9524(4) 0.4357(2) 0.0323(13) Uani 1 1 d . . .
O19 O 0.0840(3) 1.1215(4) 0.4046(2) 0.0288(13) Uani 1 1 d . . .
P1 P 0.75202(13) 0.61545(13) 0.15083(8) 0.0179(4) Uani 1 1 d . . .
P2 P 0.70837(14) 0.59548(14) 0.03622(8) 0.0202(4) Uani 1 1 d . . .
P3 P 0.24929(13) 0.35814(13) 0.35989(8) 0.0158(4) Uani 1 1 d . . .
P4 P 0.27189(13) 0.43605(13) 0.46117(8) 0.0150(4) Uani 1 1 d . . .
Se1 Se -0.08368(5) 0.99727(5) 0.26178(3) 0.01755(18) Uani 1 1 d . . .
Se2 Se 0.13463(5) 0.92979(5) 0.29540(3) 0.01514(17) Uani 1 1 d . . .
 
loop_
 _atom_site_aniso_label
 _atom_site_aniso_U_11
 _atom_site_aniso_U_22
 _atom_site_aniso_U_33
 _atom_site_aniso_U_23
 _atom_site_aniso_U_13
 _atom_site_aniso_U_12
C1 0.024(5) 0.019(4) 0.086(7) -0.023(4) -0.012(5) -0.002(4)
C2 0.020(4) 0.027(5) 0.059(6) -0.015(4) -0.010(4) -0.005(4)
C3 0.026(5) 0.015(4) 0.049(6) -0.002(4) -0.011(4) -0.007(4)
C4 0.014(4) 0.021(4) 0.037(5) -0.006(4) -0.007(3) -0.001(3)
C5 0.011(4) 0.032(5) 0.059(6) -0.017(4) 0.003(4) -0.013(4)
C6 0.026(5) 0.016(4) 0.042(6) -0.001(4) -0.018(4) -0.005(3)
C7 0.011(4) 0.027(5) 0.044(5) -0.011(4) 0.000(4) -0.007(3)
C8 0.025(5) 0.025(4) 0.075(7) -0.017(4) -0.013(5) -0.006(4)
C9 0.008(4) 0.014(4) 0.050(6) -0.014(4) 0.003(4) -0.002(3)
C10 0.016(4) 0.021(4) 0.042(5) -0.004(4) -0.003(4) -0.004(3)
C11 0.022(4) 0.021(4) 0.029(5) -0.003(3) -0.002(4) -0.014(4)
C12 0.017(4) 0.022(4) 0.029(5) -0.009(4) -0.003(3) -0.005(3)
C13 0.013(4) 0.012(4) 0.029(5) -0.002(3) 0.002(3) 0.002(3)
C14 0.021(4) 0.016(4) 0.035(5) -0.003(3) 0.001(4) -0.007(3)
C15 0.038(5) 0.030(5) 0.030(5) 0.005(4) -0.004(4) -0.023(4)
C16 0.025(4) 0.025(4) 0.034(5) -0.006(4) 0.000(4) -0.015(4)
C17 0.014(4) 0.020(4) 0.033(5) -0.004(3) 0.000(3) -0.009(3)
C18 0.011(3) 0.013(3) 0.030(3) -0.011(2) 0.002(2) 0.001(2)
C19 0.011(3) 0.013(3) 0.030(3) -0.011(2) 0.002(2) 0.001(2)
C20 0.017(4) 0.023(4) 0.019(4) 0.000(3) -0.003(3) -0.007(3)
C21 0.011(4) 0.022(4) 0.024(4) -0.003(3) -0.001(3) -0.001(3)
C22 0.018(4) 0.037(5) 0.024(5) -0.001(4) -0.004(3) -0.016(4)
C23 0.010(4) 0.037(5) 0.028(5) 0.006(4) -0.008(3) -0.002(4)
C24 0.016(4) 0.022(4) 0.027(5) -0.004(3) 0.000(3) 0.008(3)
C25 0.021(4) 0.016(4) 0.028(5) -0.002(3) -0.002(3) -0.005(3)
C26 0.007(3) 0.013(3) 0.026(4) -0.005(3) -0.002(3) 0.000(3)
C27 0.023(4) 0.022(4) 0.030(5) -0.010(3) 0.001(3) -0.013(3)
C28 0.026(4) 0.026(4) 0.031(5) -0.007(4) 0.003(4) -0.016(4)
C29 0.021(4) 0.026(4) 0.026(5) -0.004(3) 0.006(3) -0.009(3)
C30 0.020(4) 0.020(4) 0.030(5) -0.011(3) 0.004(4) -0.005(3)
C31 0.015(4) 0.011(4) 0.029(5) -0.006(3) 0.004(3) -0.004(3)
C32 0.019(4) 0.011(4) 0.027(5) -0.002(3) -0.005(3) -0.004(3)
C33 0.019(4) 0.009(4) 0.048(5) -0.005(3) -0.005(4) -0.005(3)
C34 0.024(5) 0.023(4) 0.068(7) -0.006(4) -0.009(4) -0.007(4)
C35 0.036(5) 0.015(4) 0.042(6) 0.003(4) -0.011(4) -0.009(4)
C36 0.036(5) 0.022(4) 0.038(5) -0.005(4) -0.002(4) -0.016(4)
C37 0.020(4) 0.023(4) 0.028(5) -0.009(3) 0.003(3) -0.010(3)
C38 0.013(4) 0.022(4) 0.031(5) -0.003(3) -0.008(3) -0.004(3)
C39 0.026(5) 0.049(5) 0.027(5) -0.002(4) -0.005(4) -0.015(4)
C40 0.018(4) 0.057(6) 0.040(6) -0.010(4) 0.000(4) -0.013(4)
C41 0.014(4) 0.034(5) 0.052(6) -0.001(4) -0.010(4) -0.014(4)
C42 0.031(5) 0.041(5) 0.027(5) -0.003(4) -0.009(4) -0.012(4)
C43 0.028(5) 0.032(5) 0.035(5) -0.005(4) -0.002(4) -0.014(4)
C44 0.016(4) 0.022(4) 0.022(4) -0.010(3) 0.000(3) -0.007(3)
C45 0.021(4) 0.021(4) 0.035(5) -0.006(4) -0.003(4) -0.010(3)
C46 0.047(5) 0.020(4) 0.029(5) -0.005(3) -0.002(4) -0.016(4)
C47 0.035(5) 0.035(5) 0.041(6) -0.012(4) 0.008(4) -0.021(4)
C48 0.024(4) 0.030(5) 0.043(5) -0.014(4) 0.008(4) -0.015(4)
C49 0.022(4) 0.022(4) 0.024(5) -0.008(3) 0.009(3) -0.010(3)
C50 0.017(4) 0.029(4) 0.019(4) -0.003(3) -0.002(3) -0.010(3)
C51 0.028(5) 0.033(5) 0.035(5) -0.003(4) 0.003(4) -0.016(4)
C52 0.048(6) 0.035(5) 0.037(5) -0.018(4) 0.013(4) -0.025(4)
C53 0.045(5) 0.034(5) 0.035(6) -0.017(4) 0.010(4) -0.024(4)
C54 0.035(5) 0.027(4) 0.036(5) -0.005(4) -0.002(4) -0.021(4)
C55 0.020(4) 0.027(4) 0.026(5) -0.007(4) 0.001(3) -0.014(3)
C56 0.005(3) 0.010(3) 0.020(4) -0.002(3) 0.001(3) 0.000(3)
C57 0.020(4) 0.024(4) 0.015(4) -0.004(3) 0.001(3) -0.010(3)
C58 0.005(3) 0.015(4) 0.026(4) -0.002(3) 0.004(3) 0.000(3)
C59 0.010(4) 0.026(4) 0.026(5) 0.002(3) -0.001(3) -0.008(3)
C60 0.016(4) 0.022(4) 0.026(4) -0.004(3) -0.006(3) -0.012(3)
C61 0.016(4) 0.018(4) 0.019(4) -0.002(3) -0.002(3) -0.005(3)
C62 0.005(3) 0.017(4) 0.029(5) -0.007(3) -0.003(3) 0.001(3)
C63 0.023(4) 0.018(4) 0.032(5) -0.013(3) 0.010(4) -0.005(3)
C64 0.028(5) 0.025(4) 0.034(5) -0.003(4) 0.006(4) -0.014(4)
C65 0.024(4) 0.032(4) 0.018(4) -0.003(3) 0.006(3) -0.007(4)
C66 0.013(4) 0.020(4) 0.028(5) -0.010(3) 0.000(3) 0.000(3)
C67 0.018(4) 0.018(4) 0.020(4) -0.001(3) -0.003(3) -0.006(3)
C68 0.006(3) 0.019(4) 0.020(4) -0.008(3) 0.002(3) -0.004(3)
C69 0.010(4) 0.018(4) 0.039(5) -0.007(3) -0.002(3) -0.001(3)
C70 0.008(4) 0.018(4) 0.045(5) -0.010(4) 0.001(3) 0.004(3)
C71 0.022(4) 0.015(4) 0.039(5) -0.001(3) -0.012(4) -0.004(3)
C72 0.023(4) 0.019(4) 0.035(5) -0.003(3) -0.008(4) -0.010(3)
C73 0.009(4) 0.014(4) 0.023(4) -0.006(3) 0.000(3) 0.001(3)
C74 0.008(4) 0.019(4) 0.024(4) -0.002(3) 0.001(3) -0.008(3)
C75 0.017(4) 0.023(4) 0.042(5) -0.013(4) 0.001(4) -0.008(3)
C76 0.011(4) 0.024(4) 0.052(6) -0.006(4) 0.009(4) -0.007(3)
C77 0.012(4) 0.032(5) 0.050(6) 0.010(4) -0.013(4) -0.012(4)
C78 0.022(4) 0.027(4) 0.040(5) 0.001(4) -0.012(4) -0.013(4)
C79 0.014(4) 0.021(4) 0.026(5) -0.003(3) -0.004(3) -0.006(3)
C80 0.006(2) 0.013(2) 0.023(3) -0.008(2) 0.004(2) -0.003(2)
C81 0.011(4) 0.022(4) 0.032(5) -0.004(3) -0.003(3) -0.011(3)
C82 0.025(4) 0.020(4) 0.034(5) -0.002(3) -0.005(4) -0.011(3)
C83 0.023(4) 0.022(4) 0.036(5) -0.006(4) 0.005(4) -0.017(4)
C84 0.010(4) 0.024(4) 0.030(5) -0.008(3) 0.005(3) -0.010(3)
C85 0.013(4) 0.013(4) 0.026(5) -0.008(3) 0.002(3) 0.000(3)
C86 0.006(2) 0.013(2) 0.023(3) -0.008(2) 0.004(2) -0.003(2)
C87 0.009(4) 0.023(4) 0.021(4) 0.000(3) 0.003(3) -0.003(3)
C88 0.019(4) 0.020(4) 0.023(4) -0.010(3) 0.004(3) -0.005(3)
C89 0.007(3) 0.012(4) 0.037(5) -0.011(3) 0.004(3) -0.001(3)
C90 0.006(3) 0.017(4) 0.031(5) -0.004(3) 0.000(3) -0.005(3)
C91 0.002(3) 0.021(4) 0.032(5) -0.008(3) 0.002(3) -0.002(3)
Cr1 0.0111(6) 0.0174(6) 0.0501(9) -0.0116(6) -0.0065(6) -0.0021(5)
Cr2 0.0099(6) 0.0180(6) 0.0428(9) -0.0079(6) -0.0042(6) -0.0026(5)
Mn1 0.0117(6) 0.0127(5) 0.0257(7) -0.0062(5) 0.0006(5) -0.0036(5)
Mn2 0.0127(6) 0.0147(5) 0.0269(7) -0.0056(5) -0.0005(5) -0.0041(5)
Mn3 0.0083(5) 0.0152(6) 0.0266(7) -0.0072(5) 0.0014(5) -0.0033(5)
N1 0.021(3) 0.016(3) 0.021(4) -0.001(3) -0.004(3) -0.008(3)
N2 0.012(3) 0.010(3) 0.023(4) -0.004(2) 0.001(3) -0.004(2)
O1 0.017(3) 0.035(3) 0.125(6) -0.035(4) -0.021(4) 0.001(3)
O2 0.035(4) 0.021(3) 0.100(5) -0.021(3) -0.018(3) -0.001(3)
O3 0.046(4) 0.028(3) 0.048(4) -0.001(3) -0.015(3) -0.021(3)
O4 0.031(3) 0.022(3) 0.049(4) -0.013(3) 0.004(3) -0.012(3)
O5 0.029(4) 0.071(5) 0.065(5) -0.026(4) 0.014(3) -0.027(3)
O6 0.060(4) 0.031(3) 0.038(4) -0.003(3) -0.010(3) -0.026(3)
O7 0.034(3) 0.023(3) 0.043(4) -0.009(3) -0.005(3) -0.009(3)
O8 0.021(3) 0.032(3) 0.119(6) -0.021(4) -0.025(4) -0.003(3)
O9 0.041(4) 0.047(4) 0.047(4) -0.017(3) 0.014(3) -0.020(3)
O10 0.025(3) 0.020(3) 0.051(4) -0.004(3) -0.003(3) -0.007(2)
O11 0.016(3) 0.028(3) 0.054(4) -0.018(3) 0.014(3) -0.004(3)
O12 0.042(4) 0.028(3) 0.040(4) 0.001(3) -0.004(3) -0.021(3)
O13 0.030(3) 0.038(3) 0.043(4) -0.020(3) -0.008(3) -0.010(3)
O14 0.032(3) 0.037(3) 0.038(4) 0.003(3) -0.003(3) -0.020(3)
O15 0.062(4) 0.029(3) 0.026(4) -0.004(3) 0.011(3) -0.020(3)
O16 0.034(3) 0.026(3) 0.053(4) 0.008(3) -0.015(3) -0.003(3)
O17 0.012(3) 0.023(3) 0.058(4) -0.015(3) 0.004(3) 0.004(2)
O18 0.019(3) 0.032(3) 0.038(4) 0.000(3) 0.008(3) -0.008(2)
O19 0.016(3) 0.040(3) 0.037(3) -0.019(3) 0.002(2) -0.013(2)
P1 0.0111(9) 0.0163(9) 0.0256(12) -0.0035(8) -0.0019(8) -0.0046(8)
P2 0.0158(10) 0.0215(10) 0.0237(12) -0.0032(8) -0.0011(8) -0.0082(8)
P3 0.0074(9) 0.0155(9) 0.0236(11) -0.0064(8) -0.0012(8) -0.0023(7)
P4 0.0051(9) 0.0149(9) 0.0243(11) -0.0072(8) 0.0001(8) -0.0020(7)
Se1 0.0079(4) 0.0149(4) 0.0293(5) -0.0069(3) -0.0015(3) -0.0027(3)
Se2 0.0063(3) 0.0129(4) 0.0254(5) -0.0064(3) 0.0011(3) -0.0022(3)
 
_geom_special_details
;
 All esds (except the esd in the dihedral angle between two l.s. planes)
 are estimated using the full covariance matrix.  The cell esds are taken
 into account individually in the estimation of esds in distances, angles
 and torsion angles; correlations between esds in cell parameters are only
 used when they are defined by crystal symmetry.  An approximate (isotropic)
 treatment of cell esds is used for estimating esds involving l.s. planes.
;
 
loop_
 _geom_bond_atom_site_label_1
 _geom_bond_atom_site_label_2
 _geom_bond_distance
 _geom_bond_site_symmetry_2
 _geom_bond_publ_flag
C1 O1 1.156(9) . ?
C1 Cr1 1.840(8) . ?
C2 O2 1.127(8) . ?
C2 Cr1 1.916(8) . ?
C3 O3 1.164(9) . ?
C3 Cr1 1.875(10) . ?
C4 O4 1.137(8) . ?
C4 Cr1 1.901(7) . ?
C5 O5 1.163(9) . ?
C5 Cr1 1.885(10) . ?
C6 O6 1.161(9) . ?
C6 Cr2 1.890(9) . ?
C7 O7 1.145(8) . ?
C7 Cr2 1.887(8) . ?
C8 O8 1.155(8) . ?
C8 Cr2 1.848(8) . ?
C9 O9 1.161(9) . ?
C9 Cr2 1.886(9) . ?
C10 O10 1.161(8) . ?
C10 Cr2 1.884(7) . ?
C11 O11 1.147(8) . ?
C11 Mn1 1.807(8) . ?
C12 O12 1.166(8) . ?
C12 Mn1 1.754(8) . ?
C13 O13 1.151(7) . ?
C13 Mn1 1.806(7) . ?
C14 O14 1.145(8) . ?
C14 Mn2 1.788(8) . ?
C15 O15 1.166(9) . ?
C15 Mn2 1.810(9) . ?
C16 O16 1.148(8) . ?
C16 Mn2 1.793(8) . ?
C17 O17 1.144(7) . ?
C17 Mn3 1.803(7) . ?
C18 O18 1.179(8) . ?
C18 Mn3 1.776(8) . ?
C19 O19 1.151(7) . ?
C19 Mn3 1.787(7) . ?
C20 C25 1.363(9) . ?
C20 C21 1.396(9) . ?
C20 P1 1.806(7) . ?
C21 C22 1.382(9) . ?
C21 H21 0.9500 . ?
C22 C23 1.384(10) . ?
C22 H22 0.9500 . ?
C23 C24 1.375(9) . ?
C23 H23 0.9500 . ?
C24 C25 1.400(9) . ?
C24 H24 0.9500 . ?
C25 H25 0.9500 . ?
C26 C31 1.398(8) . ?
C26 C27 1.404(9) . ?
C26 P1 1.783(7) . ?
C27 C28 1.367(10) . ?
C27 H27 0.9500 . ?
C28 C29 1.378(9) . ?
C28 H28 0.9500 . ?
C29 C30 1.395(9) . ?
C29 H29 0.9500 . ?
C30 C31 1.369(10) . ?
C30 H30 0.9500 . ?
C31 H31 0.9500 . ?
C32 C37 1.398(10) . ?
C32 C33 1.402(9) . ?
C32 P1 1.795(6) . ?
C33 C34 1.386(9) . ?
C33 H33 0.9500 . ?
C34 C35 1.367(11) . ?
C34 H34 0.9500 . ?
C35 C36 1.372(10) . ?
C35 H35 0.9500 . ?
C36 C37 1.378(9) . ?
C36 H36 0.9500 . ?
C37 H37 0.9500 . ?
C38 C39 1.369(10) . ?
C38 C43 1.385(9) . ?
C38 P2 1.806(7) . ?
C39 C40 1.393(10) . ?
C39 H39 0.9500 . ?
C40 C41 1.383(10) . ?
C40 H40 0.9500 . ?
C41 C42 1.376(10) . ?
C41 H41 0.9500 . ?
C42 C43 1.379(10) . ?
C42 H42 0.9500 . ?
C43 H43 0.9500 . ?
C44 C49 1.394(9) . ?
C44 C45 1.395(9) . ?
C44 P2 1.797(7) . ?
C45 C46 1.396(10) . ?
C45 H45 0.9500 . ?
C46 C47 1.376(10) . ?
C46 H46 0.9500 . ?
C47 C48 1.379(10) . ?
C47 H47 0.9500 . ?
C48 C49 1.394(10) . ?
C48 H48 0.9500 . ?
C49 H49 0.9500 . ?
C50 C55 1.391(9) . ?
C50 C51 1.397(10) . ?
C50 P2 1.790(7) . ?
C51 C52 1.386(10) . ?
C51 H51 0.9500 . ?
C52 C53 1.384(11) . ?
C52 H52 0.9500 . ?
C53 C54 1.380(10) . ?
C53 H53 0.9500 . ?
C54 C55 1.380(9) . ?
C54 H54 0.9500 . ?
C55 H55 0.9500 . ?
C56 C57 1.378(8) . ?
C56 C61 1.397(8) . ?
C56 P3 1.815(6) . ?
C57 C58 1.386(9) . ?
C57 H57 0.9500 . ?
C58 C59 1.377(9) . ?
C58 H58 0.9500 . ?
C59 C60 1.385(9) . ?
C59 H59 0.9500 . ?
C60 C61 1.372(8) . ?
C60 H60 0.9500 . ?
C61 H61 0.9500 . ?
C62 C67 1.397(9) . ?
C62 C63 1.407(9) . ?
C62 P3 1.800(7) . ?
C63 C64 1.374(10) . ?
C63 H63 0.9500 . ?
C64 C65 1.387(9) . ?
C64 H64 0.9500 . ?
C65 C66 1.366(10) . ?
C65 H65 0.9500 . ?
C66 C67 1.379(9) . ?
C66 H66 0.9500 . ?
C67 H67 0.9500 . ?
C68 C69 1.389(8) . ?
C68 C73 1.399(9) . ?
C68 P3 1.802(7) . ?
C69 C70 1.388(9) . ?
C69 H69 0.9500 . ?
C70 C71 1.392(10) . ?
C70 H70 0.9500 . ?
C71 C72 1.382(9) . ?
C71 H71 0.9500 . ?
C72 C73 1.377(9) . ?
C72 H72 0.9500 . ?
C73 H73 0.9500 . ?
C74 C75 1.380(9) . ?
C74 C79 1.396(9) . ?
C74 P4 1.802(6) . ?
C75 C76 1.398(9) . ?
C75 H75 0.9500 . ?
C76 C77 1.370(10) . ?
C76 H76 0.9500 . ?
C77 C78 1.387(10) . ?
C77 H77 0.9500 . ?
C78 C79 1.364(9) . ?
C78 H78 0.9500 . ?
C79 H79 0.9500 . ?
C80 C81 1.377(9) . ?
C80 C85 1.413(9) . ?
C80 P4 1.795(7) . ?
C81 C82 1.391(10) . ?
C81 H81 0.9500 . ?
C82 C83 1.391(9) . ?
C82 H82 0.9500 . ?
C83 C84 1.362(9) . ?
C83 H83 0.9500 . ?
C84 C85 1.388(9) . ?
C84 H84 0.9500 . ?
C85 H85 0.9500 . ?
C86 C87 1.383(9) . ?
C86 C91 1.396(9) . ?
C86 P4 1.807(6) . ?
C87 C88 1.393(9) . ?
C87 H87 0.9500 . ?
C88 C89 1.385(9) . ?
C88 H88 0.9500 . ?
C89 C90 1.377(9) . ?
C89 H89 0.9500 . ?
C90 C91 1.370(9) . ?
C90 H90 0.9500 . ?
C91 H91 0.9500 . ?
Cr1 Se1 2.5299(12) . ?
Cr2 Se2 2.5357(12) . ?
Mn1 Se1 2.4067(12) . ?
Mn1 Se2 2.4079(12) . ?
Mn1 Mn2 2.7698(14) . ?
Mn2 Se1 2.4416(13) . ?
Mn2 Se2 2.4459(12) . ?
Mn2 Mn3 2.7501(16) . ?
Mn2 H2' 1.7450 . ?
Mn3 Se1 2.4243(12) . ?
Mn3 Se2 2.4504(12) . ?
Mn3 H2' 1.5717 . ?
N1 P2 1.582(6) . ?
N1 P1 1.587(5) . ?
N2 P4 1.575(5) . ?
N2 P3 1.581(5) . ?
 
loop_
 _geom_angle_atom_site_label_1
 _geom_angle_atom_site_label_2
 _geom_angle_atom_site_label_3
 _geom_angle
 _geom_angle_site_symmetry_1
 _geom_angle_site_symmetry_3
 _geom_angle_publ_flag
O1 C1 Cr1 177.8(8) . . ?
O2 C2 Cr1 175.9(7) . . ?
O3 C3 Cr1 175.5(6) . . ?
O4 C4 Cr1 178.8(6) . . ?
O5 C5 Cr1 178.4(7) . . ?
O6 C6 Cr2 177.9(6) . . ?
O7 C7 Cr2 175.2(6) . . ?
O8 C8 Cr2 176.8(7) . . ?
O9 C9 Cr2 178.3(7) . . ?
O10 C10 Cr2 178.7(7) . . ?
O11 C11 Mn1 178.0(6) . . ?
O12 C12 Mn1 178.2(6) . . ?
O13 C13 Mn1 177.1(6) . . ?
O14 C14 Mn2 177.5(7) . . ?
O15 C15 Mn2 167.9(7) . . ?
O16 C16 Mn2 178.8(7) . . ?
O17 C17 Mn3 177.7(7) . . ?
O18 C18 Mn3 177.8(6) . . ?
O19 C19 Mn3 177.0(7) . . ?
C25 C20 C21 120.2(6) . . ?
C25 C20 P1 119.4(5) . . ?
C21 C20 P1 120.3(5) . . ?
C22 C21 C20 119.7(6) . . ?
C22 C21 H21 120.2 . . ?
C20 C21 H21 120.2 . . ?
C21 C22 C23 119.8(6) . . ?
C21 C22 H22 120.1 . . ?
C23 C22 H22 120.1 . . ?
C24 C23 C22 120.6(6) . . ?
C24 C23 H23 119.7 . . ?
C22 C23 H23 119.7 . . ?
C23 C24 C25 119.4(6) . . ?
C23 C24 H24 120.3 . . ?
C25 C24 H24 120.3 . . ?
C20 C25 C24 120.3(7) . . ?
C20 C25 H25 119.9 . . ?
C24 C25 H25 119.9 . . ?
C31 C26 C27 118.3(7) . . ?
C31 C26 P1 121.4(5) . . ?
C27 C26 P1 120.0(5) . . ?
C28 C27 C26 121.2(6) . . ?
C28 C27 H27 119.4 . . ?
C26 C27 H27 119.4 . . ?
C27 C28 C29 119.9(7) . . ?
C27 C28 H28 120.0 . . ?
C29 C28 H28 120.0 . . ?
C28 C29 C30 119.8(7) . . ?
C28 C29 H29 120.1 . . ?
C30 C29 H29 120.1 . . ?
C31 C30 C29 120.6(7) . . ?
C31 C30 H30 119.7 . . ?
C29 C30 H30 119.7 . . ?
C30 C31 C26 120.2(6) . . ?
C30 C31 H31 119.9 . . ?
C26 C31 H31 119.9 . . ?
C37 C32 C33 119.4(6) . . ?
C37 C32 P1 121.3(5) . . ?
C33 C32 P1 119.0(5) . . ?
C34 C33 C32 119.3(7) . . ?
C34 C33 H33 120.3 . . ?
C32 C33 H33 120.3 . . ?
C35 C34 C33 120.1(7) . . ?
C35 C34 H34 119.9 . . ?
C33 C34 H34 119.9 . . ?
C34 C35 C36 121.5(7) . . ?
C34 C35 H35 119.3 . . ?
C36 C35 H35 119.3 . . ?
C35 C36 C37 119.6(8) . . ?
C35 C36 H36 120.2 . . ?
C37 C36 H36 120.2 . . ?
C36 C37 C32 120.2(7) . . ?
C36 C37 H37 119.9 . . ?
C32 C37 H37 119.9 . . ?
C39 C38 C43 119.5(7) . . ?
C39 C38 P2 119.8(5) . . ?
C43 C38 P2 120.5(6) . . ?
C38 C39 C40 121.1(7) . . ?
C38 C39 H39 119.5 . . ?
C40 C39 H39 119.5 . . ?
C41 C40 C39 118.8(8) . . ?
C41 C40 H40 120.6 . . ?
C39 C40 H40 120.6 . . ?
C42 C41 C40 120.3(7) . . ?
C42 C41 H41 119.9 . . ?
C40 C41 H41 119.9 . . ?
C41 C42 C43 120.4(7) . . ?
C41 C42 H42 119.8 . . ?
C43 C42 H42 119.8 . . ?
C42 C43 C38 120.0(7) . . ?
C42 C43 H43 120.0 . . ?
C38 C43 H43 120.0 . . ?
C49 C44 C45 119.4(7) . . ?
C49 C44 P2 117.1(5) . . ?
C45 C44 P2 123.2(5) . . ?
C44 C45 C46 119.1(7) . . ?
C44 C45 H45 120.4 . . ?
C46 C45 H45 120.4 . . ?
C47 C46 C45 121.1(7) . . ?
C47 C46 H46 119.4 . . ?
C45 C46 H46 119.4 . . ?
C46 C47 C48 120.1(8) . . ?
C46 C47 H47 119.9 . . ?
C48 C47 H47 119.9 . . ?
C47 C48 C49 119.7(7) . . ?
C47 C48 H48 120.2 . . ?
C49 C48 H48 120.2 . . ?
C48 C49 C44 120.6(7) . . ?
C48 C49 H49 119.7 . . ?
C44 C49 H49 119.7 . . ?
C55 C50 C51 119.1(7) . . ?
C55 C50 P2 119.9(6) . . ?
C51 C50 P2 121.0(6) . . ?
C52 C51 C50 120.2(7) . . ?
C52 C51 H51 119.9 . . ?
C50 C51 H51 119.9 . . ?
C53 C52 C51 119.9(8) . . ?
C53 C52 H52 120.1 . . ?
C51 C52 H52 120.1 . . ?
C54 C53 C52 120.1(7) . . ?
C54 C53 H53 120.0 . . ?
C52 C53 H53 120.0 . . ?
C53 C54 C55 120.4(7) . . ?
C53 C54 H54 119.8 . . ?
C55 C54 H54 119.8 . . ?
C54 C55 C50 120.2(7) . . ?
C54 C55 H55 119.9 . . ?
C50 C55 H55 119.9 . . ?
C57 C56 C61 120.7(6) . . ?
C57 C56 P3 119.4(5) . . ?
C61 C56 P3 119.9(5) . . ?
C56 C57 C58 119.5(6) . . ?
C56 C57 H57 120.2 . . ?
C58 C57 H57 120.2 . . ?
C59 C58 C57 119.9(6) . . ?
C59 C58 H58 120.0 . . ?
C57 C58 H58 120.0 . . ?
C58 C59 C60 120.4(6) . . ?
C58 C59 H59 119.8 . . ?
C60 C59 H59 119.8 . . ?
C61 C60 C59 120.3(6) . . ?
C61 C60 H60 119.9 . . ?
C59 C60 H60 119.9 . . ?
C60 C61 C56 119.2(6) . . ?
C60 C61 H61 120.4 . . ?
C56 C61 H61 120.4 . . ?
C67 C62 C63 119.0(7) . . ?
C67 C62 P3 122.8(5) . . ?
C63 C62 P3 118.1(5) . . ?
C64 C63 C62 119.6(6) . . ?
C64 C63 H63 120.2 . . ?
C62 C63 H63 120.2 . . ?
C63 C64 C65 120.7(7) . . ?
C63 C64 H64 119.7 . . ?
C65 C64 H64 119.7 . . ?
C66 C65 C64 119.8(7) . . ?
C66 C65 H65 120.1 . . ?
C64 C65 H65 120.1 . . ?
C65 C66 C67 120.9(6) . . ?
C65 C66 H66 119.6 . . ?
C67 C66 H66 119.6 . . ?
C66 C67 C62 120.0(7) . . ?
C66 C67 H67 120.0 . . ?
C62 C67 H67 120.0 . . ?
C69 C68 C73 119.8(6) . . ?
C69 C68 P3 122.0(5) . . ?
C73 C68 P3 117.9(5) . . ?
C70 C69 C68 120.0(7) . . ?
C70 C69 H69 120.0 . . ?
C68 C69 H69 120.0 . . ?
C69 C70 C71 119.5(6) . . ?
C69 C70 H70 120.3 . . ?
C71 C70 H70 120.3 . . ?
C72 C71 C70 120.7(7) . . ?
C72 C71 H71 119.6 . . ?
C70 C71 H71 119.6 . . ?
C73 C72 C71 119.8(7) . . ?
C73 C72 H72 120.1 . . ?
C71 C72 H72 120.1 . . ?
C72 C73 C68 120.2(6) . . ?
C72 C73 H73 119.9 . . ?
C68 C73 H73 119.9 . . ?
C75 C74 C79 119.9(6) . . ?
C75 C74 P4 120.3(5) . . ?
C79 C74 P4 119.8(5) . . ?
C74 C75 C76 119.4(7) . . ?
C74 C75 H75 120.3 . . ?
C76 C75 H75 120.3 . . ?
C77 C76 C75 119.6(7) . . ?
C77 C76 H76 120.2 . . ?
C75 C76 H76 120.2 . . ?
C76 C77 C78 121.2(7) . . ?
C76 C77 H77 119.4 . . ?
C78 C77 H77 119.4 . . ?
C79 C78 C77 119.2(7) . . ?
C79 C78 H78 120.4 . . ?
C77 C78 H78 120.4 . . ?
C78 C79 C74 120.7(7) . . ?
C78 C79 H79 119.7 . . ?
C74 C79 H79 119.7 . . ?
C81 C80 C85 119.4(6) . . ?
C81 C80 P4 124.0(5) . . ?
C85 C80 P4 116.6(5) . . ?
C80 C81 C82 119.8(6) . . ?
C80 C81 H81 120.1 . . ?
C82 C81 H81 120.1 . . ?
C81 C82 C83 120.3(7) . . ?
C81 C82 H82 119.8 . . ?
C83 C82 H82 119.8 . . ?
C84 C83 C82 120.5(7) . . ?
C84 C83 H83 119.8 . . ?
C82 C83 H83 119.8 . . ?
C83 C84 C85 120.0(6) . . ?
C83 C84 H84 120.0 . . ?
C85 C84 H84 120.0 . . ?
C84 C85 C80 120.1(6) . . ?
C84 C85 H85 120.0 . . ?
C80 C85 H85 120.0 . . ?
C87 C86 C91 119.9(6) . . ?
C87 C86 P4 121.3(5) . . ?
C91 C86 P4 118.7(5) . . ?
C86 C87 C88 120.3(7) . . ?
C86 C87 H87 119.9 . . ?
C88 C87 H87 119.9 . . ?
C89 C88 C87 118.6(7) . . ?
C89 C88 H88 120.7 . . ?
C87 C88 H88 120.7 . . ?
C90 C89 C88 121.4(6) . . ?
C90 C89 H89 119.3 . . ?
C88 C89 H89 119.3 . . ?
C91 C90 C89 119.9(7) . . ?
C91 C90 H90 120.0 . . ?
C89 C90 H90 120.0 . . ?
C90 C91 C86 119.9(7) . . ?
C90 C91 H91 120.0 . . ?
C86 C91 H91 120.0 . . ?
C1 Cr1 C3 95.4(4) . . ?
C1 Cr1 C5 93.1(4) . . ?
C3 Cr1 C5 169.9(3) . . ?
C1 Cr1 C4 87.4(3) . . ?
C3 Cr1 C4 93.4(3) . . ?
C5 Cr1 C4 92.4(3) . . ?
C1 Cr1 C2 90.0(3) . . ?
C3 Cr1 C2 86.7(3) . . ?
C5 Cr1 C2 87.9(3) . . ?
C4 Cr1 C2 177.3(3) . . ?
C1 Cr1 Se1 173.2(3) . . ?
C3 Cr1 Se1 87.3(2) . . ?
C5 Cr1 Se1 84.9(2) . . ?
C4 Cr1 Se1 86.2(2) . . ?
C2 Cr1 Se1 96.5(2) . . ?
C8 Cr2 C10 93.6(3) . . ?
C8 Cr2 C9 93.4(4) . . ?
C10 Cr2 C9 90.1(3) . . ?
C8 Cr2 C7 85.3(3) . . ?
C10 Cr2 C7 178.2(4) . . ?
C9 Cr2 C7 88.5(3) . . ?
C8 Cr2 C6 91.3(4) . . ?
C10 Cr2 C6 92.9(3) . . ?
C9 Cr2 C6 174.2(3) . . ?
C7 Cr2 C6 88.5(3) . . ?
C8 Cr2 Se2 178.0(2) . . ?
C10 Cr2 Se2 88.3(2) . . ?
C9 Cr2 Se2 87.0(2) . . ?
C7 Cr2 Se2 92.8(2) . . ?
C6 Cr2 Se2 88.2(2) . . ?
C12 Mn1 C13 92.3(3) . . ?
C12 Mn1 C11 92.7(3) . . ?
C13 Mn1 C11 90.0(3) . . ?
C12 Mn1 Se1 100.8(2) . . ?
C13 Mn1 Se1 95.0(2) . . ?
C11 Mn1 Se1 165.4(2) . . ?
C12 Mn1 Se2 100.4(2) . . ?
C13 Mn1 Se2 166.1(2) . . ?
C11 Mn1 Se2 94.9(2) . . ?
Se1 Mn1 Se2 77.35(4) . . ?
C12 Mn1 Mn2 147.6(2) . . ?
C13 Mn1 Mn2 110.3(2) . . ?
C11 Mn1 Mn2 109.6(2) . . ?
Se1 Mn1 Mn2 55.75(3) . . ?
Se2 Mn1 Mn2 55.85(3) . . ?
C14 Mn2 C16 93.9(3) . . ?
C14 Mn2 C15 89.0(3) . . ?
C16 Mn2 C15 91.4(3) . . ?
C14 Mn2 Se1 164.6(2) . . ?
C16 Mn2 Se1 91.9(2) . . ?
C15 Mn2 Se1 105.1(2) . . ?
C14 Mn2 Se2 94.6(2) . . ?
C16 Mn2 Se2 161.2(3) . . ?
C15 Mn2 Se2 105.5(2) . . ?
Se1 Mn2 Se2 75.98(4) . . ?
C14 Mn2 Mn3 109.4(2) . . ?
C16 Mn2 Mn3 105.4(2) . . ?
C15 Mn2 Mn3 153.7(2) . . ?
Se1 Mn2 Mn3 55.29(4) . . ?
Se2 Mn2 Mn3 55.91(3) . . ?
C14 Mn2 Mn1 129.1(2) . . ?
C16 Mn2 Mn1 128.9(2) . . ?
C15 Mn2 Mn1 66.9(2) . . ?
Se1 Mn2 Mn1 54.57(3) . . ?
Se2 Mn2 Mn1 54.56(3) . . ?
Mn3 Mn2 Mn1 86.84(4) . . ?
C14 Mn2 H2' 90.9 . . ?
C16 Mn2 H2' 81.0 . . ?
C15 Mn2 H2' 172.4 . . ?
Se1 Mn2 H2' 75.9 . . ?
Se2 Mn2 H2' 82.0 . . ?
Mn3 Mn2 H2' 32.0 . . ?
Mn1 Mn2 H2' 118.5 . . ?
C18 Mn3 C19 91.6(3) . . ?
C18 Mn3 C17 91.5(3) . . ?
C19 Mn3 C17 91.8(3) . . ?
C18 Mn3 Se1 96.0(2) . . ?
C19 Mn3 Se1 168.8(2) . . ?
C17 Mn3 Se1 96.2(2) . . ?
C18 Mn3 Se2 104.4(2) . . ?
C19 Mn3 Se2 93.9(2) . . ?
C17 Mn3 Se2 162.9(2) . . ?
Se1 Mn3 Se2 76.22(4) . . ?
C18 Mn3 Mn2 146.9(2) . . ?
C19 Mn3 Mn2 114.1(2) . . ?
C17 Mn3 Mn2 107.3(2) . . ?
Se1 Mn3 Mn2 55.88(4) . . ?
Se2 Mn3 Mn2 55.75(3) . . ?
C18 Mn3 H2' 168.0 . . ?
C19 Mn3 H2' 94.7 . . ?
C17 Mn3 H2' 78.1 . . ?
Se1 Mn3 H2' 79.3 . . ?
Se2 Mn3 H2' 85.3 . . ?
Mn2 Mn3 H2' 36.1 . . ?
P2 N1 P1 135.3(4) . . ?
P4 N2 P3 137.5(4) . . ?
N1 P1 C26 107.2(3) . . ?
N1 P1 C32 114.2(3) . . ?
C26 P1 C32 108.8(3) . . ?
N1 P1 C20 110.9(3) . . ?
C26 P1 C20 106.5(3) . . ?
C32 P1 C20 108.9(3) . . ?
N1 P2 C50 107.6(3) . . ?
N1 P2 C44 113.9(3) . . ?
C50 P2 C44 107.6(3) . . ?
N1 P2 C38 111.1(3) . . ?
C50 P2 C38 109.0(3) . . ?
C44 P2 C38 107.5(3) . . ?
N2 P3 C62 107.5(3) . . ?
N2 P3 C68 115.1(3) . . ?
C62 P3 C68 109.2(3) . . ?
N2 P3 C56 109.9(3) . . ?
C62 P3 C56 106.8(3) . . ?
C68 P3 C56 108.0(3) . . ?
N2 P4 C80 114.9(3) . . ?
N2 P4 C74 111.8(3) . . ?
C80 P4 C74 107.2(3) . . ?
N2 P4 C86 107.2(3) . . ?
C80 P4 C86 107.6(3) . . ?
C74 P4 C86 107.9(3) . . ?
Mn1 Se1 Mn3 103.50(4) . . ?
Mn1 Se1 Mn2 69.68(4) . . ?
Mn3 Se1 Mn2 68.83(4) . . ?
Mn1 Se1 Cr1 128.54(4) . . ?
Mn3 Se1 Cr1 127.59(5) . . ?
Mn2 Se1 Cr1 130.08(5) . . ?
Mn1 Se2 Mn2 69.58(4) . . ?
Mn1 Se2 Mn3 102.68(4) . . ?
Mn2 Se2 Mn3 68.34(4) . . ?
Mn1 Se2 Cr2 127.67(4) . . ?
Mn2 Se2 Cr2 122.67(5) . . ?
Mn3 Se2 Cr2 129.57(4) . . ?
 
_diffrn_measured_fraction_theta_max    0.976
_diffrn_reflns_theta_full              25.03
_diffrn_measured_fraction_theta_full   0.976
_refine_diff_density_max    0.982
_refine_diff_density_min   -0.823
_refine_diff_density_rms    0.118
